# Supplementary material
Source: Frontiers journal article supplement (https://www.frontiersin.org/articles/478841)
Supplement: Data_Sheet_5.zip [file Table 1.XLSX]

## Sheet: Table S1_Total_read_per_sample
Table S1. Total number of sequence reads per sample, B. napus line and week.
Sample	CanolaLine	Week	TotalReads
ORIG1CS1330NW10000a	NAM-17	10	5925.29
ORIG1CS1244NW05000b	NAM-23	5	9898.54
ORIG1CS1208NW06000b	NAM-37	6	11705.4
ORIG1CS1302NW01000a	NAM-5	1	16402.1
ORIG1CS1309NW03000b	NAM-72	3	21255.3
ORIG1CS1143NW06000c	NAM-30	6	40485.4
ORIG1CS1337NW02000b	NAM-23	2	53099.3
ORIG1CS1208NW02000b	NAM-37	2	58516.9
ORIG1CS1340NW01000c	NAM-46	1	69272.3
ORIG1CS1228YW04000b	NAM-46	4	81085
ORIG1CS1130NW01000b	NAM-5	1	82838.6
ORIG1CS1309NW09000b	NAM-72	9	84128.7
ORIG1CS1123NW01000c	NAM-48	1	84316.9
ORIG1CS1355NW01000b	NAM-79	1	89108.9
ORIG1CS1340NW04000b	NAM-46	4	89604.3
ORIG1CS1225NW01000b	NAM-0	1	94787.4
ORIG1CS1225NW02000c	NAM-0	2	98236.6
ORIG1CS1129NW02000c	NAM-17	2	101905
ORIG1CS1218NW02000b	NAM-17	2	107987
ORIG1CS1229NW04000b	NAM-76	4	109451
ORIG1CS1143NW02000b	NAM-30	2	110269
ORIG1CS1218NW04000c	NAM-17	4	110676
ORIG1CS1116NW08000b	NAM-46	8	115856
ORIG1CS1319NW01000b	NAM-48	1	121950
ORIG1CS1207NW02000c	NAM-43	2	126885
ORIG1CS1108NW08000c	NAM-0	8	130698
ORIG1CS1116NW03000b	NAM-46	3	131643
ORIG1CS1151NW01000b	NAM-79	1	135412
ORIG1CS1252YW01000b	NAM-32	1	136653
ORIG1CS1327NW01000b	NAM-76	1	143064
ORIG1CS1346NW02000b	NAM-32	2	143295
ORIG1CS1308NW01000b	NAM-13	1	143631
ORIG1CS1130NW08000b	NAM-5	8	143716
ORIG1CS1230NW02000b	YN04-C1213	2	144787
ORIG1CS1230NW10000b	YN04-C1213	10	148128
ORIG1CS1144NW01000b	NAM-76	1	153228
ORIG1CS1355NW09000b	NAM-79	9	153946
ORIG1CS1327NW04000b	NAM-76	4	155669
ORIG1CS1218NW01000c	NAM-17	1	156171
ORIG1CS1208NW09000b	NAM-37	9	156245
ORIG1CS1130NW09000a	NAM-5	9	158467
ORIG1CS1316NW08000b	NAM-30	8	161302
ORIG1CS1346NW01000b	NAM-32	1	166122
ORIG1CS1211NW03000b	NAM-30	3	173697
ORIG1CS1137NW02000c	NAM-72	2	175961
ORIG1CS1255NW01000c	NAM-48	1	177442
ORIG1CS1228NW01000c	NAM-46	1	178031
ORIG1CS1208NW01000b	NAM-37	1	180832
ORIG1CS1244NW04000b	NAM-23	4	183024
ORIG1CS1330NW04000b	NAM-17	4	183033
ORIG1CS1108NW02000b	NAM-0	2	186551
ORIG1CS1337NW06000b	NAM-23	6	188817
ORIG1CS1130NW04000b	NAM-5	4	190718
ORIG1CS1228NW02000a	NAM-46	2	201259
ORIG1CS1356NW07000b	YN04-C1213	7	204610
ORIG1CS1302NW04000b	NAM-5	4	210000
ORIG1CS1237NW08000c	NAM-14	8	217652
ORIG1CS1237NW02000b	NAM-14	2	231366
ORIG1CS1115NW06000b	NAM-13	6	237886
ORIG1CS1144NW09000b	NAM-76	9	238291
ORIG1CS1309NW08000b	NAM-72	8	239110
ORIG1CS1136NW06000b	NAM-23	6	240535
ORIG1CS1151NW10000c	NAM-79	10	241134
ORIG1CS1144NW02000c	NAM-76	2	243729
ORIG1CS1150NW09000b	NAM-32	9	247220
ORIG1CS1215NW04000b	NAM-72	4	249962
ORIG1CS1101NW01000b	YN04-C1213	1	255036
ORIG1CS1211NW09000c	NAM-30	9	259168
ORIG1CS1319NW02000b	NAM-48	2	261045
ORIG1CS1129NW01000c	NAM-17	1	265262
ORIG1CS1343NW01000b	NAM-37	1	265338
ORIG1CS1322NW01000c	NAM-14	1	266278
ORIG1CS1144NW03000c	NAM-76	3	276239
ORIG1CS1109NW02000c	NAM-43	2	279672
ORIG1CS1229NW06000b	NAM-76	6	283671
ORIG1CS1123NW02000b	NAM-48	2	284286
ORIG1CS1207NW10000b	NAM-43	10	285029
ORIG1CS1230NW04000c	YN04-C1213	4	285119
ORIG1CS1229NW02000c	NAM-76	2	288206
ORIG1CS1316NW06000b	NAM-30	6	300089
ORIG1CS1115NW01000c	NAM-13	1	304459
ORIG1CS1108NW05000b	NAM-0	5	304907
ORIG1CS1237NW06000b	NAM-14	6	308663
ORIG1CS1309NW02000c	NAM-72	2	315289
ORIG1CS1109NW07000b	NAM-43	7	323243
ORIG1CS1330NW09000b	NAM-17	9	323927
ORIG1CS1115NW10000b	NAM-13	10	333742
ORIG1CS1343NW03000b	NAM-37	3	337239
ORIG1CS1244NW02000c	NAM-23	2	338502
ORIG1CS1308NW07000c	NAM-13	7	354646
ORIG1CS1237NW03000b	NAM-14	3	358322
ORIG1CS1136NW04000b	NAM-23	4	358671
ORIG1CS1215NW06000b	NAM-72	6	360364
ORIG1CS1302NW06000b	NAM-5	6	360633
ORIG1CS1215NW09000c	NAM-72	9	365044
ORIG1CS1151NW09000b	NAM-79	9	366557
ORIG1CS1236NW04000b	NAM-79	4	367362
ORIG1CS1203NW04000b	NAM-13	4	372337
ORIG1CS1244NW09000b	NAM-23	9	373287
ORIG1CS1116NW06000b	NAM-46	6	374582
ORIG1CS1355NW10000c	NAM-79	10	375024
ORIG1CS1123NW07000b	NAM-48	7	375448
ORIG1CS1245YW02000a	NAM-5	2	380904
ORIG1CS1319NW04000c	NAM-48	4	385221
ORIG1CS1101NW02000a	YN04-C1213	2	386271
ORIG1CS1316NW04000a	NAM-30	4	390678
ORIG1CS1143NW08000c	NAM-30	8	393921
ORIG1CS1122NW02000b	NAM-14	2	394519
ORIG1CS1102NW10000b	NAM-37	10	394719
ORIG1CS1237NW07000b	NAM-14	7	396997
ORIG1CS1225NW03000a	NAM-0	3	402501
ORIG1CS1229NW01000b	NAM-76	1	406730
ORIG1CS1255NW07000b	NAM-48	7	410303
ORIG1CS1236NW01000c	NAM-79	1	415481
ORIG1CS1316NW01000b	NAM-30	1	424374
ORIG1CS1236NW03000c	NAM-79	3	432056
ORIG1CS1211NW02000c	NAM-30	2	453289
ORIG1CS1303NW08000a	NAM-0	8	458309
ORIG1CS1237NW01000c	NAM-14	1	460481
ORIG1CS1343NW10000c	NAM-37	10	462363
ORIG1CS1136NW09000c	NAM-23	9	470273
ORIG1CS1150NW02000b	NAM-32	2	472177
ORIG1CS1230NW08000b	YN04-C1213	8	478426
ORIG1CS1116NW02000c	NAM-46	2	484434
ORIG1CS1252NW08000c	NAM-32	8	486167
ORIG1CS1208NW04000c	NAM-37	4	487543
ORIG1CS1108NW10000a	NAM-0	10	488161
ORIG1CS1116NW01000b	NAM-46	1	498548
ORIG1CS1208NW08000c	NAM-37	8	500414
ORIG1CS1218NW07000b	NAM-17	7	511051
ORIG1CS1330NW06000b	NAM-17	6	514318
ORIG1CS1101YW07000b	YN04-C1213	7	521231
ORIG1CS1116NW09000c	NAM-46	9	521426
ORIG1CS1122NW04000b	NAM-14	4	525109
ORIG1CS1144NW08000b	NAM-76	8	529297
ORIG1CS1150NW08000a	NAM-32	8	531644
ORIG1CS1218NW10000c	NAM-17	10	537509
ORIG1CS1229NW09000c	NAM-76	9	539723
ORIG1CS1252NW02000a	NAM-32	2	542727
ORIG1CS1327NW02000a	NAM-76	2	548714
ORIG1CS1340NW10000b	NAM-46	10	553544
ORIG1CS1203NW02000b	NAM-13	2	555154
ORIG1CS1255NW03000b	NAM-48	3	556408
ORIG1CS1207NW04000b	NAM-43	4	561170
ORIG1CS1137NW04000c	NAM-72	4	563215
ORIG1CS1130NW06000b	NAM-5	6	573819
ORIG1CS1218NW09000c	NAM-17	9	575192
ORIG1CS1129NW08000b	NAM-17	8	578004
ORIG1CS1225NW09000b	NAM-0	9	578008
ORIG1CS1303NW04000c	NAM-0	4	588136
ORIG1CS1225NW04000c	NAM-0	4	590719
ORIG1CS1252NW05000b	NAM-32	5	593352
ORIG1CS1330NW01000a	NAM-17	1	596665
ORIG1CS1151YW02000b	NAM-79	2	615978
ORIG1CS1303NW07000a	NAM-0	7	619426
ORIG1CS1207NW05000b	NAM-43	5	622898
ORIG1CS1122NW08000b	NAM-14	8	623446
ORIG1CS1151NW04000c	NAM-79	4	626559
ORIG1CS1229NW07000c	NAM-76	7	630933
ORIG1CS1330NW02000c	NAM-17	2	651542
ORIG1CS1203NW01000b	NAM-13	1	657268
ORIG1CS1130NW03000c	NAM-5	3	660768
ORIG1CS1215NW10000c	NAM-72	10	664687
ORIG1CS1203NW10000c	NAM-13	10	665506
ORIG1CS1102NW02000b	NAM-37	2	668355
ORIG1CS1236NW10000L	NAM-79	10	671511
ORIG1CS1207NW01000c	NAM-43	1	678014
ORIG1CS1316NW02000a	NAM-30	2	692745
ORIG1CS1255NW08000c	NAM-48	8	697802
ORIG1CS1337NW04000b	NAM-23	4	697810
ORIG1CS1302NW10000a	NAM-5	10	700126
ORIG1CS1346NW09000c	NAM-32	9	700638
ORIG1CS1236NW02000L	NAM-79	2	701014
ORIG1CS1218NW08000b	NAM-17	8	705466
ORIG1CS1316NW05000a	NAM-30	5	712203
ORIG1CS1333NW09000b	NAM-43	9	719486
ORIG1CS1144NW04000c	NAM-76	4	737800
ORIG1CS1343NW02000c	NAM-37	2	738324
ORIG1CS1115NW02000a	NAM-13	2	750963
ORIG1CS1136NW01000a	NAM-23	1	754502
ORIG1CS1144NW10000c	NAM-76	10	755451
ORIG1CS1211NW04000b	NAM-30	4	755866
ORIG1CS1115NW03000b	NAM-13	3	759849
ORIG1CS1337NW03000b	NAM-23	3	762523
ORIG1CS1225YW07000b	NAM-0	7	763153
ORIG1CS1322NW07000a	NAM-14	7	764781
ORIG1CS1101NW09000c	YN04-C1213	9	767211
ORIG1CS1215NW08000c	NAM-72	8	767966
ORIG1CS1245NW03000b	NAM-5	3	769824
ORIG1CS1245NW05000b	NAM-5	5	770376
ORIG1CS1215NW01000b	NAM-72	1	793731
ORIG1CS1123NW09000c	NAM-48	9	795578
ORIG1CS1356NW02000c	YN04-C1213	2	796255
ORIG1CS1303NW02000b	NAM-0	2	799355
ORIG1CS1236NW08000b	NAM-79	8	813927
ORIG1CS1322NW09000a	NAM-14	9	817721
ORIG1CS1203NW09000b	NAM-13	9	818585
ORIG1CS1109NW01000b	NAM-43	1	824424
ORIG1CS1343NW09000c	NAM-37	9	826237
ORIG1CS1150NW05000a	NAM-32	5	826924
ORIG1CS1346NW10000b	NAM-32	10	826936
ORIG1CS1303NW03000c	NAM-0	3	831477
ORIG1CS1356NW01000c	YN04-C1213	1	838246
ORIG1CS1211YW06000c	NAM-30	6	843836
ORIG1CS1255NW05000b	NAM-48	5	852225
ORIG1CS1129NW09000c	NAM-17	9	856730
ORIG1CS1101NW03000a	YN04-C1213	3	860408
ORIG1CS1236NW07000c	NAM-79	7	864051
ORIG1CS1327NW08000b	NAM-76	8	864877
ORIG1CS1355NW04000b	NAM-79	4	872908
ORIG1CS1143NW04000a	NAM-30	4	880514
ORIG1CS1302NW08000c	NAM-5	8	890712
ORIG1CS1309NW07000a	NAM-72	7	895195
ORIG1CS1245NW09000b	NAM-5	9	898757
ORIG1CS1215NW02000b	NAM-72	2	899156
ORIG1CS1225NW05000a	NAM-0	5	903462
ORIG1CS1255NW09000c	NAM-48	9	904781
ORIG1CS1109NW10000a	NAM-43	10	905995
ORIG1CS1211NW10000c	NAM-30	10	913520
ORIG1CS1130NW02000a	NAM-5	2	919062
ORIG1CS1327NW09000a	NAM-76	9	921389
ORIG1CS1115NW04000b	NAM-13	4	930237
ORIG1CS1245NW04000b	NAM-5	4	953568
ORIG1CS1322NW03000b	NAM-14	3	977809
ORIG1CS1237NW04000c	NAM-14	4	981507
ORIG1CS1244NW08000c	NAM-23	8	985312
ORIG1CS1215NW07000a	NAM-72	7	988021
ORIG1CS1143NW03000c	NAM-30	3	1.00612e+06
ORIG1CS1143NW05000a	NAM-30	5	1.00783e+06
ORIG1CS1337NW01000c	NAM-23	1	1.00944e+06
ORIG1CS1150NW01000a	NAM-32	1	1.00977e+06
ORIG1CS1355NW02000c	NAM-79	2	1.01948e+06
ORIG1CS1244NW03000c	NAM-23	3	1.0233e+06
ORIG1CS1303NW10000c	NAM-0	10	1.02426e+06
ORIG1CS1207NW09000c	NAM-43	9	1.02496e+06
ORIG1CS1225NW06000b	NAM-0	6	1.02903e+06
ORIG1CS1122NW01000a	NAM-14	1	1.03246e+06
ORIG1CS1228NW05000b	NAM-46	5	1.03778e+06
ORIG1CS1333NW03000c	NAM-43	3	1.04253e+06
ORIG1CS1322NW04000a	NAM-14	4	1.05135e+06
ORIG1CS1108NW07000b	NAM-0	7	1.05342e+06
ORIG1CS1255NW04000c	NAM-48	4	1.06271e+06
ORIG1CS1244NW10000a	NAM-23	10	1.07157e+06
ORIG1CS1330NW03000b	NAM-17	3	1.09784e+06
ORIG1CS1302NW07000c	NAM-5	7	1.10133e+06
ORIG1CS1337NW09000a	NAM-23	9	1.10163e+06
ORIG1CS1245NW07000a	NAM-5	7	1.10579e+06
ORIG1CS1101NW10000c	YN04-C1213	10	1.11556e+06
ORIG1CS1123NW06000c	NAM-48	6	1.12457e+06
ORIG1CS1308NW09000c	NAM-13	9	1.1287e+06
ORIG1CS1101NW06000c	YN04-C1213	6	1.12905e+06
ORIG1CS1101NW08000a	YN04-C1213	8	1.16609e+06
ORIG1CS1102NW01000a	NAM-37	1	1.1766e+06
ORIG1CS1229NW08000L	NAM-76	8	1.18207e+06
ORIG1CS1316NW07000c	NAM-30	7	1.19315e+06
ORIG1CS1136NW08000b	NAM-23	8	1.19782e+06
ORIG1CS1108NW04000c	NAM-0	4	1.20311e+06
ORIG1CS1309NW01000a	NAM-72	1	1.20367e+06
ORIG1CS1208NW05000c	NAM-37	5	1.21376e+06
ORIG1CS1355NW08000c	NAM-79	8	1.2278e+06
ORIG1CS1327NW10000c	NAM-76	10	1.24412e+06
ORIG1CS1236NW06000a	NAM-79	6	1.24832e+06
ORIG1CS1136NW10000c	NAM-23	10	1.25465e+06
ORIG1CS1203NW03000a	NAM-13	3	1.26079e+06
ORIG1CS1302NW03000c	NAM-5	3	1.273e+06
ORIG1CS1316NW10000c	NAM-30	10	1.28173e+06
ORIG1CS1322NW06000c	NAM-14	6	1.2842e+06
ORIG1CS1309NW04000a	NAM-72	4	1.28574e+06
ORIG1CS1346NW04000b	NAM-32	4	1.29532e+06
ORIG1CS1109NW09000b	NAM-43	9	1.30488e+06
ORIG1CS1207NW06000a	NAM-43	6	1.30786e+06
ORIG1CS1137NW03000c	NAM-72	3	1.30859e+06
ORIG1CS1356NW10000c	YN04-C1213	10	1.31064e+06
ORIG1CS1203NW06000b	NAM-13	6	1.31486e+06
ORIG1CS1245NW01000c	NAM-5	1	1.31879e+06
ORIG1CS1109NW04000a	NAM-43	4	1.3376e+06
ORIG1CS1245NW10000c	NAM-5	10	1.33997e+06
ORIG1CS1136NW02000b	NAM-23	2	1.34819e+06
ORIG1CS1356NW09000a	YN04-C1213	9	1.36188e+06
ORIG1CS1109NW06000a	NAM-43	6	1.36216e+06
ORIG1CS1333NW02000a	NAM-43	2	1.36725e+06
ORIG1CS1237NW09000b	NAM-14	9	1.37273e+06
ORIG1CS1123NW03000c	NAM-48	3	1.40309e+06
ORIG1CS1252NW04000c	NAM-32	4	1.43054e+06
ORIG1CS1356NW06000a	YN04-C1213	6	1.44143e+06
ORIG1CS1137NW06000b	NAM-72	6	1.44343e+06
ORIG1CS1136NW07000c	NAM-23	7	1.44515e+06
ORIG1CS1143NW09000a	NAM-30	9	1.45705e+06
ORIG1CS1316NW09000a	NAM-30	9	1.47458e+06
ORIG1CS1322NW08000c	NAM-14	8	1.49453e+06
ORIG1CS1208NW03000b	NAM-37	3	1.49985e+06
ORIG1CS1236NW05000b	NAM-79	5	1.50779e+06
ORIG1CS1330NW08000a	NAM-17	8	1.51413e+06
ORIG1CS1230NW09000c	YN04-C1213	9	1.52695e+06
ORIG1CS1319NW07000b	NAM-48	7	1.54775e+06
ORIG1CS1116NW04000a	NAM-46	4	1.58212e+06
ORIG1CS1228NW06000c	NAM-46	6	1.58386e+06
ORIG1CS1129NW05000c	NAM-17	5	1.58416e+06
ORIG1CS1211NW01000a	NAM-30	1	1.58604e+06
ORIG1CS1102NW09000a	NAM-37	9	1.63766e+06
ORIG1CS1225NW10000a	NAM-0	10	1.64677e+06
ORIG1CS1144NW06000a	NAM-76	6	1.65455e+06
ORIG1CS1123NW05000c	NAM-48	5	1.67043e+06
ORIG1CS1102NW04000b	NAM-37	4	1.67341e+06
ORIG1CS1343NW06000c	NAM-37	6	1.70491e+06
ORIG1CS1308NW03000a	NAM-13	3	1.71626e+06
ORIG1CS1116NW07000c	NAM-46	7	1.72143e+06
ORIG1CS1109NW03000c	NAM-43	3	1.72299e+06
ORIG1CS1108NW09000c	NAM-0	9	1.74728e+06
ORIG1CS1322NW10000a	NAM-14	10	1.76175e+06
ORIG1CS1137NW10000b	NAM-72	10	1.78682e+06
ORIG1CS1230NW07000a	YN04-C1213	7	1.79184e+06
ORIG1CS1308NW04000a	NAM-13	4	1.79209e+06
ORIG1CS1151NW07000c	NAM-79	7	1.79573e+06
ORIG1CS1333NW06000a	NAM-43	6	1.79755e+06
ORIG1CS1340NW08000a	NAM-46	8	1.82988e+06
ORIG1CS1230NW01000a	YN04-C1213	1	1.85007e+06
ORIG1CS1319NW09000a	NAM-48	9	1.85219e+06
ORIG1CS1122NW03000a	NAM-14	3	1.85607e+06
ORIG1CS1308NW06000b	NAM-13	6	1.85832e+06
ORIG1CS1355NW06000c	NAM-79	6	1.86579e+06
ORIG1CS1346NW07000c	NAM-32	7	1.87515e+06
ORIG1CS1308NW02000a	NAM-13	2	1.88002e+06
ORIG1CS1343NW08000b	NAM-37	8	1.88928e+06
ORIG1CS1302NW09000a	NAM-5	9	1.91814e+06
ORIG1CS1122NW06000a	NAM-14	6	1.97773e+06
ORIG1CS1309NW05000b	NAM-72	5	1.98548e+06
ORIG1CS1244NW06000a	NAM-23	6	1.98935e+06
ORIG1CS1346NW08000c	NAM-32	8	2.00713e+06
ORIG1CS1333NW01000b	NAM-43	1	2.01323e+06
ORIG1CS1218NW03000a	NAM-17	3	2.02921e+06
ORIG1CS1151NW08000a	NAM-79	8	2.04337e+06
ORIG1CS1229NW03000a	NAM-76	3	2.05786e+06
ORIG1CS1151NW03000b	NAM-79	3	2.05885e+06
ORIG1CS1255NW06000b	NAM-48	6	2.08291e+06
ORIG1CS1129NW10000c	NAM-17	10	2.08828e+06
ORIG1CS1102NW03000b	NAM-37	3	2.10681e+06
ORIG1CS1245NW08000a	NAM-5	8	2.11496e+06
ORIG1CS1109NW08000c	NAM-43	8	2.12087e+06
ORIG1CS1252NW03000c	NAM-32	3	2.12709e+06
ORIG1CS1203NW08000c	NAM-13	8	2.13019e+06
ORIG1CS1211NW08000b	NAM-30	8	2.13401e+06
ORIG1CS1355NW07000a	NAM-79	7	2.18573e+06
ORIG1CS1229NW10000a	NAM-76	10	2.18838e+06
ORIG1CS1108NW06000a	NAM-0	6	2.22346e+06
ORIG1CS1143NW01000a	NAM-30	1	2.22587e+06
ORIG1CS1322NW02000a	NAM-14	2	2.22717e+06
ORIG1CS1333NW10000c	NAM-43	10	2.2411e+06
ORIG1CS1137NW07000a	NAM-72	7	2.2729e+06
ORIG1CS1255NW10000b	NAM-48	10	2.28822e+06
ORIG1CS1208NW10000c	NAM-37	10	2.30578e+06
ORIG1CS1319NW03000a	NAM-48	3	2.32106e+06
ORIG1CS1330NW05000c	NAM-17	5	2.35115e+06
ORIG1CS1218NW05000b	NAM-17	5	2.40214e+06
ORIG1CS1101NW04000a	YN04-C1213	4	2.42903e+06
ORIG1CS1123NW04000c	NAM-48	4	2.44353e+06
ORIG1CS1252NW09000a	NAM-32	9	2.48225e+06
ORIG1CS1115NW09000a	NAM-13	9	2.53241e+06
ORIG1CS1116NW10000b	NAM-46	10	2.5376e+06
ORIG1CS1228NW09000c	NAM-46	9	2.56547e+06
ORIG1CS1137NW08000b	NAM-72	8	2.59653e+06
ORIG1CS1130NW07000c	NAM-5	7	2.6462e+06
ORIG1CS1122NW09000a	NAM-14	9	2.69919e+06
ORIG1CS1150NW06000c	NAM-32	6	2.71492e+06
ORIG1CS1144NW05000a	NAM-76	5	2.72479e+06
ORIG1CS1356YW03000a	YN04-C1213	3	2.74717e+06
ORIG1CS1150NW10000b	NAM-32	10	2.76235e+06
ORIG1CS1228YW10000b	NAM-46	10	2.7868e+06
ORIG1CS1337NW10000a	NAM-23	10	2.79303e+06
ORIG1CS1356NW04000a	YN04-C1213	4	2.82877e+06
ORIG1CS1230NW05000a	YN04-C1213	5	2.93436e+06
ORIG1CS1150NW04000a	NAM-32	4	2.9494e+06
ORIG1CS1129NW06000a	NAM-17	6	2.97775e+06
ORIG1CS1308NW08000c	NAM-13	8	2.99414e+06
ORIG1CS1356NW08000c	YN04-C1213	8	2.99463e+06
ORIG1CS1115NW05000b	NAM-13	5	3.02083e+06
ORIG1CS1137YW09000a	NAM-72	9	3.02814e+06
ORIG1CS1327NW06000a	NAM-76	6	3.05829e+06
ORIG1CS1340NW07000b	NAM-46	7	3.05975e+06
ORIG1CS1237NW05000a	NAM-14	5	3.06222e+06
ORIG1CS1333NW08000a	NAM-43	8	3.06305e+06
ORIG1CS1136NW03000c	NAM-23	3	3.08366e+06
ORIG1CS1215NW05000c	NAM-72	5	3.1538e+06
ORIG1CS1244NW07000c	NAM-23	7	3.20112e+06
ORIG1CS1225NW08000c	NAM-0	8	3.24958e+06
ORIG1CS1115NW08000b	NAM-13	8	3.29121e+06
ORIG1CS1230NW03000c	YN04-C1213	3	3.40417e+06
ORIG1CS1102NW06000a	NAM-37	6	3.41615e+06
ORIG1CS1343NW04000c	NAM-37	4	3.52204e+06
ORIG1CS1319NW06000a	NAM-48	6	3.60207e+06
ORIG1CS1316NW03000c	NAM-30	3	3.65083e+06
ORIG1CS1208NW07000a	NAM-37	7	3.77793e+06
ORIG1CS1346NW03000b	NAM-32	3	3.78214e+06
ORIG1CS1236NW09000b	NAM-79	9	3.80846e+06
ORIG1CS1303NW06000a	NAM-0	6	3.85986e+06
ORIG1CS1303NW05000c	NAM-0	5	3.96228e+06
ORIG1CS1309NW06000a	NAM-72	6	4.03727e+06
ORIG1CS1322NW05000c	NAM-14	5	4.0549e+06
ORIG1CS1207NW08000c	NAM-43	8	4.11518e+06
ORIG1CS1123NW08000a	NAM-48	8	4.1467e+06
ORIG1CS1150NW07000c	NAM-32	7	4.19554e+06
ORIG1CS1123NW10000a	NAM-48	10	4.20219e+06
ORIG1CS1327NW05000a	NAM-76	5	4.31572e+06
ORIG1CS1319NW08000a	NAM-48	8	4.35751e+06
ORIG1CS1136NW05000a	NAM-23	5	4.40104e+06
ORIG1CS1333NW05000a	NAM-43	5	4.44423e+06
ORIG1CS1215NW03000c	NAM-72	3	4.44607e+06
ORIG1CS1252NW06000a	NAM-32	6	4.46594e+06
ORIG1CS1144NW07000a	NAM-76	7	4.54932e+06
ORIG1CS1333NW04000a	NAM-43	4	4.60948e+06
ORIG1CS1122NW07000a	NAM-14	7	4.77619e+06
ORIG1CS1203NW07000b	NAM-13	7	4.85235e+06
ORIG1CS1228NW03000a	NAM-46	3	4.85845e+06
ORIG1CS1143NW07000a	NAM-30	7	5.06265e+06
ORIG1CS1230NW06000a	YN04-C1213	6	5.10022e+06
ORIG1CS1109NW05000a	NAM-43	5	5.19972e+06
ORIG1CS1252NW07000a	NAM-32	7	5.30746e+06
ORIG1CS1130NW10000c	NAM-5	10	5.38713e+06
ORIG1CS1327NW07000a	NAM-76	7	5.43613e+06
ORIG1CS1211NW07000c	NAM-30	7	5.59975e+06
ORIG1CS1218NW06000b	NAM-17	6	5.60957e+06
ORIG1CS1207NW03000a	NAM-43	3	5.70156e+06
ORIG1CS1129NW07000a	NAM-17	7	5.77931e+06
ORIG1CS1355NW03000c	NAM-79	3	5.78107e+06
ORIG1CS1102NW05000b	NAM-37	5	5.93308e+06
ORIG1CS1346NW06000a	NAM-32	6	6.00877e+06
ORIG1CS1252NW10000a	NAM-32	10	6.16228e+06
ORIG1CS1308NW10000a	NAM-13	10	6.26035e+06
ORIG1CS1255NW02000a	NAM-48	2	6.35327e+06
ORIG1CS1102NW08000a	NAM-37	8	6.4588e+06
ORIG1CS1327NW03000c	NAM-76	3	6.53504e+06
ORIG1CS1303NW09000a	NAM-0	9	6.59305e+06
ORIG1CS1151NW06000a	NAM-79	6	6.63839e+06
ORIG1CS1245NW06000a	NAM-5	6	6.6524e+06
ORIG1CS1302NW02000a	NAM-5	2	6.69779e+06
ORIG1CS1343NW05000c	NAM-37	5	6.73076e+06
ORIG1CS1337NW08000c	NAM-23	8	6.81402e+06
ORIG1CS1101NW05000c	YN04-C1213	5	7.17436e+06
ORIG1CS1302NW05000a	NAM-5	5	7.49245e+06
ORIG1CS1319NW05000a	NAM-48	5	7.50642e+06
ORIG1CS1211NW05000b	NAM-30	5	7.60802e+06
ORIG1CS1244NW01000a	NAM-23	1	7.61369e+06
ORIG1CS1122NW10000a	NAM-14	10	8.06258e+06
ORIG1CS1115NW07000a	NAM-13	7	8.18384e+06
ORIG1CS1340NW09000a	NAM-46	9	8.26748e+06
ORIG1CS1130YW05000b	NAM-5	5	8.34447e+06
ORIG1CS1150NW03000a	NAM-32	3	8.71734e+06
ORIG1CS1330NW07000c	NAM-17	7	9.16917e+06
ORIG1CS1340NW06000c	NAM-46	6	9.26872e+06
ORIG1CS1343NW07000a	NAM-37	7	9.30117e+06
ORIG1CS1308NW05000a	NAM-13	5	9.69655e+06
ORIG1CS1122NW05000c	NAM-14	5	1.08347e+07
ORIG1CS1228NW08000c	NAM-46	8	1.14002e+07
ORIG1CS1356NW05000a	YN04-C1213	5	1.15507e+07
ORIG1CS1340NW03000a	NAM-46	3	1.1898e+07
ORIG1CS1355NW05000c	NAM-79	5	1.19399e+07
ORIG1CS1129NW04000a	NAM-17	4	1.27178e+07
ORIG1CS1129NW03000a	NAM-17	3	1.27564e+07
ORIG1CS1346NW05000a	NAM-32	5	1.29083e+07
ORIG1CS1102NW07000a	NAM-37	7	1.31136e+07
ORIG1CS1337NW05000a	NAM-23	5	1.40205e+07
ORIG1CS1340NW05000c	NAM-46	5	1.41616e+07
ORIG1CS1319NW10000a	NAM-48	10	1.46599e+07
ORIG1CS1143NW10000c	NAM-30	10	1.4913e+07
ORIG1CS1340YW02000a	NAM-46	2	1.64919e+07
ORIG1CS1333NW07000a	NAM-43	7	1.67988e+07
ORIG1CS1237NW10000a	NAM-14	10	1.83034e+07
ORIG1CS1137NW01000a	NAM-72	1	1.8761e+07
ORIG1CS1151NW05000c	NAM-79	5	2.07022e+07
ORIG1CS1137NW05000a	NAM-72	5	2.14508e+07
ORIG1CS1337NW07000b	NAM-23	7	2.1955e+07
ORIG1CS1229NW05000c	NAM-76	5	2.19917e+07
ORIG1CS1203NW05000a	NAM-13	5	2.54676e+07
ORIG1CS1108NW03000c	NAM-0	3	2.79922e+07
ORIG1CS1228NW07000b	NAM-46	7	2.97105e+07
ORIG1CS1207NW07000a	NAM-43	7	4.40244e+07
ORIG1CS1116NW05000a	NAM-46	5	3.54235e+08
