# Supplementary material
Source: Frontiers journal article supplement (https://www.frontiersin.org/articles/478841)
Supplement: Data_Sheet_5.zip [file Table 3.XLSX]

## Sheet: Table S3_top_phylum_per_sample
Table S3. Total abundance of the three major phyla per sample. Column top phylum indicates the phylum most abundant in respective samples.
Sample	Proteobacteria	Acidobacteria	Chloroflexi	Actinobacteria	Top Phylum
ORIG1CS1101NW01000b	131193	53212.4	12544.1	39469.9	Proteobacteria
ORIG1CS1101NW02000a	84099.6	169764	37355.9	59456.4	Acidobacteria
ORIG1CS1101NW03000a	316549	104547	84954	267108	Proteobacteria
ORIG1CS1101NW04000a	1.11709e+06	343168	136967	615934	Proteobacteria
ORIG1CS1101NW05000c	5.40909e+06	592914	35934.2	529031	Proteobacteria
ORIG1CS1101NW06000c	642245	76184.6	6348.72	330543	Proteobacteria
ORIG1CS1101NW08000a	134310	302391	479400	87728.2	Chloroflexi
ORIG1CS1101NW09000c	364705	85477.8	48057.5	221482	Proteobacteria
ORIG1CS1101NW10000c	557781	86715.7	17162.5	305989	Proteobacteria
ORIG1CS1101YW07000b	168436	146197	70664.2	78954.4	Proteobacteria
ORIG1CS1102NW01000a	387544	276855	116433	246441	Proteobacteria
ORIG1CS1102NW02000b	226593	200207	64196.9	139819	Proteobacteria
ORIG1CS1102NW03000b	1.75534e+06	19510.2	1721.49	243303	Proteobacteria
ORIG1CS1102NW04000b	1.09999e+06	186120	25931.4	280226	Proteobacteria
ORIG1CS1102NW05000b	4.54396e+06	340344	0	664684	Proteobacteria
ORIG1CS1102NW06000a	238336	849989	1.73237e+06	158120	Chloroflexi
ORIG1CS1102NW07000a	1.22625e+06	4.59269e+06	4.44386e+06	1.95572e+06	Acidobacteria
ORIG1CS1102NW08000a	3.57956e+06	180648	85374.9	2.10715e+06	Proteobacteria
ORIG1CS1102NW09000a	543400	219943	208239	502942	Proteobacteria
ORIG1CS1102NW10000b	228620	28711.7	5903.35	93246	Proteobacteria
ORIG1CS1108NW02000b	87295.8	28878.1	9809.75	42490.5	Proteobacteria
ORIG1CS1108NW03000c	2.47149e+07	728892	75588.9	1.69535e+06	Proteobacteria
ORIG1CS1108NW04000c	777538	39139.8	13582.1	324948	Proteobacteria
ORIG1CS1108NW05000b	248304	8009.81	3381.92	35243.2	Proteobacteria
ORIG1CS1108NW06000a	1.24488e+06	188792	131241	516258	Proteobacteria
ORIG1CS1108NW07000b	600909	70049.1	5125.55	303872	Proteobacteria
ORIG1CS1108NW08000c	67353.1	3252.66	1084.22	42646	Proteobacteria
ORIG1CS1108NW09000c	481930	581218	170466	411658	Acidobacteria
ORIG1CS1108NW10000a	150868	187210	35752.6	63451.1	Acidobacteria
ORIG1CS1109NW01000b	155320	281015	188331	129081	Acidobacteria
ORIG1CS1109NW02000c	107685	56420.5	5450.54	89197.3	Proteobacteria
ORIG1CS1109NW03000c	915185	20442.6	3873.34	536458	Proteobacteria
ORIG1CS1109NW04000a	271317	432777	217281	302149	Acidobacteria
ORIG1CS1109NW05000a	1.34368e+06	1.61991e+06	429690	1.10292e+06	Acidobacteria
ORIG1CS1109NW06000a	291017	329272	242805	382899	Actinobacteria
ORIG1CS1109NW07000b	197573	41327.9	0	65998.1	Proteobacteria
ORIG1CS1109NW08000c	946243	251050	76606.1	605676	Proteobacteria
ORIG1CS1109NW09000b	678492	69996.8	40964	507079	Proteobacteria
ORIG1CS1109NW10000a	361204	98958.9	29775.2	331588	Proteobacteria
ORIG1CS1115NW01000c	115267	81082.2	24484.8	46332.7	Proteobacteria
ORIG1CS1115NW02000a	151510	188931	120478	232024	Actinobacteria
ORIG1CS1115NW03000b	606094	69383.3	0	66520.4	Proteobacteria
ORIG1CS1115NW04000b	184668	479730	163157	72243.6	Acidobacteria
ORIG1CS1115NW05000b	1.59428e+06	804974	55135.2	369116	Proteobacteria
ORIG1CS1115NW06000b	136072	22288.9	4540.33	60537.8	Proteobacteria
ORIG1CS1115NW07000a	787609	2.55652e+06	3.36708e+06	829453	Chloroflexi
ORIG1CS1115NW08000b	1.44241e+06	942919	207202	503491	Proteobacteria
ORIG1CS1115NW09000a	353555	801875	678438	447017	Acidobacteria
ORIG1CS1115NW10000b	194878	27616.9	9465.48	80846.3	Proteobacteria
ORIG1CS1116NW01000b	196160	97515.6	41538.9	50411.3	Proteobacteria
ORIG1CS1116NW02000c	210456	52565.2	29086.9	160500	Proteobacteria
ORIG1CS1116NW03000b	39282.4	40997.1	1714.71	34372.1	Acidobacteria
ORIG1CS1116NW04000a	525749	380325	164528	419118	Proteobacteria
ORIG1CS1116NW05000a	1.66974e+08	8.38435e+07	3.18422e+07	3.29367e+07	Proteobacteria
ORIG1CS1116NW06000b	225797	24829.9	6595.43	85740.6	Proteobacteria
ORIG1CS1116NW07000c	1.12095e+06	50994	15725.7	361691	Proteobacteria
ORIG1CS1116NW08000b	53196.4	15174.6	3836.28	31457.5	Proteobacteria
ORIG1CS1116NW09000c	192383	93614.3	15323.8	188482	Proteobacteria
ORIG1CS1116NW10000b	1.73857e+06	59697.4	0	599729	Proteobacteria
ORIG1CS1122NW01000a	287664	157334	167117	284113	Proteobacteria
ORIG1CS1122NW02000b	44053.3	254748	50626.7	15107.3	Acidobacteria
ORIG1CS1122NW03000a	1.54988e+06	58850.4	14307	151625	Proteobacteria
ORIG1CS1122NW04000b	438571	6013.2	392.165	66537.4	Proteobacteria
ORIG1CS1122NW05000c	7.71238e+06	943189	7070.39	1.15247e+06	Proteobacteria
ORIG1CS1122NW06000a	1.19567e+06	94495.7	33725.7	380528	Proteobacteria
ORIG1CS1122NW07000a	2.83373e+06	566178	448884	474859	Proteobacteria
ORIG1CS1122NW08000b	183366	153509	76267.4	172981	Proteobacteria
ORIG1CS1122NW09000a	571908	759721	441929	697506	Acidobacteria
ORIG1CS1122NW10000a	1.13532e+06	3.5411e+06	1.64402e+06	637810	Acidobacteria
ORIG1CS1123NW01000c	31583.3	21678	1948.58	20135.4	Proteobacteria
ORIG1CS1123NW02000b	130661	44345.5	7918.83	74437	Proteobacteria
ORIG1CS1123NW03000c	441717	586558	58272.2	191603	Acidobacteria
ORIG1CS1123NW04000c	1.74451e+06	88450.5	40725.4	490614	Proteobacteria
ORIG1CS1123NW05000c	728972	458412	40914	250763	Proteobacteria
ORIG1CS1123NW06000c	494107	153222	26357.1	375149	Proteobacteria
ORIG1CS1123NW07000b	170839	64943.3	20170.6	93671.1	Proteobacteria
ORIG1CS1123NW08000a	1.75097e+06	132028	57682.1	1.46705e+06	Proteobacteria
ORIG1CS1123NW09000c	282673	50651	16755.7	408405	Actinobacteria
ORIG1CS1123NW10000a	2.44388e+06	373610	88778.6	605729	Proteobacteria
ORIG1CS1129NW01000c	116179	45266.1	13161.6	57074.6	Proteobacteria
ORIG1CS1129NW02000c	41890.8	15279.3	509.31	30685.9	Proteobacteria
ORIG1CS1129NW03000a	1.43763e+06	5.73692e+06	3.45195e+06	565804	Acidobacteria
ORIG1CS1129NW04000a	4.34709e+06	2.06889e+06	992929	4.39034e+06	Actinobacteria
ORIG1CS1129NW05000c	759465	203309	3181.67	435571	Proteobacteria
ORIG1CS1129NW06000a	1.80309e+06	132533	119660	722642	Proteobacteria
ORIG1CS1129NW07000a	1.45131e+06	1.26881e+06	1.81737e+06	580954	Chloroflexi
ORIG1CS1129NW08000b	246474	50694.7	12514.6	238201	Proteobacteria
ORIG1CS1129NW09000c	439589	113638	15900	234759	Proteobacteria
ORIG1CS1129NW10000c	1.23615e+06	341592	25822.3	300645	Proteobacteria
ORIG1CS1130NW01000b	36939.4	28844.2	550.161	5658.8	Proteobacteria
ORIG1CS1130NW02000a	172361	273704	185828	200070	Acidobacteria
ORIG1CS1130NW03000c	274402	106396	13919.8	186526	Proteobacteria
ORIG1CS1130NW04000b	123489	21341.7	1846.36	30084.8	Proteobacteria
ORIG1CS1130NW06000b	214308	130050	20481.7	170014	Proteobacteria
ORIG1CS1130NW07000c	1.96698e+06	45008.4	9671.22	488397	Proteobacteria
ORIG1CS1130NW08000b	88657.7	10055.2	490.499	32986	Proteobacteria
ORIG1CS1130NW09000a	60948.8	28442.8	11174	46524.3	Proteobacteria
ORIG1CS1130NW10000c	3.29006e+06	222831	47847.2	1.32833e+06	Proteobacteria
ORIG1CS1130YW05000b	6.09609e+06	1.17086e+06	214233	530279	Proteobacteria
ORIG1CS1136NW01000a	240623	142831	107905	187557	Proteobacteria
ORIG1CS1136NW02000b	642046	249168	92705.5	316026	Proteobacteria
ORIG1CS1136NW03000c	1.71147e+06	20075.9	37140.4	573167	Proteobacteria
ORIG1CS1136NW04000b	159442	70282.1	11036	93661	Proteobacteria
ORIG1CS1136NW05000a	3.08897e+06	386540	84613.9	344047	Proteobacteria
ORIG1CS1136NW06000b	123301	47383.9	7617.57	36667.6	Proteobacteria
ORIG1CS1136NW07000c	611866	211721	62435.4	442639	Proteobacteria
ORIG1CS1136NW08000b	419176	366899	152035	221338	Proteobacteria
ORIG1CS1136NW09000c	182413	90875.2	29806	115382	Proteobacteria
ORIG1CS1136NW10000c	429693	237334	149112	302030	Proteobacteria
ORIG1CS1137NW01000a	241964	7.72086e+06	8.93948e+06	655503	Chloroflexi
ORIG1CS1137NW02000c	51208.2	36128.8	7359.57	63714.3	Actinobacteria
ORIG1CS1137NW03000c	420028	461602	102945	187412	Acidobacteria
ORIG1CS1137NW04000c	266660	63697.9	14572.4	155038	Proteobacteria
ORIG1CS1137NW05000a	1.11571e+06	1.14201e+07	5.324e+06	1.60993e+06	Acidobacteria
ORIG1CS1137NW06000b	1.22754e+06	26234.2	10930.9	96465.2	Proteobacteria
ORIG1CS1137NW07000a	1.28606e+06	122687	28565.3	668717	Proteobacteria
ORIG1CS1137NW08000b	1.37e+06	60058.6	37369.8	957600	Proteobacteria
ORIG1CS1137NW10000b	831087	254366	58219	283281	Proteobacteria
ORIG1CS1137YW09000a	329376	985949	964699	509185	Acidobacteria
ORIG1CS1143NW01000a	458440	981906	196706	284005	Acidobacteria
ORIG1CS1143NW02000b	43052.3	11699.8	152.939	44275.8	Actinobacteria
ORIG1CS1143NW03000c	225366	521680	56501.9	106262	Acidobacteria
ORIG1CS1143NW04000a	432491	127664	59980.5	213531	Proteobacteria
ORIG1CS1143NW05000a	583362	133525	28507.8	131010	Proteobacteria
ORIG1CS1143NW06000c	23492.3	0	0	11762	Proteobacteria
ORIG1CS1143NW07000a	3.22397e+06	132859	65243.4	1.35635e+06	Proteobacteria
ORIG1CS1143NW08000c	129960	129556	36227.3	72050.6	Proteobacteria
ORIG1CS1143NW09000a	265764	472924	266394	382183	Acidobacteria
ORIG1CS1143NW10000c	8.23886e+06	1.12263e+06	91096.3	2.47434e+06	Proteobacteria
ORIG1CS1144NW01000b	62742.5	50042.9	755.934	16328.2	Proteobacteria
ORIG1CS1144NW02000c	73081.4	76333.6	19187.9	53661.2	Acidobacteria
ORIG1CS1144NW03000c	123700	55924.9	665.053	57557.3	Proteobacteria
ORIG1CS1144NW04000c	336117	115045	48991.7	201329	Proteobacteria
ORIG1CS1144NW05000a	908686	249696	171729	1.16255e+06	Actinobacteria
ORIG1CS1144NW06000a	444193	357875	188104	526310	Actinobacteria
ORIG1CS1144NW07000a	1.28371e+06	1.05805e+06	526280	1.23544e+06	Proteobacteria
ORIG1CS1144NW08000b	347506	21434.4	8707.74	121372	Proteobacteria
ORIG1CS1144NW09000b	113700	53800.6	9257.19	52384.8	Proteobacteria
ORIG1CS1144NW10000c	447221	101467	2297.37	86023.7	Proteobacteria
ORIG1CS1150NW01000a	116561	530558	121785	82331	Acidobacteria
ORIG1CS1150NW02000b	163408	114845	41508.2	106478	Proteobacteria
ORIG1CS1150NW03000a	5.7988e+06	487468	186330	1.8771e+06	Proteobacteria
ORIG1CS1150NW04000a	418111	768358	974999	482162	Chloroflexi
ORIG1CS1150NW05000a	243267	143618	96663.8	275641	Actinobacteria
ORIG1CS1150NW06000c	1.50854e+06	375650	132888	510393	Proteobacteria
ORIG1CS1150NW07000c	1.27583e+06	955896	404467	1.48131e+06	Actinobacteria
ORIG1CS1150NW08000a	183777	69967.1	61031.9	178401	Proteobacteria
ORIG1CS1150NW09000b	56921.3	46143.3	32334	108117	Actinobacteria
ORIG1CS1150NW10000b	1.59037e+06	366906	59391.2	626908	Proteobacteria
ORIG1CS1151NW01000b	71835.1	17195.2	6674.44	34842.9	Proteobacteria
ORIG1CS1151NW03000b	1.29207e+06	210455	25992.4	456544	Proteobacteria
ORIG1CS1151NW04000c	199569	166738	33200.1	187212	Proteobacteria
ORIG1CS1151NW05000c	1.71492e+07	254160	68125.2	1.43325e+06	Proteobacteria
ORIG1CS1151NW06000a	659356	1.05883e+06	2.60338e+06	688863	Chloroflexi
ORIG1CS1151NW07000c	1.03423e+06	62800.4	14174.9	544569	Proteobacteria
ORIG1CS1151NW08000a	999599	197287	131454	561704	Proteobacteria
ORIG1CS1151NW09000b	139641	11856.3	0	187725	Actinobacteria
ORIG1CS1151NW10000c	133871	26928	1089.94	60908.6	Proteobacteria
ORIG1CS1151YW02000b	249126	45782.1	29332.3	222370	Proteobacteria
ORIG1CS1203NW01000b	351913	59861.5	4434.19	217074	Proteobacteria
ORIG1CS1203NW02000b	132180	136048	102090	147869	Actinobacteria
ORIG1CS1203NW03000a	728987	113003	46371.1	275511	Proteobacteria
ORIG1CS1203NW04000b	180572	28325.1	2170.06	130661	Proteobacteria
ORIG1CS1203NW05000a	1.20033e+07	4.7413e+06	1.74985e+06	3.04208e+06	Proteobacteria
ORIG1CS1203NW06000b	658941	67041.6	7851.72	477143	Proteobacteria
ORIG1CS1203NW07000b	4.10597e+06	80665.7	24820.2	470698	Proteobacteria
ORIG1CS1203NW08000c	1.45352e+06	91307.9	30106.9	404716	Proteobacteria
ORIG1CS1203NW09000b	233549	73340.8	35085.2	337959	Actinobacteria
ORIG1CS1203NW10000c	246335	138195	18819.2	199521	Proteobacteria
ORIG1CS1207NW01000c	191092	257892	51089.7	83442.6	Acidobacteria
ORIG1CS1207NW02000c	54745.5	15052.2	4348.42	37240.3	Proteobacteria
ORIG1CS1207NW03000a	1.03364e+06	2.16168e+06	791162	824791	Acidobacteria
ORIG1CS1207NW04000b	209606	147254	9908.03	128463	Proteobacteria
ORIG1CS1207NW05000b	366132	90270.5	4261.02	65493.4	Proteobacteria
ORIG1CS1207NW06000a	361841	332325	198749	293114	Proteobacteria
ORIG1CS1207NW07000a	4.00891e+06	1.28905e+07	1.75617e+07	6.03467e+06	Chloroflexi
ORIG1CS1207NW08000c	2.32135e+06	558702	97359.2	772510	Proteobacteria
ORIG1CS1207NW09000c	370527	127003	37607.6	435262	Actinobacteria
ORIG1CS1207NW10000b	176957	37241.2	0	38458.3	Proteobacteria
ORIG1CS1208NW01000b	50574.5	22728.6	3588.73	84667.4	Actinobacteria
ORIG1CS1208NW02000b	35715.5	11703.4	1210.69	9281.98	Proteobacteria
ORIG1CS1208NW03000b	83103.4	1.03447e+06	267925	28587.6	Acidobacteria
ORIG1CS1208NW04000c	251470	75269.8	8158.62	120011	Proteobacteria
ORIG1CS1208NW05000c	659565	217350	23255.6	157244	Proteobacteria
ORIG1CS1208NW06000b	8716	0	0	2124.97	Proteobacteria
ORIG1CS1208NW07000a	1.08221e+06	520478	560560	1.0392e+06	Proteobacteria
ORIG1CS1208NW08000c	252339	23270.9	177.641	198158	Proteobacteria
ORIG1CS1208NW09000b	77167.1	21679.9	498.388	47263.8	Proteobacteria
ORIG1CS1208NW10000c	857873	141297	27560.6	906784	Actinobacteria
ORIG1CS1211NW01000a	314035	654516	184785	235692	Acidobacteria
ORIG1CS1211NW02000c	96605.3	163221	92237	73756	Acidobacteria
ORIG1CS1211NW03000b	76800.7	33028.3	994.828	43573.5	Proteobacteria
ORIG1CS1211NW04000b	272931	132807	75733	225370	Proteobacteria
ORIG1CS1211NW05000b	4.74833e+06	1.73719e+06	84632.5	347439	Proteobacteria
ORIG1CS1211NW07000c	2.14365e+06	247375	103404	2.78078e+06	Actinobacteria
ORIG1CS1211NW08000b	712695	198536	94177.5	803309	Actinobacteria
ORIG1CS1211NW09000c	112848	35349.9	11977.5	78598.4	Proteobacteria
ORIG1CS1211NW10000c	389033	193072	15506.6	223021	Proteobacteria
ORIG1CS1211YW06000c	292790	110379	46503.1	287705	Proteobacteria
ORIG1CS1215NW01000b	206945	389079	64142.5	69685.7	Acidobacteria
ORIG1CS1215NW02000b	300518	196493	87887.4	263444	Proteobacteria
ORIG1CS1215NW03000c	1.80337e+06	754057	120904	1.37957e+06	Proteobacteria
ORIG1CS1215NW04000b	107793	54007.8	4000.57	61342.1	Proteobacteria
ORIG1CS1215NW05000c	875986	1.22448e+06	270361	465071	Acidobacteria
ORIG1CS1215NW06000b	216875	11318.4	9857.97	99309.9	Proteobacteria
ORIG1CS1215NW07000a	311107	135601	82719.2	375996	Actinobacteria
ORIG1CS1215NW08000c	403666	86843	16376.6	167230	Proteobacteria
ORIG1CS1215NW09000c	150504	33500.2	5237.5	145365	Proteobacteria
ORIG1CS1215NW10000c	382455	61494.7	3217.03	108760	Proteobacteria
ORIG1CS1218NW01000c	69500	39232	6402.85	24563.6	Proteobacteria
ORIG1CS1218NW02000b	56205.9	13698.4	3106.86	23442.7	Proteobacteria
ORIG1CS1218NW03000a	678145	661874	93204.7	308540	Proteobacteria
ORIG1CS1218NW04000c	58481.1	21208.1	5524.27	18160.3	Proteobacteria
ORIG1CS1218NW05000b	1.62503e+06	357478	34655.4	149922	Proteobacteria
ORIG1CS1218NW06000b	3.87424e+06	77070.5	8287.15	1.35329e+06	Proteobacteria
ORIG1CS1218NW07000b	440273	18308.9	0	39321.1	Proteobacteria
ORIG1CS1218NW08000b	353371	48051.6	24238.4	234305	Proteobacteria
ORIG1CS1218NW09000c	207753	144797	18686.8	158488	Proteobacteria
ORIG1CS1218NW10000c	235888	133512	1887.1	92153.4	Proteobacteria
ORIG1CS1225NW01000b	35659	28563.6	363.867	21953.3	Proteobacteria
ORIG1CS1225NW02000c	53940.3	6469.24	1976.71	24948.5	Proteobacteria
ORIG1CS1225NW03000a	154604	96779.2	51004.2	71769.7	Proteobacteria
ORIG1CS1225NW04000c	206825	32705.1	5343.37	283659	Actinobacteria
ORIG1CS1225NW05000a	517796	103107	81954	112158	Proteobacteria
ORIG1CS1225NW06000b	715093	44655.8	1048.96	205896	Proteobacteria
ORIG1CS1225NW08000c	1.13774e+06	65907.5	12287.8	1.7499e+06	Actinobacteria
ORIG1CS1225NW09000b	233216	21867.9	3230.49	291738	Actinobacteria
ORIG1CS1225NW10000a	441366	445294	221384	357470	Acidobacteria
ORIG1CS1225YW07000b	470940	23103.4	12937.9	185936	Proteobacteria
ORIG1CS1228NW01000c	48353.3	62595.8	3062.14	33185	Acidobacteria
ORIG1CS1228NW02000a	114712	14171.9	11943.6	48041.8	Proteobacteria
ORIG1CS1228NW03000a	3.26407e+06	382982	174500	799945	Proteobacteria
ORIG1CS1228NW05000b	613814	4331.92	13184.1	307566	Proteobacteria
ORIG1CS1228NW06000c	743190	61161.6	39232.5	668323	Proteobacteria
ORIG1CS1228NW07000b	1.66236e+07	1.35412e+06	690423	9.22494e+06	Proteobacteria
ORIG1CS1228NW08000c	7.83102e+06	51727.9	0	2.60076e+06	Proteobacteria
ORIG1CS1228NW09000c	1.17362e+06	184425	46887.8	992885	Proteobacteria
ORIG1CS1228YW04000b	31473.8	7379.45	0	33252	Actinobacteria
ORIG1CS1228YW10000b	1.03137e+06	145887	87891.1	1.0822e+06	Actinobacteria
ORIG1CS1229NW01000b	113250	197122	14394.9	46563.1	Acidobacteria
ORIG1CS1229NW02000c	117658	67505.6	16570.9	54698.6	Proteobacteria
ORIG1CS1229NW03000a	684949	475018	117000	550901	Proteobacteria
ORIG1CS1229NW04000b	40345.8	36078.8	5793.42	14570.3	Proteobacteria
ORIG1CS1229NW05000c	1.52409e+07	2.732e+06	661788	2.30212e+06	Proteobacteria
ORIG1CS1229NW06000b	120866	26439.5	0	121127	Actinobacteria
ORIG1CS1229NW07000c	334317	43833.7	12718.6	189984	Proteobacteria
ORIG1CS1229NW08000L	508292	121128	52726.2	305402	Proteobacteria
ORIG1CS1229NW09000c	239772	71529.6	10049.6	167769	Proteobacteria
ORIG1CS1229NW10000a	963369	271274	77315.6	668018	Proteobacteria
ORIG1CS1230NW01000a	483695	640127	150219	317663	Acidobacteria
ORIG1CS1230NW02000b	67507.3	15553.6	3745.88	45927.8	Proteobacteria
ORIG1CS1230NW03000c	1.49297e+06	347570	75921.3	1.31304e+06	Proteobacteria
ORIG1CS1230NW04000c	103067	70157.2	23113.6	58268.7	Proteobacteria
ORIG1CS1230NW05000a	1.15032e+06	624526	155902	615342	Proteobacteria
ORIG1CS1230NW06000a	1.25078e+06	1.51002e+06	1.41024e+06	584410	Acidobacteria
ORIG1CS1230NW07000a	615730	212112	89288.9	713099	Actinobacteria
ORIG1CS1230NW08000b	258991	54730.9	3239.52	125830	Proteobacteria
ORIG1CS1230NW09000c	506904	342094	104677	429621	Proteobacteria
ORIG1CS1230NW10000b	36793.3	45132.2	24889.6	31828.1	Acidobacteria
ORIG1CS1236NW01000c	136074	146139	23517.8	58649.3	Acidobacteria
ORIG1CS1236NW02000L	344666	78278.3	41958.8	109227	Proteobacteria
ORIG1CS1236NW03000c	155565	139282	18253	74567.5	Proteobacteria
ORIG1CS1236NW04000b	137091	59837.8	28876.9	118038	Proteobacteria
ORIG1CS1236NW05000b	694503	400757	46014.8	289465	Proteobacteria
ORIG1CS1236NW06000a	401716	175287	100085	482966	Actinobacteria
ORIG1CS1236NW07000c	550042	17817.4	13225.3	181664	Proteobacteria
ORIG1CS1236NW08000b	380486	81166.4	31380.3	264922	Proteobacteria
ORIG1CS1236NW09000b	902004	167038	556793	2.18263e+06	Actinobacteria
ORIG1CS1236NW10000L	328290	79195.2	20903.1	92944	Proteobacteria
ORIG1CS1237NW01000c	195385	69927.2	25762.7	92550.7	Proteobacteria
ORIG1CS1237NW02000b	115583	17197.5	15197.8	78588.4	Proteobacteria
ORIG1CS1237NW03000b	139676	86865.9	17768	77241.5	Proteobacteria
ORIG1CS1237NW04000c	261626	351448	82309.4	210510	Acidobacteria
ORIG1CS1237NW05000a	1.18114e+06	779681	156756	612444	Proteobacteria
ORIG1CS1237NW06000b	123066	56250.4	25269.8	87659.2	Proteobacteria
ORIG1CS1237NW07000b	262014	21981.8	8947.35	79642.4	Proteobacteria
ORIG1CS1237NW08000c	121614	21447.3	8161.35	42467.5	Proteobacteria
ORIG1CS1237NW09000b	458161	172030	105324	493269	Actinobacteria
ORIG1CS1237NW10000a	2.79139e+06	5.23112e+06	4.24335e+06	4.6794e+06	Acidobacteria
ORIG1CS1244NW01000a	238105	2.85078e+06	3.57967e+06	323952	Chloroflexi
ORIG1CS1244NW02000c	98652.3	91799.4	32265.4	82091.3	Proteobacteria
ORIG1CS1244NW03000c	449648	209475	54475.4	164630	Proteobacteria
ORIG1CS1244NW04000b	88090.7	30056.5	3118.26	44954.9	Proteobacteria
ORIG1CS1244NW05000b	0	9898.54	0	0	Acidobacteria
ORIG1CS1244NW06000a	487411	504775	285531	585255	Actinobacteria
ORIG1CS1244NW07000c	1.04715e+06	891298	191054	779242	Proteobacteria
ORIG1CS1244NW08000c	292231	250366	108124	259761	Proteobacteria
ORIG1CS1244NW09000b	156152	74380.2	5543.87	94861.7	Proteobacteria
ORIG1CS1244NW10000a	412519	162420	70027.6	280398	Proteobacteria
ORIG1CS1245NW01000c	307973	461413	149937	296810	Acidobacteria
ORIG1CS1245NW03000b	239262	345318	49492.7	80885.2	Acidobacteria
ORIG1CS1245NW04000b	603273	157112	19366.7	111601	Proteobacteria
ORIG1CS1245NW05000b	368664	318783	6979.15	10263.5	Proteobacteria
ORIG1CS1245NW06000a	1.63124e+06	2.02449e+06	1.56551e+06	1.07423e+06	Acidobacteria
ORIG1CS1245NW07000a	335186	219103	151178	291818	Proteobacteria
ORIG1CS1245NW08000a	540791	497032	293125	628049	Actinobacteria
ORIG1CS1245NW09000b	391159	160339	40470.6	256886	Proteobacteria
ORIG1CS1245NW10000c	663457	214587	21985.4	237489	Proteobacteria
ORIG1CS1245YW02000a	90223.3	81477.7	65715.8	114879	Actinobacteria
ORIG1CS1252NW02000a	63513	176375	202230	50922.8	Chloroflexi
ORIG1CS1252NW03000c	701322	587215	101597	518599	Proteobacteria
ORIG1CS1252NW04000c	755643	102094	8098.81	465313	Proteobacteria
ORIG1CS1252NW05000b	301719	83203.8	0	135311	Proteobacteria
ORIG1CS1252NW06000a	1.64134e+06	865967	864250	524217	Proteobacteria
ORIG1CS1252NW07000a	2.33613e+06	270904	120549	1.93938e+06	Proteobacteria
ORIG1CS1252NW08000c	207109	32818.9	6796.82	203613	Proteobacteria
ORIG1CS1252NW09000a	610153	640746	348133	707030	Actinobacteria
ORIG1CS1252NW10000a	2.2783e+06	1.24722e+06	440163	1.4586e+06	Proteobacteria
ORIG1CS1252YW01000b	77169	32852.7	1607.69	12581.9	Proteobacteria
ORIG1CS1255NW01000c	44530.4	30000.5	26132.8	64861.7	Actinobacteria
ORIG1CS1255NW02000a	2.49487e+06	1.08168e+06	1.42321e+06	520581	Proteobacteria
ORIG1CS1255NW03000b	381625	92786	12638.6	53945.3	Proteobacteria
ORIG1CS1255NW04000c	326092	246991	84439.7	361291	Actinobacteria
ORIG1CS1255NW05000b	199413	195578	107081	297350	Actinobacteria
ORIG1CS1255NW06000b	679287	349261	355841	593237	Proteobacteria
ORIG1CS1255NW07000b	269777	8858.35	8657.03	105495	Proteobacteria
ORIG1CS1255NW08000c	263298	126935	28557	202085	Proteobacteria
ORIG1CS1255NW09000c	276898	124034	48608.1	387356	Actinobacteria
ORIG1CS1255NW10000b	1.19566e+06	469402	108532	249624	Proteobacteria
ORIG1CS1302NW01000a	10175	104.282	0	5243.91	Proteobacteria
ORIG1CS1302NW02000a	655302	2.11838e+06	2.34453e+06	1.09988e+06	Chloroflexi
ORIG1CS1302NW03000c	1.07802e+06	38669.6	0	103608	Proteobacteria
ORIG1CS1302NW04000b	88293.5	41440.1	10920	51240.1	Proteobacteria
ORIG1CS1302NW05000a	2.2355e+06	2.65845e+06	904190	846741	Acidobacteria
ORIG1CS1302NW06000b	228691	26102.7	0	83632.6	Proteobacteria
ORIG1CS1302NW07000c	722161	28061.5	507.136	187471	Proteobacteria
ORIG1CS1302NW08000c	675556	14730.3	2507.28	100291	Proteobacteria
ORIG1CS1302NW09000a	554544	375745	198197	658883	Actinobacteria
ORIG1CS1302NW10000a	326438	60865.4	15245.4	222979	Proteobacteria
ORIG1CS1303NW02000b	453407	41077	22878.3	235196	Proteobacteria
ORIG1CS1303NW03000c	343356	97871.8	45780.7	225687	Proteobacteria
ORIG1CS1303NW04000c	197264	167342	49823.7	110885	Proteobacteria
ORIG1CS1303NW05000c	2.59072e+06	456807	59138.5	403734	Proteobacteria
ORIG1CS1303NW06000a	1.54874e+06	358061	183313	1.40312e+06	Proteobacteria
ORIG1CS1303NW07000a	172091	106955	68430.9	196422	Actinobacteria
ORIG1CS1303NW08000a	142608	82909.1	40646.2	171245	Actinobacteria
ORIG1CS1303NW09000a	146805	1.7717e+06	3.15506e+06	360112	Chloroflexi
ORIG1CS1303NW10000c	438401	178877	37041.4	220373	Proteobacteria
ORIG1CS1308NW01000b	73495.3	37482.6	2414.85	12809.2	Proteobacteria
ORIG1CS1308NW02000a	562581	295390	215771	661275	Actinobacteria
ORIG1CS1308NW03000a	522447	342725	143886	493267	Proteobacteria
ORIG1CS1308NW04000a	512440	401272	289494	397312	Proteobacteria
ORIG1CS1308NW05000a	6.41982e+06	823125	65887.2	1.46622e+06	Proteobacteria
ORIG1CS1308NW06000b	733013	268433	134021	576720	Proteobacteria
ORIG1CS1308NW07000c	201037	21013.8	8953.08	88494.9	Proteobacteria
ORIG1CS1308NW08000c	1.03423e+06	421245	178174	1.10621e+06	Actinobacteria
ORIG1CS1308NW09000c	355340	221306	88683.8	361185	Actinobacteria
ORIG1CS1308NW10000a	4.03137e+06	564475	235499	622317	Proteobacteria
ORIG1CS1309NW01000a	171088	333776	340919	239146	Chloroflexi
ORIG1CS1309NW02000c	129132	88580	16854.3	61714.5	Proteobacteria
ORIG1CS1309NW03000b	12042.9	2573.28	0	5918.54	Proteobacteria
ORIG1CS1309NW04000a	450731	210438	64768.6	472160	Actinobacteria
ORIG1CS1309NW05000b	459457	400478	280871	732492	Actinobacteria
ORIG1CS1309NW06000a	894873	666650	1.41538e+06	239567	Chloroflexi
ORIG1CS1309NW07000a	532635	54694.7	9097.29	229762	Proteobacteria
ORIG1CS1309NW08000b	96924.7	50339	22520.1	48131.2	Proteobacteria
ORIG1CS1309NW09000b	37298.1	5374	1151.57	31284.4	Proteobacteria
ORIG1CS1316NW01000b	216064	83359.2	13393.9	50403.2	Proteobacteria
ORIG1CS1316NW02000a	266779	110206	41138.2	235822	Proteobacteria
ORIG1CS1316NW03000c	1.15466e+06	1.07251e+06	228502	758974	Proteobacteria
ORIG1CS1316NW04000a	118871	58992	37125.1	142912	Actinobacteria
ORIG1CS1316NW05000a	266112	110087	51024	226901	Proteobacteria
ORIG1CS1316NW06000b	218991	6981.94	9801.57	52901.6	Proteobacteria
ORIG1CS1316NW07000c	419685	205798	81293	400151	Proteobacteria
ORIG1CS1316NW08000b	76177.6	34765.6	1789.41	30419.9	Proteobacteria
ORIG1CS1316NW09000a	317195	341044	323853	372247	Actinobacteria
ORIG1CS1316NW10000c	486508	105779	86648.7	438120	Proteobacteria
ORIG1CS1319NW01000b	34225.8	45789.5	2326.03	24456.5	Acidobacteria
ORIG1CS1319NW02000b	13614.6	161599	58010	6215.36	Acidobacteria
ORIG1CS1319NW03000a	677060	451841	420610	571958	Proteobacteria
ORIG1CS1319NW04000c	141162	123243	19249.3	55557	Proteobacteria
ORIG1CS1319NW05000a	3.09886e+06	1.90525e+06	302738	1.14368e+06	Proteobacteria
ORIG1CS1319NW06000a	663643	1.18121e+06	986087	510356	Acidobacteria
ORIG1CS1319NW07000b	675772	241286	97029.5	469692	Proteobacteria
ORIG1CS1319NW08000a	435105	1.49253e+06	1.2782e+06	609406	Acidobacteria
ORIG1CS1319NW09000a	242533	583299	585331	304183	Chloroflexi
ORIG1CS1319NW10000a	493796	6.22463e+06	5.86319e+06	674515	Acidobacteria
ORIG1CS1322NW01000c	85244.6	83904.3	1072.26	49055.9	Proteobacteria
ORIG1CS1322NW02000a	335124	611817	692781	461156	Chloroflexi
ORIG1CS1322NW03000b	321285	456168	45795.7	62969	Acidobacteria
ORIG1CS1322NW04000a	293517	304388	131005	252060	Acidobacteria
ORIG1CS1322NW05000c	1.76268e+06	1.13285e+06	205521	455793	Proteobacteria
ORIG1CS1322NW06000c	656462	141500	47981.6	385992	Proteobacteria
ORIG1CS1322NW07000a	203861	176395	105737	222361	Actinobacteria
ORIG1CS1322NW08000c	323141	570453	216584	229222	Acidobacteria
ORIG1CS1322NW09000a	253883	129361	102179	254595	Actinobacteria
ORIG1CS1322NW10000a	527963	230330	182078	623842	Actinobacteria
ORIG1CS1327NW01000b	32576.2	51488.5	21627	26332.4	Acidobacteria
ORIG1CS1327NW02000a	143944	118272	102688	142135	Proteobacteria
ORIG1CS1327NW03000c	4.70466e+06	335032	133357	1.08052e+06	Proteobacteria
ORIG1CS1327NW04000b	44504.6	49315.9	17227.6	21379.3	Acidobacteria
ORIG1CS1327NW05000a	1.81284e+06	1.01029e+06	173950	726519	Proteobacteria
ORIG1CS1327NW06000a	1.27108e+06	576767	341288	624879	Proteobacteria
ORIG1CS1327NW07000a	3.19734e+06	351455	410574	1.06741e+06	Proteobacteria
ORIG1CS1327NW08000b	453172	104365	53769.6	199999	Proteobacteria
ORIG1CS1327NW09000a	383019	83587.7	28595.8	316753	Proteobacteria
ORIG1CS1327NW10000c	733772	87962.7	33442.7	127869	Proteobacteria
ORIG1CS1330NW01000a	219892	150796	33461.9	103428	Proteobacteria
ORIG1CS1330NW02000c	64550.2	288400	117398	75119.9	Acidobacteria
ORIG1CS1330NW03000b	167075	659303	120582	37794.4	Acidobacteria
ORIG1CS1330NW04000b	58311.4	68030	1619.76	55071.9	Acidobacteria
ORIG1CS1330NW05000c	914542	463501	127089	724324	Proteobacteria
ORIG1CS1330NW06000b	315940	7489.22	0	173471	Proteobacteria
ORIG1CS1330NW07000c	7.63959e+06	35426.4	0	1.04612e+06	Proteobacteria
ORIG1CS1330NW08000a	512637	316887	198852	292591	Proteobacteria
ORIG1CS1330NW09000b	166295	60369.4	7126.95	72108	Proteobacteria
ORIG1CS1330NW10000a	4282.14	33.1949	132.78	896.263	Proteobacteria
ORIG1CS1333NW01000b	443384	825250	272957	241514	Acidobacteria
ORIG1CS1333NW02000a	299236	379944	259224	293080	Acidobacteria
ORIG1CS1333NW03000c	377912	273624	25099.9	212112	Proteobacteria
ORIG1CS1333NW04000a	224637	1.52945e+06	2.00369e+06	353275	Chloroflexi
ORIG1CS1333NW05000a	1.77162e+06	921220	313631	838035	Proteobacteria
ORIG1CS1333NW06000a	590921	298665	91009.6	683640	Actinobacteria
ORIG1CS1333NW07000a	1.16468e+07	606799	151280	3.18864e+06	Proteobacteria
ORIG1CS1333NW08000a	1.73444e+06	254063	116858	701971	Proteobacteria
ORIG1CS1333NW09000b	445434	28164.2	1198.48	206138	Proteobacteria
ORIG1CS1333NW10000c	1.28733e+06	132786	34832.5	210684	Proteobacteria
ORIG1CS1337NW01000c	244260	398029	38442.3	182061	Acidobacteria
ORIG1CS1337NW02000b	39912.7	2910.76	1719.99	6394.85	Proteobacteria
ORIG1CS1337NW03000b	262731	265751	34728.8	141029	Acidobacteria
ORIG1CS1337NW04000b	449433	59095	18439.4	136185	Proteobacteria
ORIG1CS1337NW05000a	7.94655e+06	2.14521e+06	391982	1.88508e+06	Proteobacteria
ORIG1CS1337NW06000b	85736.2	16851.6	5124.47	54595.3	Proteobacteria
ORIG1CS1337NW07000b	1.19079e+07	3.43479e+06	2.50433e+06	1.48478e+06	Proteobacteria
ORIG1CS1337NW08000c	3.99543e+06	80851.9	38180.1	1.4763e+06	Proteobacteria
ORIG1CS1337NW09000a	377788	130146	61964.1	394298	Actinobacteria
ORIG1CS1337NW10000a	495574	635248	705308	632114	Chloroflexi
ORIG1CS1340NW01000c	23149	25383.6	2094.93	13582.1	Acidobacteria
ORIG1CS1340NW03000a	4.08701e+06	1.60112e+06	713305	4.64716e+06	Actinobacteria
ORIG1CS1340NW04000b	50364.7	2500.99	0	26303.5	Proteobacteria
ORIG1CS1340NW05000c	1.20888e+07	559975	0	680878	Proteobacteria
ORIG1CS1340NW06000c	3.76254e+06	704093	191690	3.92965e+06	Actinobacteria
ORIG1CS1340NW07000b	1.53757e+06	615909	72589.3	615909	Proteobacteria
ORIG1CS1340NW08000a	624785	320503	116428	645716	Actinobacteria
ORIG1CS1340NW09000a	981055	2.26677e+06	2.66051e+06	1.18672e+06	Chloroflexi
ORIG1CS1340NW10000b	190913	120085	50615.6	154395	Proteobacteria
ORIG1CS1340YW02000a	286816	4.03064e+06	1.02059e+07	658374	Chloroflexi
ORIG1CS1343NW01000b	60886.7	126901	2179.1	31404.7	Acidobacteria
ORIG1CS1343NW02000c	242316	179544	87168.1	152818	Proteobacteria
ORIG1CS1343NW03000b	174559	79016.2	9296.02	37184.1	Proteobacteria
ORIG1CS1343NW04000c	1.25177e+06	212565	106076	1.76268e+06	Actinobacteria
ORIG1CS1343NW05000c	3.7505e+06	803442	6640.01	1.03584e+06	Proteobacteria
ORIG1CS1343NW06000c	865878	282764	55534.7	274202	Proteobacteria
ORIG1CS1343NW07000a	739589	1.18082e+06	3.52565e+06	708493	Chloroflexi
ORIG1CS1343NW08000b	939230	29907.7	3181.67	836780	Proteobacteria
ORIG1CS1343NW09000c	258277	197389	33937.9	238314	Proteobacteria
ORIG1CS1343NW10000c	180866	60109.2	15683.6	146739	Proteobacteria
ORIG1CS1346NW01000b	71998	26307.8	19562.2	33278.3	Proteobacteria
ORIG1CS1346NW02000b	61939.1	30837.8	9752.11	26884.2	Proteobacteria
ORIG1CS1346NW03000b	1.44807e+06	1.02045e+06	311804	669771	Proteobacteria
ORIG1CS1346NW04000b	883742	35634.7	60579.1	311804	Proteobacteria
ORIG1CS1346NW05000a	6.18477e+06	3.67465e+06	642851	1.06904e+06	Proteobacteria
ORIG1CS1346NW06000a	412830	1.55994e+06	2.73047e+06	804996	Chloroflexi
ORIG1CS1346NW07000c	805028	297918	85480.1	503864	Proteobacteria
ORIG1CS1346NW08000c	897509	121365	28404.5	766184	Proteobacteria
ORIG1CS1346NW09000c	337975	57318	17511.2	179226	Proteobacteria
ORIG1CS1346NW10000b	433381	267261	11528.9	51880	Proteobacteria
ORIG1CS1355NW01000b	26816.6	42676.9	4903.86	5566.55	Acidobacteria
ORIG1CS1355NW02000c	393634	171802	84957	279650	Proteobacteria
ORIG1CS1355NW03000c	4.46247e+06	304114	53974.4	770152	Proteobacteria
ORIG1CS1355NW04000b	389037	25145.5	32689.1	384726	Proteobacteria
ORIG1CS1355NW05000c	8.71672e+06	608090	78166.5	1.09778e+06	Proteobacteria
ORIG1CS1355NW06000c	1.41857e+06	10060.8	30182.4	292413	Proteobacteria
ORIG1CS1355NW07000a	1.70753e+06	39296.7	37155.2	233425	Proteobacteria
ORIG1CS1355NW08000c	644003	15826.8	10279.3	453919	Proteobacteria
ORIG1CS1355NW09000b	71370.4	18574.5	4239.83	46840	Proteobacteria
ORIG1CS1355NW10000c	181699	27582.6	17069.1	109898	Proteobacteria
ORIG1CS1356NW01000c	206123	366610	82536.4	87558.4	Acidobacteria
ORIG1CS1356NW02000c	284894	168831	55268.1	222257	Proteobacteria
ORIG1CS1356NW04000a	2.03957e+06	153020	79654.1	498886	Proteobacteria
ORIG1CS1356NW05000a	4.75043e+06	2.23503e+06	621861	2.37827e+06	Proteobacteria
ORIG1CS1356NW06000a	408096	192980	196199	511643	Actinobacteria
ORIG1CS1356NW07000b	139235	5805.16	0	44387.1	Proteobacteria
ORIG1CS1356NW08000c	1.46339e+06	26971.3	2860.59	561492	Proteobacteria
ORIG1CS1356NW09000a	523228	162097	146950	400592	Proteobacteria
ORIG1CS1356NW10000c	795730	71085.6	17618.2	326320	Proteobacteria
ORIG1CS1356YW03000a	919725	581776	268616	617798	Proteobacteria
