# Supplementary material
Source: Frontiers journal article supplement (https://www.frontiersin.org/articles/478841)
Supplement: Data_Sheet_5.zip [file Table 4.XLSX]

## Sheet: summary_threemajorphyla_perline
Table S4. Summary of the number of reads for the three major bacterial phyla (Acidobacteria, Actinobacteria, and Proteobacteria) in each of the sixteen B. napus genotypes in 2016 experiment. N (number of samples for each line), average, minimum, maximum, and total reads are presented.
CanolaLine	Phylum	N	Average_Abundace	Minimum	Maximum	Total
NAM-0	Acidobacteria	28	213053	3252.66	1.7717e+06	5.96549e+06
	Actinobacteria		359576	21953.3	1.7499e+06	1.00681e+07
	Proteobacteria		1.37052e+06	35659	2.47149e+07	3.83745e+07
NAM-13	Acidobacteria	30	496696	21013.8	4.7413e+06	1.49009e+07
	Actinobacteria		473221	12809.2	3.04208e+06	1.41966e+07
	Proteobacteria		1.33691e+06	73495.3	1.20033e+07	4.01074e+07
NAM-14	Acidobacteria	30	572675	6013.2	5.23112e+06	1.71802e+07
	Actinobacteria		449479	15107.3	4.6794e+06	1.34844e+07
	Proteobacteria		878845	44053.3	7.71238e+06	2.63654e+07
NAM-17	Acidobacteria	30	451413	33.1949	5.73692e+06	1.35424e+07
	Actinobacteria		417993	896.263	4.39034e+06	1.25398e+07
	Proteobacteria		984696	4282.14	7.63959e+06	2.95409e+07
NAM-23	Acidobacteria	30	468908	2910.76	3.43479e+06	1.40672e+07
	Actinobacteria		388016	0	1.88508e+06	1.16405e+07
	Proteobacteria		1.22281e+06	0	1.19079e+07	3.66843e+07
NAM-30	Acidobacteria	30	308982	0	1.73719e+06	9.26945e+06
	Actinobacteria		429462	11762	2.78078e+06	1.28839e+07
	Proteobacteria		877517	23492.3	8.23886e+06	2.63255e+07
NAM-32	Acidobacteria	30	499683	26307.8	3.67465e+06	1.49905e+07
	Actinobacteria		538711	12581.9	1.93938e+06	1.61613e+07
	Proteobacteria		1.06217e+06	56921.3	6.18477e+06	3.18652e+07
NAM-37	Acidobacteria	30	403858	0	4.59269e+06	1.21157e+07
	Actinobacteria		473648	2124.97	2.10715e+06	1.42094e+07
	Proteobacteria		855074	8716	4.54396e+06	2.56522e+07
NAM-43	Acidobacteria	30	835635	15052.2	1.28905e+07	2.5069e+07
	Actinobacteria		656519	37240.3	6.03467e+06	1.96956e+07
	Proteobacteria		1.10614e+06	54745.5	1.16468e+07	3.31843e+07
NAM-46	Acidobacteria	30	3.23916e+06	2500.99	8.38435e+07	9.71749e+07
	Actinobacteria		2.10727e+06	13582.1	3.29367e+07	6.3218e+07
	Proteobacteria		7.54617e+06	23149	1.66974e+08	2.26385e+08
NAM-48	Acidobacteria	30	570336	8858.35	6.22463e+06	1.71101e+07
	Actinobacteria		372780	6215.36	1.46705e+06	1.11834e+07
	Proteobacteria		694238	13614.6	3.09886e+06	2.08271e+07
NAM-5	Acidobacteria	30	395991	104.282	2.65845e+06	1.18797e+07
	Actinobacteria		316058	5243.91	1.32833e+06	9.48175e+06
	Proteobacteria		802338	10175	6.09609e+06	2.40701e+07
NAM-72	Acidobacteria	29	893498	2573.28	1.14201e+07	2.59114e+07
	Actinobacteria		358027	5918.54	1.60993e+06	1.03828e+07
	Proteobacteria		506312	12042.9	1.80337e+06	1.4683e+07
NAM-76	Acidobacteria	30	298338	21434.4	2.732e+06	8.95014e+06
	Actinobacteria		408930	14570.3	2.30212e+06	1.22679e+07
	Proteobacteria		1.17604e+06	32576.2	1.52409e+07	3.52813e+07
NAM-79	Acidobacteria	30	155333	10060.8	1.05883e+06	4.66e+06
	Actinobacteria		396914	5566.55	2.18263e+06	1.19074e+07
	Proteobacteria		1.46569e+06	26816.6	1.71492e+07	4.39708e+07
YN04-C1213	Acidobacteria	30	326227	5805.16	2.23503e+06	9.7868e+06
	Actinobacteria		413998	31828.1	2.37827e+06	1.24199e+07
	Proteobacteria		880756	36793.3	5.40909e+06	2.64227e+07
