# Supplementary material
Source: Frontiers journal article supplement (https://www.frontiersin.org/articles/478841)
Supplement: Data_Sheet_5.zip [file Table 5.XLSX]

## Sheet: Table S5_prev_abund_2016-17
Table S5. B. napus core bacterial taxa identified at three sites and two years with their corresponding prevalence and relative abundances (relative to total number of reads observed at each site or location).
2016 Llewellen
Phylum	Class	Order	Family	Genus	Species	P (%)	Relative Abundace (%)
Proteobacteria	Gammaproteobacteria	Xanthomonadales	Xanthomonadaceae	Stenotrophomonas	retroflexus	75.4717	6.29489
Actinobacteria	Actinobacteria	Actinomycetales	Micrococcaceae	Arthrobacter		96.6457	3.34202
Acidobacteria	Chloracidobacteria	RB41	Ellin6075	unclassified		80.0839	1.02112
Proteobacteria	Alphaproteobacteria	Rhizobiales	Bradyrhizobiaceae	Bradyrhizobium		95.3878	0.982035
Proteobacteria	Alphaproteobacteria	Rhodospirillales	Rhodospirillaceae	Skermanella		78.1971	0.540456
Actinobacteria	Thermoleophilia	Gaiellales	Gaiellaceae	unclassified		75.891	0.421369
2017 Llewellen
Phylum	Class	Order	Family	Genus	Species	Prevalence (%)	Relative Abundace (%)
Proteobacteria	Gammaproteobacteria	Pseudomonadales	Pseudomonadaceae	Pseudomonas		87.4126	9.57341
Proteobacteria	Gammaproteobacteria	Xanthomonadales	Xanthomonadaceae	Stenotrophomonas	retroflexus	93.007	7.474
Proteobacteria	Gammaproteobacteria	Enterobacteriales	Enterobacteriaceae	Erwinia		90.9091	4.66055
Proteobacteria	Gammaproteobacteria	Enterobacteriales	Enterobacteriaceae	Erwinia		95.1049	4.02373
Bacteroidetes	Sphingobacteriia	Sphingobacteriales	Sphingobacteriaceae	Pedobacter		91.6084	3.13682
Proteobacteria	Gammaproteobacteria	Xanthomonadales	Xanthomonadaceae	Stenotrophomonas	maltophilia	82.5175	2.61983
Actinobacteria	Actinobacteria	Actinomycetales	Micrococcaceae	Arthrobacter		98.6014	2.50621
Proteobacteria	Alphaproteobacteria	Sphingomonadales	Sphingomonadaceae	Kaistobacter		88.8112	0.524277
Proteobacteria	Alphaproteobacteria	Rhizobiales	Bradyrhizobiaceae	Bradyrhizobium		76.2238	0.365582
Actinobacteria	Actinobacteria	Actinomycetales	Propionibacteriaceae	Microlunatus		89.5105	0.280382
Bacteroidetes	Sphingobacteriia	Sphingobacteriales	Sphingobacteriaceae	unclassified		77.6224	0.258886
2017 Melfort
Phylum	Class	Order	Family	Genus	Species
Proteobacteria	Gammaproteobacteria	Xanthomonadales	Xanthomonadaceae	Stenotrophomonas	retroflexus	90.7801	11.217
Proteobacteria	Gammaproteobacteria	Enterobacteriales	Enterobacteriaceae	Erwinia		90.0709	7.08876
Proteobacteria	Gammaproteobacteria	Enterobacteriales	Enterobacteriaceae	Erwinia		91.4894	6.75466
Actinobacteria	Actinobacteria	Actinomycetales	Micrococcaceae	Arthrobacter		92.9078	2.65301
Bacteroidetes	Sphingobacteriia	Sphingobacteriales	Sphingobacteriaceae	Pedobacter		78.0142	2.4275
Actinobacteria	Actinobacteria	Actinomycetales	Propionibacteriaceae	Microlunatus		92.9078	0.877585
Proteobacteria	Betaproteobacteria	Burkholderiales	Comamonadaceae	Variovorax	paradoxus	75.8865	0.705201
Actinobacteria	Actinobacteria	Actinomycetales	Micrococcaceae	Arthrobacter		90.7801	0.622534
Proteobacteria	Alphaproteobacteria	Sphingomonadales	Sphingomonadaceae	Kaistobacter		89.3617	0.488676
Proteobacteria	Alphaproteobacteria	Rhizobiales	Bradyrhizobiaceae	Bradyrhizobium		83.6879	0.370337
Actinobacteria	Actinobacteria	Actinomycetales	Nocardiaceae	Rhodococcus		76.5957	0.333136
Actinobacteria	Actinobacteria	Micrococcales	unclassified	unclassified		85.1064	0.317099
Bacteroidetes	Sphingobacteriia	Sphingobacteriales	Sphingobacteriaceae	Mucilaginibacter	gossypii	83.6879	0.271586
Actinobacteria	Thermoleophilia	Gaiellales	Gaiellaceae	unclassified		75.8865	0.25235
Actinobacteria	Thermoleophilia	Gaiellales	Gaiellaceae	unclassified		78.0142	0.20214
Proteobacteria	Alphaproteobacteria	Rhizobiales	Hyphomicrobiaceae	Rhodoplanes		78.7234	0.194822
Bacteroidetes	Sphingobacteriia	Sphingobacteriales	Sphingobacteriaceae	unclassified		84.3972	0.193672
Planctomycetes	Phycisphaerae	WD2101	unclassified	unclassified		76.5957	0.167969
Proteobacteria	Alphaproteobacteria	Caulobacterales	Caulobacteraceae	Caulobacter		82.2695	0.157648
Proteobacteria	Betaproteobacteria	SC-I-84	unclassified	unclassified		76.5957	0.154013
Gemmatimonadetes	Gemmatimonadetes	unclassified	unclassified	unclassified		75.8865	0.117704
2017 Scot
Phylum	Class	Order	Family	Genus	Species
Proteobacteria	Gammaproteobacteria	Xanthomonadales	Xanthomonadaceae	Stenotrophomonas	retroflexus	88.0952	9.52952
Actinobacteria	Actinobacteria	Actinomycetales	Micrococcaceae	Arthrobacter		87.3016	2.62041
Proteobacteria	Gammaproteobacteria	Enterobacteriales	Enterobacteriaceae	Erwinia		88.0952	2.4187
Proteobacteria	Gammaproteobacteria	Enterobacteriales	Enterobacteriaceae	Erwinia		79.3651	1.46365
Bacteroidetes	Sphingobacteriia	Sphingobacteriales	Sphingobacteriaceae	Pedobacter		82.5397	1.40726
Proteobacteria	Alphaproteobacteria	Sphingomonadales	Sphingomonadaceae	Kaistobacter		84.127	0.775714
Firmicutes	Bacilli	Bacillales	Bacillaceae	Bacillus	longiquaesitum	83.3333	0.419035
