# Supplementary material
Source: Frontiers journal article supplement (https://www.frontiersin.org/articles/478841)
Supplement: Data_Sheet_5.zip [file Table 6.XLSX]

## Sheet: Caption
Table S6. List of differentially abundant bacterial taxa in each B. napus line (named separate sheets) compared with the reference (NAM-0) and their associated log fold change (logFC), log count per million (logCPM), false discovery rate (FDR) and p-value.

## Sheet: NAM-13
Phylum	Class	Order	Family	Genus	Species	logFC	logCPM	F	PValue	FDR
Proteobacteria	Alphaproteobacteria	Rhodospirillales	Rhodospirillaceae	Dongia	NA	-8.56396	5.40914	102.101	5.49656e-22	3.06708e-19
Proteobacteria	Alphaproteobacteria	Sphingomonadales	Sphingomonadaceae	Sphingobium	NA	-8.04786	4.8835	99.2247	1.845e-21	5.14756e-19
Actinobacteria	Actinobacteria	Actinomycetales	Streptosporangiaceae	Nonomuraea	NA	-8.36931	5.4832	93.2234	2.35381e-20	4.37809e-18
Actinobacteria	Actinobacteria	Actinomycetales	Actinosynnemataceae	Saccharothrix	NA	7.56785	4.85259	90.6475	7.07975e-20	9.87625e-18
Actinobacteria	Actinobacteria	Actinomycetales	Thermomonosporaceae	Actinocorallia	NA	8.19077	5.61016	89.9962	9.36048e-20	1.04463e-17
Proteobacteria	Betaproteobacteria	Procabacteriales	Procabacteriaceae	Procabacter	NA	6.70809	4.06565	79.8111	7.70059e-18	7.16155e-16
Firmicutes	Bacilli	Bacillales	Thermoactinomycetaceae	unclassified	NA	-6.11467	3.13557	77.9497	1.73958e-17	1.38669e-15
Actinobacteria	Actinobacteria	Actinomycetales	Actinosynnemataceae	Kibdelosporangium	NA	-7.32612	6.74856	70.5752	4.51707e-16	3.15066e-14
Chloroflexi	TK10	AKYG885	5B-12	unclassified	NA	-5.47086	2.66365	69.7625	6.48575e-16	4.02117e-14
Actinobacteria	Actinobacteria	Actinomycetales	Williamsiaceae	Williamsia	NA	-6.52783	4.81226	68.3561	1.21448e-15	6.7768e-14
Proteobacteria	Betaproteobacteria	Burkholderiales	Comamonadaceae	Hylemonella	NA	8.85873	6.82617	68.0437	1.39639e-15	7.08349e-14
Proteobacteria	Betaproteobacteria	Burkholderiales	Comamonadaceae	Ramlibacter	NA	-8.0626	7.86239	64.2355	7.70786e-15	3.58415e-13
Proteobacteria	Gammaproteobacteria	Vibrionales	Vibrionaceae	Listonella	NA	-8.63127	6.20189	60.5448	4.08616e-14	1.75391e-12
Proteobacteria	Gammaproteobacteria	Pseudomonadales	Moraxellaceae	Perlucidibaca	NA	-5.68669	3.73967	57.9603	1.32374e-13	5.27603e-12
Actinobacteria	Actinobacteria	Actinomycetales	Promicromonosporaceae	Cellulosimicrobium	NA	7.5141	7.72194	54.9114	5.33958e-13	1.94027e-11
Elusimicrobia	Elusimicrobia	FAC88	unclassified	unclassified	NA	6.35749	5.19066	54.8018	5.61502e-13	1.94027e-11
MVP-21	unclassified	unclassified	unclassified	unclassified	NA	-5.9671	4.4149	54.6898	5.91123e-13	1.94027e-11
Proteobacteria	Alphaproteobacteria	Rhodospirillales	Rhodospirillaceae	Inquilinus	NA	5.71801	4.29925	53.8899	8.53704e-13	2.64648e-11
Proteobacteria	Deltaproteobacteria	Myxococcales	Polyangiaceae	Chondromyces	NA	-8.60227	9.94347	53.2438	1.14926e-12	3.3752e-11
Chloroflexi	Chloroflexi	Chloroflexales	unclassified	unclassified	NA	6.59424	5.09899	52.3177	1.76125e-12	4.91389e-11
Proteobacteria	Gammaproteobacteria	Chromatiales	Chromatiaceae	unclassified	NA	5.17531	3.24481	49.9719	5.21266e-12	1.38508e-10
Gemmatimonadetes	unclassified	unclassified	unclassified	unclassified	NA	-8.43763	7.04275	49.4629	6.60126e-12	1.67432e-10
Bacteroidetes	Bac22	unclassified	unclassified	unclassified	NA	-5.79467	5.42918	49.2909	7.15027e-12	1.73472e-10
Elusimicrobia	Elusimicrobia	MVP-88	unclassified	unclassified	NA	4.5091	2.36019	48.1379	1.22226e-11	2.84175e-10
Proteobacteria	Alphaproteobacteria	Sphingomonadales	unclassified	unclassified	NA	-9.50118	12.173	47.9775	1.31704e-11	2.93964e-10
Elusimicrobia	Elusimicrobia	IIb	unclassified	unclassified	NA	-6.36929	5.37591	46.7781	2.30423e-11	4.94524e-10
Actinobacteria	Actinobacteria	Actinomycetales	Pseudonocardiaceae	Amycolatopsis	NA	-8.75845	8.6156	46.2501	2.94901e-11	6.09462e-10
Armatimonadetes	Chthonomonadetes	Chthonomonadales	Chthonomonadaceae	unclassified	NA	-4.70214	3.1175	44.7766	5.88004e-11	1.17181e-09
Proteobacteria	Deltaproteobacteria	Myxococcales	Cystobacterineae	unclassified	NA	-5.1625	4.44125	44.2336	7.58703e-11	1.45985e-09
Proteobacteria	Alphaproteobacteria	Rhizobiales	Xanthobacteraceae	unclassified	NA	5.05684	4.03735	42.8407	1.46101e-10	2.71748e-09
Chloroflexi	TK10	AKYG885	unclassified	unclassified	NA	8.03194	7.34665	41.791	2.39724e-10	4.31504e-09
Actinobacteria	Actinobacteria	Actinomycetales	Cryptosporangiaceae	unclassified	NA	-8.31995	8.65653	41.2256	3.13165e-10	5.46082e-09
Proteobacteria	Gammaproteobacteria	Xanthomonadales	Xanthomonadaceae	Dyella	NA	8.1946	7.97976	41.059	3.38835e-10	5.59986e-09
Proteobacteria	Deltaproteobacteria	Myxococcales	Polyangiaceae	Polyangium	NA	6.27055	6.42766	41.0443	3.4121e-10	5.59986e-09
Proteobacteria	Betaproteobacteria	A21b	UD5	unclassified	NA	4.59726	4.03321	39.8422	6.03089e-10	9.61496e-09
Proteobacteria	Deltaproteobacteria	Myxococcales	Polyangiaceae	Aetherobacter	NA	9.02935	9.05663	39.4042	7.42508e-10	1.15089e-08
Acidobacteria	BPC102	unclassified	unclassified	unclassified	NA	3.94815	2.0336	39.2642	7.93568e-10	1.19679e-08
FBP	unclassified	unclassified	unclassified	unclassified	NA	3.94792	2.03347	38.8664	9.58791e-10	1.40791e-08
Verrucomicrobia	unclassified	unclassified	unclassified	unclassified	NA	-7.70483	7.61152	38.109	1.37505e-09	1.96738e-08
Fibrobacteres	Fibrobacteria	258ds10	unclassified	unclassified	NA	-5.66517	5.61788	37.9539	1.48053e-09	2.019e-08
Planctomycetes	Pla4	unclassified	unclassified	unclassified	NA	3.80663	1.96155	37.9497	1.48349e-09	2.019e-08
Proteobacteria	Alphaproteobacteria	Rhizobiales	Methylobacteriaceae	Methylobacterium	NA	-8.12937	8.4303	37.6843	1.68367e-09	2.23687e-08
Proteobacteria	Alphaproteobacteria	Rhizobiales	Rhizobiaceae	Kaistia	NA	7.93674	7.45686	37.5688	1.77903e-09	2.3086e-08
Proteobacteria	Alphaproteobacteria	Sphingomonadales	Sphingomonadaceae	Novosphingobium	NA	10.4388	9.5589	37.5084	1.83107e-09	2.32213e-08
Proteobacteria	Deltaproteobacteria	Myxococcales	Myxococcaceae	Myxococcus	NA	7.43295	7.31664	37.3287	1.99509e-09	2.47391e-08
Actinobacteria	Actinobacteria	Actinomycetales	Geodermatophilaceae	Blastococcus	NA	-7.29694	7.11571	36.9562	2.38358e-09	2.89139e-08
Proteobacteria	Alphaproteobacteria	Rhizobiales	Brucellaceae	Ochrobactrum	NA	-9.27762	10.0688	36.5712	2.86526e-09	3.40173e-08
Bacteroidetes	Saprospirae	Saprospirales	Chitinophagaceae	Niastella	NA	-7.04697	7.09393	36.4384	3.0533e-09	3.53692e-08
Nitrospirae	Nitrospira	Nitrospirales	Nitrospiraceae	JG37-AG-70	NA	-7.88683	7.50526	36.3609	3.16857e-09	3.53692e-08
Chloroflexi	Anaerolineae	SBR1031	SJA-101	unclassified	NA	7.30713	7.42651	36.3421	3.19725e-09	3.53692e-08
Actinobacteria	Actinobacteria	Actinomycetales	Microbacteriaceae	Mycetocola	NA	-6.35215	7.73208	36.3191	3.23267e-09	3.53692e-08
Proteobacteria	Deltaproteobacteria	Myxococcales	Myxococcaceae	Corallococcus	NA	-4.4587	5.64728	36.219	3.39131e-09	3.63914e-08
Proteobacteria	Alphaproteobacteria	Sphingomonadales	Sphingomonadaceae	Sphingosinicella	NA	-4.286	2.93816	35.7691	4.20685e-09	4.4291e-08
TM7	SC3	unclassified	unclassified	unclassified	NA	-5.2317	4.78373	35.5329	4.71143e-09	4.86848e-08
Acidobacteria	BPC102	MVS-40	unclassified	unclassified	NA	-8.05987	8.40541	34.1058	9.35248e-09	9.48851e-08
Actinobacteria	Actinobacteria	Actinomycetales	Cellulomonadaceae	Cellulomonas	NA	9.96737	10.2266	34.0188	9.75286e-09	9.71802e-08
Chloroflexi	Anaerolineae	CFB-26	unclassified	unclassified	NA	-5.94933	6.17728	33.9601	1.00324e-08	9.82115e-08
Actinobacteria	Actinobacteria	Actinomycetales	Micromonosporaceae	Micromonospora	NA	10.1	10.5711	33.7157	1.12857e-08	1.08577e-07
Proteobacteria	Deltaproteobacteria	Myxococcales	OM27	unclassified	NA	8.56926	8.43689	33.1734	1.46585e-08	1.38634e-07
Proteobacteria	Deltaproteobacteria	Myxococcales	Nannocystaceae	Plesiocystis	NA	-7.50915	7.53465	32.5396	1.99076e-08	1.85141e-07
Actinobacteria	Actinobacteria	Actinomycetales	Kineosporiaceae	Kineosporia	NA	-3.41081	1.55409	32.3821	2.14825e-08	1.96512e-07
Verrucomicrobia	Spartobacteria	Chthoniobacterales	Chthoniobacteraceae	Ellin506	NA	-9.57586	10.7914	31.8067	2.83813e-08	2.55432e-07
Actinobacteria	Actinobacteria	Actinomycetales	Nocardioidaceae	Nocardioides	NA	8.65917	10.5276	31.3247	3.58491e-08	3.1752e-07
Chloroflexi	Anaerolineae	H39	unclassified	unclassified	NA	-4.03295	3.71862	31.2829	3.65838e-08	3.18965e-07
Actinobacteria	Actinobacteria	Actinomycetales	Micromonosporaceae	Actinoplanes	NA	-7.33712	8.28274	30.4398	5.50912e-08	4.72936e-07
Bacteroidetes	Saprospirae	Saprospirales	Chitinophagaceae	Lacibacter	NA	-6.64245	7.33903	30.073	6.58513e-08	5.51803e-07
Actinobacteria	Actinobacteria	Actinomycetales	Propionibacteriaceae	unclassified	NA	5.71112	8.3542	30.0604	6.62559e-08	5.51803e-07
WS3	PRR-12	Sediment-1	unclassified	unclassified	NA	-8.95015	10.5986	28.4107	1.48153e-07	1.21572e-06
Bacteroidetes	Cytophagia	Cytophagales	Cytophagaceae	Pontibacter	NA	-4.44189	5.9462	28.0943	1.72954e-07	1.39867e-06
Planctomycetes	Phycisphaerae	CPla-3	unclassified	unclassified	NA	6.15814	6.69394	28.0246	1.78957e-07	1.42654e-06
Chloroflexi	unclassified	unclassified	unclassified	unclassified	NA	-5.56982	7.77366	27.6801	2.11849e-07	1.66447e-06
Proteobacteria	Deltaproteobacteria	MIZ46	unclassified	unclassified	NA	5.54043	6.26726	27.6522	2.1477e-07	1.66447e-06
Proteobacteria	Alphaproteobacteria	Rhizobiales	Brucellaceae	unclassified	NA	10.4211	11.4221	27.4364	2.3874e-07	1.82489e-06
Verrucomicrobia	Opitutae	Opitutales	Opitutaceae	Opitutus	NA	-5.88537	7.02305	26.7336	3.37098e-07	2.5419e-06
Bacteroidetes	Cytophagia	Cytophagales	Cytophagaceae	Rhodocytophaga	NA	5.10712	5.67016	26.688	3.44737e-07	2.56484e-06
Bacteroidetes	Sphingobacteriia	Sphingobacteriales	Sphingobacteriaceae	Mucilaginibacter	NA	-5.86504	6.78152	26.516	3.75163e-07	2.75449e-06
Bacteroidetes	Flavobacteriia	Flavobacteriales	Cryomorphaceae	Crocinitomix	NA	3.10165	1.64658	26.4283	3.91686e-07	2.83845e-06
Chloroflexi	TK10	WMSP1	FFCH4570	unclassified	NA	4.76279	5.03048	26.0554	4.70599e-07	3.36659e-06
Proteobacteria	Deltaproteobacteria	Myxococcales	Nannocystaceae	Nannocystis	NA	8.75153	9.98392	25.7855	5.37533e-07	3.79675e-06
Actinobacteria	Thermoleophilia	Solirubrobacterales	Conexibacteraceae	unclassified	NA	-6.14084	8.247	24.8681	8.45409e-07	5.89673e-06
Actinobacteria	Actinobacteria	Actinomycetales	Frankiaceae	unclassified	NA	8.89863	12.1297	24.7903	8.78596e-07	6.05255e-06
Actinobacteria	Actinobacteria	Actinomycetales	Streptomycetaceae	unclassified	NA	9.21253	11.9956	24.6248	9.53509e-07	6.48851e-06
Chloroflexi	TK10	AKYG885	23	unclassified	NA	-4.1364	5.81413	23.452	1.70537e-06	1.1465e-05
Chloroflexi	Anaerolineae	A31	S47	unclassified	NA	-7.00777	8.91294	22.9282	2.21261e-06	1.46981e-05
Proteobacteria	Alphaproteobacteria	Caulobacterales	Caulobacteraceae	unclassified	NA	-7.62518	9.75568	22.7567	2.40976e-06	1.58194e-05
Proteobacteria	Betaproteobacteria	Nitrosomonadales	Nitrosomonadaceae	Nitrosospira	NA	-3.74989	4.50035	22.5366	2.68892e-06	1.74467e-05
Bacteroidetes	unclassified	unclassified	unclassified	unclassified	NA	-6.67622	8.43028	22.2709	3.06971e-06	1.96885e-05
Chloroflexi	Anaerolineae	SBR1031	oc28	unclassified	NA	-3.30398	3.35181	22.2248	3.14109e-06	1.99173e-05
Proteobacteria	Gammaproteobacteria	Pseudomonadales	Pseudomonadaceae	unclassified	NA	-5.71273	6.92702	21.5825	4.32911e-06	2.71421e-05
GAL15	unclassified	unclassified	unclassified	unclassified	NA	3.40693	4.23164	21.2287	5.16712e-06	3.17509e-05
Proteobacteria	Deltaproteobacteria	Bdellovibrionales	Bacteriovoracaceae	unclassified	NA	5.57669	8.06363	21.2245	5.17801e-06	3.17509e-05
Cyanobacteria	ML635J-21	unclassified	unclassified	unclassified	NA	7.2952	11.2362	20.5719	7.18182e-06	4.35593e-05
Proteobacteria	Gammaproteobacteria	Xanthomonadales	Xanthomonadaceae	Aspromonas	NA	2.57263	1.46038	18.9634	1.61406e-05	9.68439e-05
Proteobacteria	Alphaproteobacteria	Sphingomonadales	Erythrobacteraceae	Porphyrobacter	NA	2.8054	3.16435	18.5969	1.94256e-05	0.000115314
Thermi	Deinococci	Deinococcales	Trueperaceae	unclassified	NA	-3.65407	5.49944	18.1596	2.4241e-05	0.000142384
Bacteroidetes	Flavobacteriia	Flavobacteriales	Weeksellaceae	unclassified	NA	-5.46994	9.18405	17.0512	4.25706e-05	0.000247442
Proteobacteria	Alphaproteobacteria	Rhodospirillales	Acetobacteraceae	Roseomonas	NA	-6.58566	11.2513	16.8307	4.76331e-05	0.000274013
Proteobacteria	Alphaproteobacteria	Rhizobiales	Methylobacteriaceae	unclassified	NA	3.41461	5.8263	15.5138	9.34189e-05	0.000531916
Firmicutes	Bacilli	Bacillales	unclassified	unclassified	NA	-3.54371	5.39191	15.2409	0.000107474	0.000605763
Bacteroidetes	Flavobacteriia	Flavobacteriales	Cryomorphaceae	unclassified	NA	3.74926	5.5055	15.1764	0.000111094	0.000619904
Actinobacteria	Actinobacteria	Actinomycetales	Actinosynnemataceae	unclassified	NA	3.91237	6.44869	14.8223	0.000133297	0.000736433
WS2	SHA-109	unclassified	unclassified	unclassified	NA	-4.54173	7.4353	14.4562	0.000160984	0.000880677
Actinobacteria	Thermoleophilia	Solirubrobacterales	Patulibacteraceae	unclassified	NA	-4.3708	8.22001	14.2009	0.000183678	0.000995071
Verrucomicrobia	Methylacidiphilae	Methylacidiphilales	LD19	unclassified	NA	3.41348	6.69323	13.4968	0.000264493	0.00141911
WS3	PRR-12	LD1-PA13	unclassified	unclassified	NA	-2.69501	5.09027	13.4762	0.000267323	0.00142063
Proteobacteria	Gammaproteobacteria	Xanthomonadales	Xanthomonadaceae	Dokdonella	NA	4.93451	9.10533	13.4208	0.00027513	0.00144833
Proteobacteria	unclassified	unclassified	unclassified	unclassified	NA	-4.22806	8.16645	12.1453	0.000534937	0.00278967
Chlorobi	OPB56	unclassified	unclassified	unclassified	NA	3.89202	10.0806	11.7552	0.000656321	0.00339099
Gemmatimonadetes	Gemmatimonadetes	Ellin5290	unclassified	unclassified	NA	-4.05498	8.41553	11.7299	0.000665102	0.00340483
Proteobacteria	Deltaproteobacteria	Bdellovibrionales	Bdellovibrionaceae	Bdellovibrio	NA	4.0098	7.83264	11.6922	0.000678409	0.00342708
Proteobacteria	Alphaproteobacteria	Rhodobacterales	Rhodobacteraceae	unclassified	NA	-2.64754	5.8974	11.6829	0.000681732	0.00342708
Planctomycetes	Planctomycetia	Pirellulales	Pirellulaceae	unclassified	NA	-3.84787	7.1087	11.1708	0.000892535	0.00444674
Proteobacteria	Betaproteobacteria	Burkholderiales	Alcaligenaceae	unclassified	NA	-4.75818	11.5814	10.6315	0.00118678	0.00586036
Bacteroidetes	Saprospirae	Saprospirales	unclassified	unclassified	NA	-2.77699	5.24351	10.1009	0.00157277	0.00769828

## Sheet: NAM-14
Phylum	Class	Order	Family	Genus	Species	logFC	logCPM	F	PValue	FDR
Actinobacteria	Actinobacteria	Actinomycetales	Nakamurellaceae	unclassified	NA	9.97988	7.18956	112.895	6.16403e-24	3.43953e-21
Bacteroidetes	Rhodothermi	Rhodothermales	Rhodothermaceae	Rubricoccus	NA	8.40155	5.64416	102.338	4.97587e-22	1.38827e-19
Proteobacteria	Alphaproteobacteria	Rhodospirillales	Rhodospirillaceae	Dongia	NA	-8.40107	5.40914	99.8959	1.39011e-21	2.5856e-19
Proteobacteria	Alphaproteobacteria	Sphingomonadales	Sphingomonadaceae	Sphingobium	NA	-7.88181	4.8835	96.8707	4.99271e-21	6.96482e-19
Actinobacteria	Actinobacteria	Actinomycetales	Streptosporangiaceae	Nonomuraea	NA	-8.20683	5.4832	91.1511	5.70625e-20	6.36817e-18
Firmicutes	Clostridia	Clostridiales	Veillonellaceae	Veillonella	NA	7.36691	4.66353	88.6042	1.70201e-19	1.58287e-17
Firmicutes	Clostridia	Clostridiales	Tissierellaceae	Anaerococcus	NA	7.0978	4.41582	85.2662	7.18298e-19	5.72586e-17
Firmicutes	Bacilli	Bacillales	Planococcaceae	Sporosarcina	NA	6.62914	3.99554	79.8178	7.67828e-18	5.2982e-16
Proteobacteria	Betaproteobacteria	Burkholderiales	Alcaligenaceae	Pigmentiphaga	NA	10.751	8.40148	79.573	8.54548e-18	5.2982e-16
Proteobacteria	Betaproteobacteria	Burkholderiales	Comamonadaceae	Polaromonas	NA	6.33528	3.79538	78.352	1.45831e-17	8.1374e-16
Firmicutes	Bacilli	Bacillales	Thermoactinomycetaceae	unclassified	NA	-5.93504	3.13557	75.1215	6.03346e-17	3.01696e-15
Proteobacteria	Deltaproteobacteria	Myxococcales	Haliangiaceae	Haliangium	NA	7.27982	4.84498	74.9567	6.48809e-17	3.01696e-15
Actinobacteria	unclassified	unclassified	unclassified	unclassified	NA	8.93404	6.51923	71.393	3.14071e-16	1.34809e-14
Actinobacteria	Actinobacteria	Actinomycetales	Actinosynnemataceae	Kibdelosporangium	NA	-7.37919	6.74856	70.9394	3.8419e-16	1.53127e-14
Proteobacteria	Alphaproteobacteria	Rhodobacterales	Hyphomonadaceae	Woodsholea	NA	7.22319	5.16528	70.6599	4.35007e-16	1.61823e-14
Proteobacteria	Alphaproteobacteria	Rhodobacterales	Rhodobacteraceae	unclassified	NA	-8.43637	5.8974	67.8097	1.55041e-15	5.40706e-14
Chloroflexi	TK10	AKYG885	5B-12	unclassified	NA	-5.30086	2.66365	66.9417	2.28629e-15	7.50443e-14
Actinobacteria	Actinobacteria	Actinomycetales	Corynebacteriaceae	Corynebacterium	NA	6.45545	4.07845	66.702	2.54543e-15	7.89084e-14
Actinobacteria	Actinobacteria	Actinomycetales	Williamsiaceae	Williamsia	NA	-6.36131	4.81226	66.1984	3.19015e-15	9.36896e-14
Elusimicrobia	Elusimicrobia	FAC88	unclassified	unclassified	NA	7.24026	5.19066	66.0531	3.40511e-15	9.50025e-14
Firmicutes	Bacilli	Lactobacillales	Streptococcaceae	Streptococcus	NA	7.72512	5.97567	63.2739	1.18892e-14	3.15912e-13
Proteobacteria	Betaproteobacteria	Burkholderiales	Comamonadaceae	Ramlibacter	NA	-7.91642	7.86239	62.7773	1.48761e-14	3.77312e-13
Proteobacteria	Betaproteobacteria	Neisseriales	Neisseriaceae	Neisseria	NA	5.21317	2.8787	59.5419	6.44294e-14	1.56311e-12
Proteobacteria	Gammaproteobacteria	Vibrionales	Vibrionaceae	Listonella	NA	-8.47526	6.20189	59.2276	7.4327e-14	1.7281e-12
Firmicutes	Bacilli	Lactobacillales	Carnobacteriaceae	Granulicatella	NA	5.17682	2.81103	58.2276	1.17189e-13	2.61566e-12
Proteobacteria	Betaproteobacteria	Burkholderiales	Comamonadaceae	Leptothrix	NA	7.71273	5.84748	57.5971	1.56226e-13	3.35285e-12
Proteobacteria	Gammaproteobacteria	Pseudomonadales	Moraxellaceae	Perlucidibaca	NA	-5.5119	3.73967	55.678	3.75705e-13	7.62526e-12
Actinobacteria	Actinobacteria	Actinomycetales	Micromonosporaceae	Pilimelia	NA	-8.73036	7.49493	55.6318	3.83739e-13	7.62526e-12
Verrucomicrobia	Pedosphaerae	Pedosphaerales	OPB35	unclassified	NA	4.96685	2.66077	55.5616	3.96295e-13	7.62526e-12
Actinobacteria	Actinobacteria	Actinomycetales	Micrococcaceae	unclassified	NA	7.11702	6.41581	55.3546	4.35732e-13	8.10461e-12
Proteobacteria	Gammaproteobacteria	Xanthomonadales	Xanthomonadaceae	Achromobacter	NA	10.8104	8.54979	53.1657	1.19139e-12	2.14451e-11
MVP-21	unclassified	unclassified	unclassified	unclassified	NA	-5.80445	4.4149	52.7811	1.42235e-12	2.48023e-11
Bacteroidetes	Flavobacteriia	Flavobacteriales	Weeksellaceae	Elizabethkingia	NA	9.37433	8.47123	52.4578	1.65099e-12	2.79168e-11
Proteobacteria	Alphaproteobacteria	Rickettsiales	unclassified	unclassified	NA	5.60881	3.99849	52.1217	1.92795e-12	3.07436e-11
Proteobacteria	Deltaproteobacteria	Myxococcales	Polyangiaceae	Chondromyces	NA	-8.46435	9.94347	52.1213	1.92836e-12	3.07436e-11
Tenericutes	Mollicutes	Anaeroplasmatales	Anaeroplasmataceae	Asteroleplasma	NA	4.75372	2.51475	51.6819	2.36218e-12	3.66138e-11
WS3	PRR-12	LD1-PA13	unclassified	unclassified	NA	-6.38296	5.09027	51.4326	2.65058e-12	3.99736e-11
Proteobacteria	Alphaproteobacteria	Rhodospirillales	Acetobacteraceae	Craurococcus	NA	-6.38203	5.46281	48.655	9.60868e-12	1.41096e-10
Bacteroidetes	Bac22	unclassified	unclassified	unclassified	NA	-5.63189	5.42918	47.4876	1.65481e-11	2.36765e-10
Elusimicrobia	Elusimicrobia	IIb	unclassified	unclassified	NA	-6.23703	5.37591	45.5131	4.1634e-11	5.80794e-10
Acidobacteria	Acidobacteriia	Acidobacteriales	Koribacteraceae	Candidatus Koribacter	NA	7.2005	6.14766	44.7099	6.06693e-11	8.25695e-10
Gemmatimonadetes	Gemmatimonadetes	KD8-87	unclassified	unclassified	NA	6.21294	5.74146	43.93	8.75019e-11	1.16253e-09
Proteobacteria	Betaproteobacteria	Burkholderiales	unclassified	unclassified	NA	5.8822	5.029	43.5101	1.06605e-10	1.38339e-09
Proteobacteria	Deltaproteobacteria	Bdellovibrionales	Bacteriovoracaceae	Peredibacter	NA	-5.28814	4.06599	42.5967	1.63906e-10	2.07862e-09
Armatimonadetes	Chthonomonadetes	Chthonomonadales	Chthonomonadaceae	unclassified	NA	-4.52247	3.1175	42.4442	1.76123e-10	2.18393e-09
Bacteroidetes	Flavobacteriia	Flavobacteriales	Weeksellaceae	unclassified	NA	-10.5733	9.18405	40.7766	3.87293e-10	4.69803e-09
Proteobacteria	Deltaproteobacteria	Myxococcales	Cystobacterineae	unclassified	NA	-4.82565	4.44125	40.5937	4.22343e-10	5.0142e-09
Proteobacteria	Deltaproteobacteria	MIZ46	unclassified	unclassified	NA	7.17042	6.26726	40.3422	4.75788e-10	5.53103e-09
Proteobacteria	Gammaproteobacteria	Alteromonadales	Alteromonadaceae	unclassified	NA	4.96333	4.20082	39.1142	8.52196e-10	9.7046e-09
Verrucomicrobia	unclassified	unclassified	unclassified	unclassified	NA	-7.5575	7.61152	37.2189	2.10247e-09	2.34635e-08
Proteobacteria	Alphaproteobacteria	Rhizobiales	Methylobacteriaceae	Methylobacterium	NA	-8.00974	8.4303	36.9978	2.33669e-09	2.55661e-08
Fibrobacteres	Fibrobacteria	258ds10	unclassified	unclassified	NA	-5.55762	5.61788	36.9374	2.40508e-09	2.58084e-08
Nitrospirae	Nitrospira	Nitrospirales	Nitrospiraceae	JG37-AG-70	NA	-7.91052	7.50526	36.396	3.11578e-09	3.28039e-08
Firmicutes	Bacilli	Lactobacillales	Carnobacteriaceae	Carnobacterium	NA	7.00164	7.50436	36.1476	3.50925e-09	3.62622e-08
Proteobacteria	Alphaproteobacteria	Rhizobiales	Brucellaceae	Ochrobactrum	NA	-9.09098	10.0688	35.6678	4.41615e-09	4.48039e-08
Proteobacteria	Alphaproteobacteria	Rhizobiales	Aurantimonadaceae	unclassified	NA	6.11618	6.22631	35.4002	5.02091e-09	4.95476e-08
Chloroflexi	TK10	WMSP1	FFCH4570	unclassified	NA	5.79829	5.03048	35.3835	5.06132e-09	4.95476e-08
Proteobacteria	Deltaproteobacteria	Myxococcales	Myxococcaceae	Corallococcus	NA	-4.29754	5.64728	34.3432	8.3428e-09	7.85371e-08
Actinobacteria	Actinobacteria	Actinomycetales	Nocardioidaceae	Nocardioides	NA	9.29538	10.5276	34.3254	8.41461e-09	7.85371e-08
Chloroflexi	Anaerolineae	CFB-26	unclassified	unclassified	NA	-6.0234	6.17728	34.318	8.44485e-09	7.85371e-08
NKB19	TSBW08	unclassified	unclassified	unclassified	NA	-6.35375	6.86212	34.0569	9.57526e-09	8.75901e-08
TM7	SC3	unclassified	unclassified	unclassified	NA	-5.065	4.78373	34.0142	9.77419e-09	8.79677e-08
Acidobacteria	BPC102	MVS-40	unclassified	unclassified	NA	-7.97891	8.40541	33.6573	1.16076e-08	1.01416e-07
Proteobacteria	Alphaproteobacteria	Sphingomonadales	Sphingomonadaceae	Sphingosinicella	NA	-4.10586	2.93816	33.653	1.16319e-08	1.01416e-07
Gemmatimonadetes	Gemmatimonadetes	Ellin5290	unclassified	unclassified	NA	-8.44951	8.41553	33.4404	1.28873e-08	1.10633e-07
Proteobacteria	Gammaproteobacteria	Legionellales	Coxiellaceae	Aquicella	NA	5.40885	5.83768	32.4547	2.07415e-08	1.7536e-07
Bacteroidetes	Saprospirae	Saprospirales	Chitinophagaceae	Niabella	NA	8.47488	9.14601	32.1965	2.35004e-08	1.9572e-07
Actinobacteria	Actinobacteria	Actinomycetales	Micromonosporaceae	Actinoplanes	NA	-7.43841	8.28274	30.8576	4.4969e-08	3.6901e-07
Bacteroidetes	Saprospirae	Saprospirales	Chitinophagaceae	Lacibacter	NA	-6.66185	7.33903	30.1199	6.43658e-08	5.20523e-07
Proteobacteria	Alphaproteobacteria	Rhizobiales	Bradyrhizobiaceae	Bosea	NA	7.28518	8.10897	29.9148	7.11201e-08	5.66929e-07
Actinobacteria	Actinobacteria	Actinomycetales	Kineosporiaceae	Kineosporia	NA	-3.22681	1.55409	29.7529	7.69556e-08	6.04806e-07
Actinobacteria	Thermoleophilia	Gaiellales	Gaiellaceae	Gaiella	NA	3.62483	2.29015	29.5133	8.64835e-08	6.70247e-07
Chloroflexi	Anaerolineae	H39	unclassified	unclassified	NA	-3.85797	3.71862	29.3176	9.5143e-08	7.27257e-07
Proteobacteria	Alphaproteobacteria	Rhizobiales	Brucellaceae	unclassified	NA	10.9725	11.4221	29.2454	9.85546e-08	7.43155e-07
Bacteroidetes	Bacteroidia	Bacteroidales	unclassified	unclassified	NA	4.7488	5.19814	28.6983	1.28726e-07	9.57721e-07
Actinobacteria	Actinobacteria	Actinomycetales	Micromonosporaceae	Micromonospora	NA	8.89498	10.5711	28.6551	1.31471e-07	9.65277e-07
Proteobacteria	Alphaproteobacteria	Rhizobiales	Phyllobacteriaceae	Aminobacter	NA	-7.78357	9.14753	27.9746	1.83392e-07	1.329e-06
Chloroflexi	Anaerolineae	unclassified	unclassified	unclassified	NA	5.22967	5.74877	27.8873	1.91401e-07	1.36925e-06
Acidobacteria	Solibacteres	Solibacterales	Solibacteraceae	Candidatus Solibacter	NA	5.74744	7.74783	27.578	2.22727e-07	1.57318e-06
Bacteroidetes	Cytophagia	Cytophagales	Cytophagaceae	Rhodocytophaga	NA	5.12796	5.67016	26.7956	3.26985e-07	2.28072e-06
Proteobacteria	Deltaproteobacteria	PB19	unclassified	unclassified	NA	3.10695	1.63954	26.6683	3.48088e-07	2.38874e-06
Bacteroidetes	Cytophagia	Cytophagales	Cytophagaceae	Pontibacter	NA	-4.28368	5.9462	26.6512	3.51033e-07	2.38874e-06
Actinobacteria	Thermoleophilia	Gaiellales	unclassified	unclassified	NA	-5.23274	5.56619	26.4883	3.80308e-07	2.55677e-06
Chloroflexi	unclassified	unclassified	unclassified	unclassified	NA	-5.3783	7.77366	26.4059	3.96037e-07	2.63082e-06
Verrucomicrobia	Opitutae	Opitutales	Opitutaceae	Opitutus	NA	-5.77662	7.02305	26.0471	4.72528e-07	3.10201e-06
Bacteroidetes	Sphingobacteriia	Sphingobacteriales	Sphingobacteriaceae	Mucilaginibacter	NA	-5.71318	6.78152	25.6049	5.87599e-07	3.81256e-06
Actinobacteria	Actinobacteria	Actinomycetales	Frankiaceae	unclassified	NA	9.04142	12.1297	25.3174	6.77153e-07	4.34312e-06
Actinobacteria	Actinobacteria	Actinomycetales	Microbacteriaceae	Frondihabitans	NA	3.59111	3.09501	25.1123	7.49329e-07	4.75143e-06
Bacteroidetes	Saprospirae	Saprospirales	Chitinophagaceae	Trachelomonas	NA	5.8459	7.96313	24.9759	8.0157e-07	5.02557e-06
Actinobacteria	Actinobacteria	Actinomycetales	Streptomycetaceae	unclassified	NA	9.29658	11.9956	24.9256	8.21722e-07	5.09468e-06
Proteobacteria	Gammaproteobacteria	Legionellales	Legionellaceae	Legionella	NA	-6.81801	7.40123	24.4851	1.0218e-06	6.26553e-06
Proteobacteria	Alphaproteobacteria	Sphingomonadales	Sphingomonadaceae	Novosphingobium	NA	7.45249	9.5589	24.1571	1.20199e-06	7.29031e-06
Actinobacteria	Thermoleophilia	Solirubrobacterales	Conexibacteraceae	unclassified	NA	-5.89205	8.247	23.5362	1.63549e-06	9.81296e-06
Actinobacteria	Thermoleophilia	Gaiellales	02E	unclassified	NA	4.33621	5.50952	23.4796	1.68214e-06	9.98548e-06
Firmicutes	Bacilli	Lactobacillales	Streptococcaceae	Lactococcus	NA	-4.9569	8.21566	23.3855	1.76258e-06	1.03529e-05
Chlorobi	unclassified	unclassified	unclassified	unclassified	NA	3.78397	4.87006	23.0974	2.03398e-06	1.17352e-05
Cyanobacteria	ML635J-21	unclassified	unclassified	unclassified	NA	7.94405	11.2362	23.0915	2.04e-06	1.17352e-05
Bacteroidetes	Cytophagia	Cytophagales	Cytophagaceae	Hymenobacter	NA	-6.91408	8.43609	22.914	2.22829e-06	1.26876e-05
Chloroflexi	TK10	AKYG885	23	unclassified	NA	3.98807	5.81413	22.7188	2.45559e-06	1.38406e-05
Chloroflexi	Anaerolineae	SBR1031	SJA-101	unclassified	NA	5.18856	7.42651	21.9854	3.53968e-06	1.97514e-05
Proteobacteria	Deltaproteobacteria	Myxococcales	Nannocystaceae	Nannocystis	NA	7.58111	9.98392	21.3054	4.97255e-06	2.74721e-05
Proteobacteria	Deltaproteobacteria	Bdellovibrionales	Bacteriovoracaceae	unclassified	NA	5.55806	8.06363	21.1177	5.46269e-06	2.98841e-05
Proteobacteria	Deltaproteobacteria	Myxococcales	OM27	unclassified	NA	6.11791	8.43689	20.8237	6.32976e-06	3.42913e-05
Chloroflexi	Anaerolineae	SBR1031	oc28	unclassified	NA	-3.16502	3.35181	20.7304	6.63296e-06	3.55884e-05
Proteobacteria	Gammaproteobacteria	Xanthomonadales	Xanthomonadaceae	Rhodanobacter	NA	-7.57367	10.3489	20.5619	7.2179e-06	3.8358e-05
Verrucomicrobia	Methylacidiphilae	Methylacidiphilales	LD19	unclassified	NA	4.26178	6.69323	19.7142	1.10534e-05	5.81869e-05
Bacteroidetes	Flavobacteriia	Flavobacteriales	Cryomorphaceae	unclassified	NA	4.37338	5.5055	19.6525	1.1402e-05	5.94609e-05
Actinobacteria	Actinobacteria	Actinomycetales	Nocardiaceae	Nocardia	NA	-5.31414	8.77705	19.5859	1.17911e-05	6.09208e-05
OD1	unclassified	unclassified	unclassified	unclassified	NA	-5.25723	8.92277	19.1091	1.49959e-05	7.6768e-05
Proteobacteria	Betaproteobacteria	Burkholderiales	Comamonadaceae	Roseateles	NA	2.55467	1.44703	18.6638	1.87793e-05	9.52624e-05
Bacteroidetes	Flavobacteriia	Flavobacteriales	Flavobacteriaceae	unclassified	NA	-5.80536	9.06032	18.1974	2.37806e-05	0.000119546
Proteobacteria	Betaproteobacteria	Burkholderiales	Burkholderiaceae	Burkholderia	NA	3.88191	8.27736	17.2965	3.75727e-05	0.000187192
Bacteroidetes	Saprospirae	Saprospirales	unclassified	unclassified	NA	3.5361	5.24351	16.6437	5.24006e-05	0.000258757
Actinobacteria	Actinobacteria	Actinomycetales	Glycomycetaceae	Glycomyces	NA	-3.70277	4.95852	15.5255	9.28576e-05	0.000454514
WS3	PRR-12	Sediment-1	PRR-10	unclassified	NA	5.13192	9.20182	15.4329	9.73767e-05	0.000472489
Proteobacteria	Gammaproteobacteria	Legionellales	Coxiellaceae	unclassified	NA	3.99855	6.24914	14.6641	0.000144619	0.000695668
Proteobacteria	Betaproteobacteria	Nitrosomonadales	Nitrosomonadaceae	Nitrosospira	NA	2.7774	4.50035	14.5309	0.000154895	0.000738732
Actinobacteria	Actinobacteria	Actinomycetales	Propionibacteriaceae	Propionibacterium	NA	2.94774	4.97364	14.3498	0.000170079	0.00080427
Proteobacteria	Gammaproteobacteria	Xanthomonadales	Xanthomonadaceae	Dokdonella	NA	-4.50662	9.10533	11.7775	0.000648694	0.00304178

## Sheet: NAM-17
Phylum	Class	Order	Family	Genus	Species	logFC	logCPM	F	PValue	FDR
Proteobacteria	Gammaproteobacteria	Enterobacteriales	Enterobacteriaceae	Citrobacter	NA	8.66454	5.89838	104.4	2.09775e-22	1.17055e-19
Firmicutes	Clostridia	Clostridiales	Veillonellaceae	Pelosinus	NA	8.36095	5.60442	100.352	1.14711e-21	3.20044e-19
Proteobacteria	Alphaproteobacteria	Rhodospirillales	Rhodospirillaceae	Dongia	NA	-8.25441	5.40914	97.7662	3.41709e-21	6.35579e-19
Proteobacteria	Alphaproteobacteria	Sphingomonadales	Sphingomonadaceae	Sphingobium	NA	-7.7326	4.8835	94.5939	1.31282e-20	1.83139e-18
Proteobacteria	Betaproteobacteria	Burkholderiales	Oxalobacteraceae	Herminiimonas	NA	9.08772	6.57235	90.3969	7.88238e-20	8.08858e-18
Actinobacteria	Actinobacteria	Actinomycetales	Streptosporangiaceae	unclassified	NA	9.6166	6.93362	90.1675	8.69739e-20	8.08858e-18
Actinobacteria	Actinobacteria	Actinomycetales	Streptosporangiaceae	Nonomuraea	NA	-8.06051	5.4832	89.1504	1.34584e-19	1.07283e-17
Bacteroidetes	Cytophagia	Cytophagales	Cytophagaceae	Emticicia	NA	6.93254	4.26465	83.5819	1.49037e-18	1.03953e-16
WPS-2	unclassified	unclassified	unclassified	unclassified	NA	7.5797	5.05995	80.0997	6.78841e-18	4.20882e-16
Proteobacteria	Gammaproteobacteria	Enterobacteriales	Enterobacteriaceae	Enterobacter	NA	15.0152	12.8884	78.6804	1.26293e-17	7.04716e-16
Firmicutes	Bacilli	Bacillales	Thermoactinomycetaceae	unclassified	NA	-5.77495	3.13557	72.5572	1.874e-16	9.50631e-15
Actinobacteria	Actinobacteria	Actinomycetales	Actinosynnemataceae	Kibdelosporangium	NA	-7.24137	6.74856	69.2269	8.23398e-16	3.8288e-14
Proteobacteria	Alphaproteobacteria	Rhodobacterales	Rhodobacteraceae	unclassified	NA	-8.29315	5.8974	66.3974	2.9179e-15	1.25245e-13
Proteobacteria	Betaproteobacteria	A21b	UD5	unclassified	NA	6.29536	4.03321	65.1396	5.13193e-15	2.04544e-13
Chloroflexi	TK10	AKYG885	5B-12	unclassified	NA	-5.13979	2.66365	64.2619	7.61675e-15	2.69126e-13
Actinobacteria	Actinobacteria	Actinomycetales	Williamsiaceae	Williamsia	NA	-6.21173	4.81226	64.2329	7.71688e-15	2.69126e-13
Proteobacteria	Betaproteobacteria	Burkholderiales	Comamonadaceae	Ramlibacter	NA	-7.78346	7.86239	61.4345	2.73023e-14	8.96158e-13
Proteobacteria	Gammaproteobacteria	Vibrionales	Vibrionaceae	Listonella	NA	-8.33421	6.20189	57.9584	1.32486e-13	4.10706e-12
Actinobacteria	Actinobacteria	Actinomycetales	Micromonosporaceae	Pilimelia	NA	-9.02263	7.49493	57.563	1.58673e-13	4.65997e-12
Proteobacteria	Betaproteobacteria	Burkholderiales	Oxalobacteraceae	Duganella	NA	6.81348	4.99511	56.3483	2.7642e-13	7.71211e-12
Verrucomicrobia	Pedosphaerae	Pedosphaerales	Ellin515	unclassified	NA	5.59742	3.89	53.7927	8.9273e-13	2.37211e-11
Proteobacteria	Gammaproteobacteria	Pseudomonadales	Moraxellaceae	Perlucidibaca	NA	-5.35567	3.73967	53.6086	9.71617e-13	2.46437e-11
Armatimonadetes	Fimbriimonadia	Fimbriimonadales	unclassified	unclassified	NA	6.9274	6.31779	51.902	2.13381e-12	5.17682e-11
Firmicutes	Bacilli	Lactobacillales	Carnobacteriaceae	Carnobacterium	NA	9.09242	7.50436	51.4448	2.63575e-12	6.12812e-11
Proteobacteria	Deltaproteobacteria	Myxococcales	Polyangiaceae	Chondromyces	NA	-8.33826	9.94347	51.1108	3.07593e-12	6.86547e-11
MVP-21	unclassified	unclassified	unclassified	unclassified	NA	-5.65264	4.4149	50.9882	3.25542e-12	6.98662e-11
WS3	PRR-12	LD1-PA13	unclassified	unclassified	NA	-6.23479	5.09027	49.9219	5.33497e-12	1.10256e-10
Acidobacteria	Solibacteres	Solibacterales	Solibacteraceae	Candidatus Solibacter	NA	8.65134	7.74783	48.919	8.49902e-12	1.69373e-10
Proteobacteria	Betaproteobacteria	Burkholderiales	Comamonadaceae	Hylemonella	NA	6.90031	6.82617	48.4301	1.06685e-11	2.05276e-10
Gemmatimonadetes	unclassified	unclassified	unclassified	unclassified	NA	-8.151	7.04275	47.3485	1.76574e-11	3.28427e-10
Proteobacteria	Alphaproteobacteria	Rhodospirillales	Acetobacteraceae	Craurococcus	NA	-6.23562	5.46281	47.2366	1.86032e-11	3.34858e-10
Verrucomicrobia	Methylacidiphilae	Methylacidiphilales	unclassified	unclassified	NA	4.42851	2.30138	46.8667	2.21091e-11	3.85527e-10
Proteobacteria	Alphaproteobacteria	Sphingomonadales	unclassified	unclassified	NA	-9.24148	12.173	46.3336	2.83615e-11	4.79567e-10
Acidobacteria	AT-s54	unclassified	unclassified	unclassified	NA	5.52955	4.45535	46.1856	3.03942e-11	4.98823e-10
Bacteroidetes	Bac22	unclassified	unclassified	unclassified	NA	-5.48533	5.42918	45.846	3.56263e-11	5.67986e-10
Actinobacteria	Actinobacteria	Actinomycetales	Pseudonocardiaceae	Amycolatopsis	NA	-8.50172	8.6156	44.5309	6.5986e-11	1.02278e-09
Proteobacteria	Alphaproteobacteria	Rhizobiales	Aurantimonadaceae	Aurantimonas	NA	4.54356	2.56654	44.1666	7.82955e-11	1.16311e-09
Elusimicrobia	Elusimicrobia	IIb	unclassified	unclassified	NA	-6.09022	5.37591	44.1419	7.9208e-11	1.16311e-09
Proteobacteria	Deltaproteobacteria	MIZ46	unclassified	unclassified	NA	7.63085	6.26726	44.0378	8.31816e-11	1.19014e-09
Chloroflexi	Chloroflexi	Chloroflexales	unclassified	unclassified	NA	5.84866	5.09899	43.8056	9.27718e-11	1.29417e-09
Planctomycetes	Phycisphaerae	CPla-3	unclassified	unclassified	NA	8.24671	6.69394	42.204	1.9726e-10	2.68466e-09
Proteobacteria	Alphaproteobacteria	Rhizobiales	Phyllobacteriaceae	unclassified	NA	7.82516	7.81853	42.1207	2.05165e-10	2.72576e-09
Bacteroidetes	Flavobacteriia	Flavobacteriales	unclassified	unclassified	NA	4.12027	2.11853	42.0283	2.1431e-10	2.78105e-09
Actinobacteria	Actinobacteria	Actinomycetales	Cryptosporangiaceae	unclassified	NA	-8.35833	8.65653	41.2	3.16972e-10	4.01979e-09
Proteobacteria	Deltaproteobacteria	Bdellovibrionales	Bacteriovoracaceae	Peredibacter	NA	-5.13416	4.06599	40.9378	3.58847e-10	4.44971e-09
Proteobacteria	Deltaproteobacteria	Myxococcales	Cystobacterineae	unclassified	NA	-4.84177	4.44125	40.5277	4.3575e-10	5.28583e-09
Armatimonadetes	Chthonomonadetes	Chthonomonadales	Chthonomonadaceae	unclassified	NA	-4.36234	3.1175	40.3434	4.75507e-10	5.64539e-09
Bacteroidetes	Flavobacteriia	Flavobacteriales	Weeksellaceae	unclassified	NA	-10.4011	9.18405	39.9731	5.66774e-10	6.58875e-09
Firmicutes	Bacilli	Bacillales	unclassified	unclassified	NA	-6.4932	5.39191	37.4414	1.89053e-09	2.15289e-08
Bacteroidetes	Saprospirae	Saprospirales	Chitinophagaceae	Chitinophaga	NA	-9.84272	9.15172	36.5143	2.94438e-09	3.28593e-08
Chloroflexi	SAR202	unclassified	unclassified	unclassified	NA	-6.36195	6.52427	36.0833	3.61892e-09	3.95086e-08
Actinobacteria	Actinobacteria	Actinomycetales	Geodermatophilaceae	Blastococcus	NA	-7.17612	7.11571	36.0474	3.6818e-09	3.95086e-08
Proteobacteria	Alphaproteobacteria	Rhizobiales	Brucellaceae	Ochrobactrum	NA	-9.14182	10.0688	35.8148	4.11578e-09	4.33322e-08
Fibrobacteres	Fibrobacteria	258ds10	unclassified	unclassified	NA	-5.41211	5.61788	35.6436	4.46778e-09	4.6167e-08
Proteobacteria	Alphaproteobacteria	Rhizobiales	Rhizobiaceae	Kaistia	NA	7.59824	7.45686	35.4735	4.84744e-09	4.91795e-08
Bacteroidetes	Saprospirae	Saprospirales	Chitinophagaceae	Trachelomonas	NA	7.4189	7.96313	35.0241	6.01437e-09	5.99289e-08
Actinobacteria	Actinobacteria	Actinomycetales	Microbacteriaceae	Mycetocola	NA	-6.16379	7.73208	34.7956	6.71222e-09	6.57091e-08
Verrucomicrobia	Pedosphaerae	Pedosphaerales	unclassified	unclassified	NA	-9.32556	9.56602	34.6164	7.31572e-09	7.03823e-08
Verrucomicrobia	Pedosphaerae	Pedosphaerales	R4-41B	unclassified	NA	5.94529	6.64713	34.3933	8.14425e-09	7.61056e-08
TM6	SJA-4	unclassified	unclassified	unclassified	NA	4.11315	3.41259	34.3833	8.18339e-09	7.61056e-08
WS3	PRR-12	Sediment-1	PRR-10	unclassified	NA	8.88865	9.20182	33.5903	1.19886e-08	1.09666e-07
Chloroflexi	Anaerolineae	CFB-26	unclassified	unclassified	NA	-5.88218	6.17728	33.2614	1.40495e-08	1.26445e-07
Proteobacteria	Alphaproteobacteria	Rhizobiales	Xanthobacteraceae	Labrys	NA	-9.46288	10.4062	33.1466	1.48492e-08	1.31521e-07
NKB19	unclassified	unclassified	unclassified	unclassified	NA	4.74563	3.82191	33.0034	1.59123e-08	1.38735e-07
Gemmatimonadetes	Gemm-2	unclassified	unclassified	unclassified	NA	-7.27884	7.37876	32.9091	1.66536e-08	1.42965e-07
Proteobacteria	Alphaproteobacteria	Sphingomonadales	Sphingomonadaceae	Novosphingobium	NA	9.40081	9.5589	32.842	1.72018e-08	1.45433e-07
Proteobacteria	Gammaproteobacteria	Xanthomonadales	Xanthomonadaceae	Luteimonas	NA	-10.0066	10.9018	32.6974	1.84463e-08	1.53627e-07
Proteobacteria	Deltaproteobacteria	Myxococcales	Myxococcaceae	Corallococcus	NA	-4.15229	5.64728	32.6462	1.89085e-08	1.53639e-07
TM7	SC3	unclassified	unclassified	unclassified	NA	-4.91526	4.78373	32.6364	1.89983e-08	1.53639e-07
Actinobacteria	Actinobacteria	Actinomycetales	Micromonosporaceae	Micromonospora	NA	9.81196	10.5711	32.5088	2.02061e-08	1.61072e-07
Bacteroidetes	Flavobacteriia	Flavobacteriales	Cryomorphaceae	Fluviicola	NA	-9.2882	9.10897	32.2465	2.29393e-08	1.78046e-07
Acidobacteria	Acidobacteriia	Acidobacteriales	Koribacteraceae	Candidatus Koribacter	NA	5.74513	6.14766	32.2434	2.29737e-08	1.78046e-07
Proteobacteria	Alphaproteobacteria	Sphingomonadales	Sphingomonadaceae	Sphingosinicella	NA	-3.94537	2.93816	31.7539	2.91157e-08	2.22556e-07
TM7	unclassified	unclassified	unclassified	unclassified	NA	-8.22864	8.52359	31.3301	3.57548e-08	2.69611e-07
Actinobacteria	Actinobacteria	Actinomycetales	Micromonosporaceae	Actinoplanes	NA	-7.30722	8.28274	30.1486	6.34717e-08	4.7223e-07
Proteobacteria	Deltaproteobacteria	Myxococcales	Myxococcaceae	Myxococcus	NA	6.36701	7.31664	30.0892	6.53343e-08	4.79691e-07
Cyanobacteria	ML635J-21	unclassified	unclassified	unclassified	NA	9.54056	11.2362	29.3268	9.47199e-08	6.86412e-07
Kazan-3B-28	unclassified	unclassified	unclassified	unclassified	NA	3.52219	2.30889	28.9493	1.13878e-07	8.14662e-07
Proteobacteria	Alphaproteobacteria	Rhizobiales	Hyphomicrobiaceae	Rhodobium	NA	-8.10017	8.89459	28.901	1.16591e-07	8.23324e-07
Actinobacteria	Actinobacteria	Actinomycetales	Nocardioidaceae	Aeromicrobium	NA	-10.3135	11.6654	28.8757	1.18039e-07	8.23324e-07
Proteobacteria	Betaproteobacteria	MND1	unclassified	unclassified	NA	-9.49267	11.3623	28.4233	1.47244e-07	1.01435e-06
Proteobacteria	Alphaproteobacteria	Rhodobacterales	Rhodobacteraceae	Rhodobacter	NA	-8.26799	9.27281	28.3752	1.50749e-07	1.02583e-06
Verrucomicrobia	Pedosphaerae	Pedosphaerales	Ellin517	unclassified	NA	-8.84322	10.1458	28.3136	1.55361e-07	1.04448e-06
Chloroflexi	S085	unclassified	unclassified	unclassified	NA	-6.84476	7.66774	28.2518	1.60129e-07	1.06372e-06
Chloroflexi	Anaerolineae	Ardenscatenales	Ardenscatenaceae	Ardenscatena	NA	-6.21492	7.36834	28.0197	1.79389e-07	1.17763e-06
Chloroflexi	Anaerolineae	H39	unclassified	unclassified	NA	-3.70158	3.71862	27.5554	2.25207e-07	1.46122e-06
Actinobacteria	Actinobacteria	Actinomycetales	Kineosporiaceae	Kineosporia	NA	-3.06326	1.55409	27.4245	2.4013e-07	1.54014e-06
Chloroflexi	TK10	WMSP1	FFCH4570	unclassified	NA	4.86573	5.03048	26.9699	3.00154e-07	1.90325e-06
Proteobacteria	Alphaproteobacteria	BD7-3	unclassified	unclassified	NA	-6.26367	6.78253	26.3536	4.06355e-07	2.54771e-06
Proteobacteria	Alphaproteobacteria	Rhizobiales	Phyllobacteriaceae	Aminobacter	NA	-7.33665	9.14753	26.0049	4.8246e-07	2.99125e-06
Actinobacteria	Thermoleophilia	Gaiellales	unclassified	unclassified	NA	-5.08679	5.56619	25.4795	6.25086e-07	3.83295e-06
Proteobacteria	Alphaproteobacteria	Caulobacterales	Caulobacteraceae	Brevundimonas	NA	-9.15281	11.1857	25.3948	6.51776e-07	3.95317e-06
Bacteroidetes	Cytophagia	Cytophagales	Cytophagaceae	Pontibacter	NA	-4.14083	5.9462	25.3443	6.68208e-07	4.00925e-06
Chloroflexi	unclassified	unclassified	unclassified	unclassified	NA	-5.21361	7.77366	25.293	6.8536e-07	4.04405e-06
Actinobacteria	Actinobacteria	Actinomycetales	Microbacteriaceae	Leifsonia	NA	2.99638	1.59021	25.2837	6.88504e-07	4.04405e-06
Acidobacteria	Acidobacteria-5	unclassified	unclassified	unclassified	NA	-7.86471	9.35696	25.015	7.86232e-07	4.56998e-06
Actinobacteria	Thermoleophilia	Solirubrobacterales	Conexibacteraceae	unclassified	NA	-6.14632	8.247	24.7465	8.97813e-07	5.16474e-06
Proteobacteria	Deltaproteobacteria	Myxococcales	Nannocystaceae	Nannocystis	NA	8.27593	9.98392	23.9469	1.33399e-06	7.5956e-06
Proteobacteria	Gammaproteobacteria	Legionellales	Legionellaceae	Legionella	NA	-6.68324	7.40123	23.8397	1.40682e-06	7.92934e-06
Actinobacteria	Actinobacteria	Actinomycetales	Cellulomonadaceae	Cellulomonas	NA	7.44418	10.2266	23.1932	1.93938e-06	1.08217e-05
Chloroflexi	Anaerolineae	A31	S47	unclassified	NA	-6.93747	8.91294	22.5453	2.67734e-06	1.47916e-05
Proteobacteria	Deltaproteobacteria	Bdellovibrionales	Bacteriovoracaceae	unclassified	NA	5.62922	8.06363	21.5262	4.45255e-06	2.43581e-05
Proteobacteria	Alphaproteobacteria	Rhizobiales	Brucellaceae	unclassified	NA	8.38448	11.4221	20.7457	6.58206e-06	3.56581e-05
Proteobacteria	Betaproteobacteria	Nitrosomonadales	Nitrosomonadaceae	Nitrosospira	NA	-3.42993	4.50035	19.6629	1.13424e-05	6.08561e-05
Chloroflexi	Anaerolineae	SBR1031	oc28	unclassified	NA	-3.06004	3.35181	19.5806	1.18224e-05	6.28274e-05
Actinobacteria	Actinobacteria	Actinomycetales	Nocardiaceae	Nocardia	NA	-5.29028	8.77705	19.4179	1.28328e-05	6.7554e-05
Proteobacteria	Deltaproteobacteria	Entotheonellales	Entotheonellaceae	Candidatus Entotheonella	NA	-6.02547	8.73082	19.1597	1.4618e-05	7.62322e-05
Firmicutes	Bacilli	Lactobacillales	Streptococcaceae	Lactococcus	NA	4.32168	8.21566	18.8055	1.74817e-05	9.03224e-05
Proteobacteria	Betaproteobacteria	Burkholderiales	Oxalobacteraceae	Massilia	NA	7.98114	12.2108	18.46	2.08193e-05	0.000106432
OD1	unclassified	unclassified	unclassified	unclassified	NA	-5.1283	8.92277	18.4447	2.09812e-05	0.000106432
Bacteroidetes	Flavobacteriia	Flavobacteriales	Flavobacteriaceae	unclassified	NA	-5.67686	9.06032	17.6251	3.17932e-05	0.000159825
Proteobacteria	Alphaproteobacteria	Caulobacterales	Caulobacteraceae	Asticcacaulis	NA	3.79189	5.78991	17.283	3.78316e-05	0.000188483
Chloroflexi	Anaerolineae	unclassified	unclassified	unclassified	NA	3.79565	5.74877	16.5036	5.62846e-05	0.000277936
Thermi	Deinococci	Deinococcales	Trueperaceae	unclassified	NA	-3.42601	5.49944	16.3607	6.05476e-05	0.000296365
Chloroflexi	Anaerolineae	SBR1031	SJA-101	unclassified	NA	4.19387	7.42651	15.6705	8.62044e-05	0.000418279
Actinobacteria	Actinobacteria	Actinomycetales	Streptomycetaceae	unclassified	NA	6.459	11.9956	15.2382	0.000107621	0.000517696
Actinobacteria	Actinobacteria	Actinomycetales	Glycomycetaceae	Glycomyces	NA	-3.57281	4.95852	14.6814	0.000143332	0.000683583
WS2	SHA-109	unclassified	unclassified	unclassified	NA	-4.57162	7.4353	14.4748	0.000159445	0.000753984
Proteobacteria	Betaproteobacteria	Burkholderiales	Comamonadaceae	Pelomonas	NA	3.18332	6.90209	13.5884	0.000252218	0.00118267
Proteobacteria	Gammaproteobacteria	Xanthomonadales	Xanthomonadaceae	Dokdonella	NA	4.84566	9.10533	13.0545	0.000332825	0.00154763
Actinobacteria	Actinobacteria	Actinomycetales	Intrasporangiaceae	unclassified	NA	-4.73411	9.43569	12.2654	0.000502358	0.00231666
Elusimicrobia	Endomicrobia	unclassified	unclassified	unclassified	NA	1.97811	1.28575	11.67	0.000686359	0.00313925
Bacteroidetes	Saprospirae	Saprospirales	unclassified	unclassified	NA	2.83201	5.24351	11.3897	0.000795346	0.00360815
Proteobacteria	Gammaproteobacteria	Legionellales	unclassified	unclassified	NA	-2.64888	5.30116	10.3527	0.00137581	0.00619116
Gemmatimonadetes	Gemm-5	unclassified	unclassified	unclassified	NA	-4.20752	12.0574	9.99616	0.00166291	0.00742323
Actinobacteria	Actinobacteria	Actinomycetales	Geodermatophilaceae	Geodermatophilus	NA	4.42704	10.1088	9.6014	0.00205259	0.00909003

## Sheet: NAM-23
Phylum	Class	Order	Family	Genus	Species	logFC	logCPM	F	PValue	FDR
Proteobacteria	Alphaproteobacteria	Rhodospirillales	Rhodospirillaceae	Dongia	NA	-8.40122	5.40914	100.012	1.32365e-21	7.38598e-19
Proteobacteria	Alphaproteobacteria	Sphingomonadales	Sphingomonadaceae	Sphingobium	NA	-7.84943	4.8835	96.3484	6.23015e-21	1.73821e-18
Actinobacteria	Actinobacteria	Actinomycetales	Streptosporangiaceae	Nonomuraea	NA	-8.20698	5.4832	91.0458	5.96934e-20	1.1103e-17
Actinobacteria	Actinobacteria	Actinomycetales	Promicromonosporaceae	Cellulosimicrobium	NA	9.99557	7.72194	80.2407	6.38283e-18	8.90405e-16
Bacteroidetes	Saprospirae	Saprospirales	Chitinophagaceae	Sediminibacterium	NA	6.4141	3.80632	76.3083	3.57736e-17	3.75372e-15
Proteobacteria	Betaproteobacteria	Burkholderiales	Comamonadaceae	Rubrivivax	NA	8.17131	6.32871	76.034	4.03626e-17	3.75372e-15
Firmicutes	Bacilli	Bacillales	Thermoactinomycetaceae	unclassified	NA	-5.93522	3.13557	75.1239	6.027e-17	4.80438e-15
Nitrospirae	Nitrospira	Nitrospirales	Nitrospiraceae	unclassified	NA	6.10951	3.54627	72.0818	2.31359e-16	1.61373e-14
Proteobacteria	Gammaproteobacteria	Legionellales	Legionellaceae	unclassified	NA	6.37296	3.89405	71.2539	3.3408e-16	2.0713e-14
Actinobacteria	Actinobacteria	Actinomycetales	Actinosynnemataceae	Kibdelosporangium	NA	-7.37933	6.74856	70.8637	3.97324e-16	2.21707e-14
Acidobacteria	Solibacteres	Solibacterales	PAUC26f	unclassified	NA	5.74628	3.24783	66.853	2.37893e-15	1.20677e-13
Actinobacteria	Actinobacteria	Actinomycetales	Williamsiaceae	Williamsia	NA	-6.30665	4.81226	65.5871	4.19738e-15	1.84928e-13
Chloroflexi	TK10	AKYG885	5B-12	unclassified	NA	-5.19927	2.66365	65.529	4.30837e-15	1.84928e-13
Chloroflexi	TK17	unclassified	unclassified	unclassified	NA	6.22279	4.08012	64.9317	5.63479e-15	2.24587e-13
Proteobacteria	Betaproteobacteria	Burkholderiales	Comamonadaceae	Ramlibacter	NA	-7.91655	7.86239	62.8311	1.45193e-14	5.38466e-13
Proteobacteria	Betaproteobacteria	Burkholderiales	Alcaligenaceae	Bordetella	NA	7.31003	5.61795	62.695	1.54399e-14	5.38466e-13
Proteobacteria	Deltaproteobacteria	FAC87	unclassified	unclassified	NA	6.41326	4.11948	62.0243	2.09064e-14	6.8622e-13
Proteobacteria	Gammaproteobacteria	Vibrionales	Vibrionaceae	Listonella	NA	-8.4754	6.20189	59.2286	7.42931e-14	2.30309e-12
Actinobacteria	Actinobacteria	Actinomycetales	Micromonosporaceae	Pilimelia	NA	-9.02416	7.49493	57.7991	1.4247e-13	4.18412e-12
Proteobacteria	Alphaproteobacteria	Caulobacterales	Caulobacteraceae	Arthrospira	NA	6.69692	5.0766	56.8387	2.20888e-13	6.16278e-12
Proteobacteria	Gammaproteobacteria	Pseudomonadales	Moraxellaceae	Perlucidibaca	NA	-5.51207	3.73967	55.6799	3.75372e-13	9.97417e-12
Firmicutes	Bacilli	Lactobacillales	Streptococcaceae	Streptococcus	NA	7.0263	5.97567	55.3856	4.29585e-13	1.08958e-11
Actinobacteria	Actinobacteria	Actinomycetales	Microbacteriaceae	Clavibacter	NA	8.29865	7.91012	51.7885	2.24867e-12	5.45546e-11
WS3	PRR-12	LD1-PA13	unclassified	unclassified	NA	-6.38312	5.09027	51.434	2.64891e-12	6.15872e-11
Proteobacteria	Betaproteobacteria	Gallionellales	Gallionellaceae	unclassified	NA	7.66234	6.01724	49.988	5.17387e-12	1.15481e-10
Proteobacteria	Gammaproteobacteria	Enterobacteriales	Enterobacteriaceae	Enterobacter	NA	10.2562	12.8884	49.7755	5.70999e-12	1.22545e-10
Proteobacteria	Alphaproteobacteria	Rhodospirillales	Acetobacteraceae	Craurococcus	NA	-6.38218	5.46281	48.6563	9.603e-12	1.98462e-10
Gemmatimonadetes	unclassified	unclassified	unclassified	unclassified	NA	-8.26985	7.04275	48.2766	1.14587e-11	2.28355e-10
Verrucomicrobia	Verrucomicrobiae	Verrucomicrobiales	Verrucomicrobiaceae	Luteolibacter	NA	7.52264	6.05272	48.0689	1.26218e-11	2.42862e-10
Proteobacteria	Alphaproteobacteria	Rickettsiales	Rickettsiaceae	unclassified	NA	6.97018	5.82832	47.7673	1.45254e-11	2.70173e-10
Bacteroidetes	Bac22	unclassified	unclassified	unclassified	NA	-5.63204	5.42918	47.4891	1.65367e-11	2.97661e-10
Proteobacteria	Alphaproteobacteria	Sphingomonadales	unclassified	unclassified	NA	-9.13175	12.173	45.7742	3.68435e-11	6.42459e-10
Proteobacteria	Alphaproteobacteria	Rhizobiales	Phyllobacteriaceae	unclassified	NA	8.29882	7.81853	45.5799	4.03524e-11	6.82322e-10
Actinobacteria	Actinobacteria	Actinomycetales	Pseudonocardiaceae	Amycolatopsis	NA	-8.6318	8.6156	45.4748	4.23879e-11	6.9566e-10
Bacteroidetes	Cytophagia	Cytophagales	Cytophagaceae	Rhodocytophaga	NA	7.28787	5.67016	45.1923	4.83874e-11	7.71434e-10
Verrucomicrobia	Pedosphaerae	Pedosphaerales	R4-41B	unclassified	NA	7.15119	6.64713	44.7824	5.86411e-11	9.08937e-10
Proteobacteria	Betaproteobacteria	Burkholderiales	Comamonadaceae	Pseudorhodoferax	NA	8.58802	9.35225	44.0941	8.10086e-11	1.22094e-09
Proteobacteria	Gammaproteobacteria	Pseudomonadales	Moraxellaceae	unclassified	NA	6.97133	5.4335	44.0387	8.31463e-11	1.22094e-09
Chloroflexi	TK10	AKYG885	unclassified	unclassified	NA	8.28227	7.34665	43.5084	1.06686e-10	1.52643e-09
Proteobacteria	Betaproteobacteria	Burkholderiales	Comamonadaceae	Leptothrix	NA	6.30983	5.84748	43.3814	1.1326e-10	1.57998e-09
Proteobacteria	Deltaproteobacteria	Bdellovibrionales	Bacteriovoracaceae	Peredibacter	NA	-5.27464	4.06599	42.4748	1.73604e-10	2.33769e-09
Armatimonadetes	Chthonomonadetes	Chthonomonadales	Chthonomonadaceae	unclassified	NA	-4.52265	3.1175	42.4462	1.75955e-10	2.33769e-09
Actinobacteria	Actinobacteria	Actinomycetales	Cryptosporangiaceae	unclassified	NA	-8.43115	8.65653	41.7525	2.44118e-10	3.16786e-09
Proteobacteria	Deltaproteobacteria	NB1-j	NB1-i	unclassified	NA	5.27366	4.35998	41.4625	2.79975e-10	3.5506e-09
Proteobacteria	Gammaproteobacteria	Chromatiales	unclassified	unclassified	NA	5.74955	4.50834	40.8413	3.75606e-10	4.65751e-09
Planctomycetes	OM190	CL500-15	unclassified	unclassified	NA	3.99279	2.05262	39.806	6.13562e-10	7.28442e-09
Bacteroidetes	Cytophagia	Cytophagales	Flammeovirgaceae	unclassified	NA	3.99279	2.05262	39.806	6.13562e-10	7.28442e-09
Proteobacteria	Gammaproteobacteria	Legionellales	unclassified	unclassified	NA	-6.21849	5.30116	39.5891	6.80099e-10	7.90615e-09
Proteobacteria	Deltaproteobacteria	Myxococcales	Cystobacterineae	unclassified	NA	-4.71436	4.44125	39.4201	7.36922e-10	8.39188e-09
Verrucomicrobia	Methylacidiphilae	Methylacidiphilales	LD19	unclassified	NA	6.42	6.69323	37.2175	2.10381e-09	2.34785e-08
Chloroflexi	SAR202	unclassified	unclassified	unclassified	NA	-6.48606	6.52427	37.0076	2.32576e-09	2.54466e-08
Proteobacteria	Alphaproteobacteria	Rhizobiales	Brucellaceae	Ochrobactrum	NA	-9.26773	10.0688	36.479	2.9945e-09	3.21333e-08
Proteobacteria	Gammaproteobacteria	Alteromonadales	Alteromonadaceae	unclassified	NA	4.71849	4.20082	36.0402	3.69447e-09	3.81981e-08
Bacteroidetes	Saprospirae	Saprospirales	Chitinophagaceae	Niastella	NA	-7.00334	7.09393	36.039	3.69659e-09	3.81981e-08
Actinobacteria	Actinobacteria	Actinomycetales	Microbacteriaceae	Mycetocola	NA	-6.29738	7.73208	35.7967	4.15165e-09	4.21204e-08
Proteobacteria	Alphaproteobacteria	Rhizobiales	Bradyrhizobiaceae	Blastobacter	NA	5.52232	5.00144	35.1613	5.63091e-09	5.52342e-08
Proteobacteria	Gammaproteobacteria	Chromatiales	Chromatiaceae	unclassified	NA	4.18252	3.24481	35.1571	5.6422e-09	5.52342e-08
Fibrobacteres	Fibrobacteria	258ds10	unclassified	unclassified	NA	-5.31695	5.61788	35.0309	5.99464e-09	5.76726e-08
Proteobacteria	Deltaproteobacteria	Myxococcales	Myxococcaceae	Corallococcus	NA	-4.29769	5.64728	34.3448	8.33663e-09	7.88447e-08
Proteobacteria	Alphaproteobacteria	Rhizobiales	Methylobacteriaceae	Methylobacterium	NA	-7.50082	8.4303	34.2056	8.91398e-09	8.29e-08
Chloroflexi	Anaerolineae	CFB-26	unclassified	unclassified	NA	-5.9897	6.17728	34.0978	9.38856e-09	8.58822e-08
TM7	SC3	unclassified	unclassified	unclassified	NA	-5.06516	4.78373	34.0155	9.76825e-09	8.79143e-08
Proteobacteria	Alphaproteobacteria	Caulobacterales	Caulobacteraceae	Asticcacaulis	NA	5.7411	5.78991	33.8357	1.06517e-08	9.43434e-08
Chloroflexi	Anaerolineae	SBR1031	SJA-101	unclassified	NA	6.92973	7.42651	33.7121	1.13055e-08	9.65222e-08
Verrucomicrobia	Pedosphaerae	Pedosphaerales	unclassified	unclassified	NA	-9.08722	9.56602	33.6907	1.14226e-08	9.65222e-08
Proteobacteria	Deltaproteobacteria	unclassified	unclassified	unclassified	NA	6.4011	6.72385	33.6696	1.15392e-08	9.65222e-08
Acidobacteria	BPC102	MVS-40	unclassified	unclassified	NA	-7.97959	8.40541	33.6606	1.15896e-08	9.65222e-08
Gemmatimonadetes	Gemmatimonadetes	Ellin5290	unclassified	unclassified	NA	-8.4504	8.41553	33.4913	1.25747e-08	1.03186e-07
Proteobacteria	Gammaproteobacteria	Xanthomonadales	Xanthomonadaceae	Luteimonas	NA	-10.1998	10.9018	33.4572	1.27831e-08	1.03377e-07
Actinobacteria	unclassified	unclassified	unclassified	unclassified	NA	5.16027	6.51923	32.6693	1.86981e-08	1.4905e-07
Proteobacteria	Alphaproteobacteria	Sphingomonadales	Sphingomonadaceae	Novosphingobium	NA	9.33475	9.5589	32.5648	1.96673e-08	1.54568e-07
Armatimonadetes	Fimbriimonadia	Fimbriimonadales	Fimbriimonadaceae	unclassified	NA	5.21619	5.11847	32.4937	2.03542e-08	1.57745e-07
Chloroflexi	Chloroflexi	Chloroflexales	Chloroflexaceae	unclassified	NA	3.98994	4.16044	32.3944	2.13559e-08	1.63241e-07
Proteobacteria	Deltaproteobacteria	Myxococcales	Polyangiaceae	unclassified	NA	-9.95642	10.6788	31.477	3.32963e-08	2.51072e-07
Bacteroidetes	Cytophagia	Cytophagales	Cytophagaceae	Sporocytophaga	NA	4.94979	5.27808	30.5947	5.10944e-08	3.80142e-07
Bacteroidetes	Saprospirae	Saprospirales	Chitinophagaceae	Niabella	NA	8.13066	9.14601	30.4945	5.36445e-08	3.93864e-07
Actinobacteria	Thermoleophilia	Solirubrobacterales	Patulibacteraceae	unclassified	NA	-7.42145	8.22001	30.4626	5.44824e-08	3.9482e-07
Planctomycetes	Planctomycetia	Gemmatales	Gemmataceae	unclassified	NA	-6.3029	6.60024	30.1165	6.44708e-08	4.61214e-07
Bacteroidetes	Saprospirae	Saprospirales	Chitinophagaceae	Lacibacter	NA	-6.60502	7.33903	29.7898	7.55841e-08	5.29531e-07
Actinobacteria	Actinobacteria	Actinomycetales	Micromonosporaceae	Actinoplanes	NA	-7.21912	8.28274	29.7793	7.59733e-08	5.29531e-07
Actinobacteria	Actinobacteria	Actinomycetales	Kineosporiaceae	Kineosporia	NA	-3.22701	1.55409	29.7553	7.68675e-08	5.29531e-07
Proteobacteria	Alphaproteobacteria	Rhizobiales	Methylobacteriaceae	unclassified	NA	5.00139	5.8263	29.454	8.90198e-08	6.05769e-07
Chloroflexi	Anaerolineae	H39	unclassified	unclassified	NA	-3.85814	3.71862	29.3193	9.50645e-08	6.39108e-07
Actinobacteria	Actinobacteria	Actinomycetales	Streptomycetaceae	unclassified	NA	10.3955	11.9956	28.7037	1.28388e-07	8.52863e-07
Planctomycetes	Planctomycetia	Planctomycetales	Planctomycetaceae	Planctomyces	NA	4.52167	4.82028	28.3499	1.52625e-07	1.00194e-06
Proteobacteria	Gammaproteobacteria	Enterobacteriales	Enterobacteriaceae	Providencia	NA	-8.28173	9.79379	28.2958	1.56718e-07	1.01684e-06
Proteobacteria	Alphaproteobacteria	Rhodobacterales	Rhodobacteraceae	unclassified	NA	-4.4342	5.8974	27.7138	2.08378e-07	1.3365e-06
Proteobacteria	Betaproteobacteria	Burkholderiales	Oxalobacteraceae	Duganella	NA	4.26014	4.99511	27.1582	2.73649e-07	1.73518e-06
Bacteroidetes	Cytophagia	Cytophagales	Cytophagaceae	Pontibacter	NA	-4.28382	5.9462	26.6524	3.50831e-07	2.19959e-06
Chloroflexi	unclassified	unclassified	unclassified	unclassified	NA	-5.39343	7.77366	26.4996	3.78201e-07	2.33557e-06
Chlorobi	OPB56	unclassified	unclassified	unclassified	NA	6.59478	10.0806	26.4852	3.80891e-07	2.33557e-06
Chloroflexi	Thermomicrobia	unclassified	unclassified	unclassified	NA	-7.9827	9.35915	26.3948	3.98197e-07	2.41515e-06
WS3	PRR-12	Sediment-1	PRR-10	unclassified	NA	7.26151	9.20182	25.5974	5.89786e-07	3.53872e-06
Actinobacteria	Thermoleophilia	Solirubrobacterales	Conexibacteraceae	unclassified	NA	-6.0558	8.247	24.3515	1.09165e-06	6.48022e-06
Bacteroidetes	Sphingobacteriia	Sphingobacteriales	Sphingobacteriaceae	Mucilaginibacter	NA	-5.47745	6.78152	24.3095	1.11456e-06	6.54657e-06
Firmicutes	Bacilli	Lactobacillales	Streptococcaceae	Lactococcus	NA	-4.95703	8.21566	23.3863	1.76192e-06	1.02412e-05
Proteobacteria	Deltaproteobacteria	Myxococcales	Nannocystaceae	Nannocystis	NA	8.00014	9.98392	22.9061	2.23706e-06	1.28689e-05
Bacteroidetes	Flavobacteriia	Flavobacteriales	Weeksellaceae	unclassified	NA	-6.69894	9.18405	22.7711	2.39251e-06	1.36227e-05
Bacteroidetes	Cytophagia	Cytophagales	unclassified	unclassified	NA	4.3552	4.56343	22.6262	2.57153e-06	1.44941e-05
Actinobacteria	Actinobacteria	Actinomycetales	Cellulomonadaceae	Cellulomonas	NA	7.29741	10.2266	22.5689	2.64597e-06	1.47645e-05
Proteobacteria	Gammaproteobacteria	Xanthomonadales	Xanthomonadaceae	Achromobacter	NA	5.70992	8.54979	22.3697	2.92216e-06	1.61442e-05
Proteobacteria	Deltaproteobacteria	Myxococcales	Polyangiaceae	Chondromyces	NA	4.31295	9.94347	19.0876	1.51595e-05	8.29312e-05
Proteobacteria	Alphaproteobacteria	Rhizobiales	Brucellaceae	unclassified	NA	7.71504	11.4221	18.5765	1.96272e-05	0.00010633
Bacteroidetes	Flavobacteriia	Flavobacteriales	Flavobacteriaceae	unclassified	NA	-5.80548	9.06032	18.1779	2.40162e-05	0.000128856
Acidobacteria	Acidobacteriia	Acidobacteriales	Koribacteraceae	Candidatus Koribacter	NA	3.95071	6.14766	17.6839	3.08573e-05	0.000163985
Thermi	Deinococci	Deinococcales	Trueperaceae	unclassified	NA	-3.57241	5.49944	17.465	3.44874e-05	0.000181547
Proteobacteria	Gammaproteobacteria	Xanthomonadales	Xanthomonadaceae	Luteibacter	NA	-5.71466	9.18456	16.1479	6.75072e-05	0.000352047
Planctomycetes	Planctomycetia	Gemmatales	Gemmataceae	Gemmata	NA	4.2527	7.42668	15.5626	9.1107e-05	0.00047072
Actinobacteria	Actinobacteria	Actinomycetales	Intrasporangiaceae	unclassified	NA	-5.59213	9.43569	15.4887	9.46298e-05	0.000484435
NKB19	unclassified	unclassified	unclassified	unclassified	NA	3.03282	3.82191	15.1094	0.000114989	0.000583306
Proteobacteria	Deltaproteobacteria	Bdellovibrionales	Bdellovibrionaceae	Bdellovibrio	NA	-4.61816	7.83264	14.6068	0.00014895	0.000748776
Proteobacteria	Gammaproteobacteria	Xanthomonadales	Xanthomonadaceae	Dokdonella	NA	-4.52005	9.10533	11.8265	0.000632228	0.00314985
Planctomycetes	Phycisphaerae	CPla-3	unclassified	unclassified	NA	3.56121	6.69394	11.6303	0.00070082	0.00346068

## Sheet: NAM-30
Phylum	Class	Order	Family	Genus	Species	logFC	logCPM	F	PValue	FDR
Proteobacteria	Alphaproteobacteria	Rhizobiales	Rhizobiaceae	Shinella	NA	10.3528	7.55886	115.23	2.35832e-24	1.31594e-21
Proteobacteria	Alphaproteobacteria	Rhodospirillales	Rhodospirillaceae	Dongia	NA	-8.40042	5.40914	99.7739	1.46345e-21	2.76459e-19
Proteobacteria	Betaproteobacteria	IS-44	unclassified	unclassified	NA	8.1771	5.42838	99.7371	1.48634e-21	2.76459e-19
Actinobacteria	Actinobacteria	Actinomycetales	Microbacteriaceae	Curtobacterium	NA	7.82712	5.09488	94.0745	1.63771e-20	2.28461e-18
WS3	PRR-12	Sediment-1	CV106	unclassified	NA	7.34754	4.64714	92.8165	2.80002e-20	3.12482e-18
Actinobacteria	Actinobacteria	Actinomycetales	Streptosporangiaceae	Nonomuraea	NA	-8.20618	5.4832	91.037	5.99177e-20	5.57235e-18
Chloroflexi	Anaerolineae	SBR1031	unclassified	unclassified	NA	7.14558	4.45952	85.8932	5.47715e-19	4.36607e-17
Actinobacteria	Actinobacteria	Actinomycetales	Sporichthyaceae	unclassified	NA	6.65288	4.02367	81.972	3.00047e-18	1.96477e-16
Firmicutes	Bacilli	Turicibacterales	Turicibacteraceae	Turicibacter	NA	6.83118	4.58162	81.8465	3.16899e-18	1.96477e-16
Actinobacteria	Actinobacteria	Actinomycetales	Geodermatophilaceae	Modestobacter	NA	7.7567	6.09087	78.4269	1.41125e-17	7.87475e-16
Firmicutes	Bacilli	Bacillales	Thermoactinomycetaceae	unclassified	NA	-5.93426	3.13557	75.1113	6.06059e-17	3.07437e-15
Proteobacteria	Betaproteobacteria	Burkholderiales	Comamonadaceae	Rubrivivax	NA	8.04089	6.32871	74.4801	8.00668e-17	3.72311e-15
Chloroflexi	Chloroflexi	Chloroflexales	Chloroflexaceae	unclassified	NA	6.60607	4.16044	72.1149	2.27985e-16	9.4182e-15
Actinobacteria	Actinobacteria	Actinomycetales	Cellulomonadaceae	unclassified	NA	7.74266	6.08908	72.0341	2.36299e-16	9.4182e-15
Chloroflexi	TK10	AKYG885	5B-12	unclassified	NA	-5.30007	2.66365	66.931	2.29731e-15	8.54599e-14
Actinobacteria	Actinobacteria	Actinomycetales	Williamsiaceae	Williamsia	NA	-6.36064	4.81226	66.191	3.20085e-15	1.1163e-13
Firmicutes	Bacilli	Lactobacillales	Aerococcaceae	Aerococcus	NA	5.6498	3.17105	65.4117	4.54138e-15	1.49064e-13
Proteobacteria	Betaproteobacteria	Burkholderiales	Comamonadaceae	Ramlibacter	NA	-7.9159	7.86239	62.7201	1.52657e-14	4.73238e-13
Proteobacteria	Betaproteobacteria	Burkholderiales	Oxalobacteraceae	Herminiimonas	NA	6.79177	6.57235	60.8732	3.52078e-14	1.034e-12
Proteobacteria	Gammaproteobacteria	Vibrionales	Vibrionaceae	Listonella	NA	-8.47466	6.20189	59.1069	7.85227e-14	2.19078e-12
Chlorobi	unclassified	unclassified	unclassified	unclassified	NA	6.6757	4.87006	56.9948	2.05686e-13	5.46537e-12
Proteobacteria	Alphaproteobacteria	Sphingomonadales	Sphingomonadaceae	Sphingobium	NA	-5.23245	4.8835	55.8936	3.40379e-13	8.63326e-12
Proteobacteria	Gammaproteobacteria	Pseudomonadales	Moraxellaceae	Perlucidibaca	NA	-5.51116	3.73967	55.6699	3.77105e-13	9.14889e-12
Proteobacteria	Betaproteobacteria	Burkholderiales	Comamonadaceae	Pseudorhodoferax	NA	10.1866	9.35225	54.8929	5.38497e-13	1.252e-11
Proteobacteria	Betaproteobacteria	Burkholderiales	Burkholderiaceae	Burkholderia	NA	8.52399	8.27736	54.2512	7.23056e-13	1.61386e-11
Actinobacteria	Actinobacteria	Actinomycetales	Micromonosporaceae	Pilimelia	NA	-8.36144	7.49493	52.8255	1.39357e-12	2.94889e-11
MVP-21	unclassified	unclassified	unclassified	unclassified	NA	-5.80375	4.4149	52.7742	1.42688e-12	2.94889e-11
Proteobacteria	Deltaproteobacteria	Myxococcales	Polyangiaceae	Chondromyces	NA	-8.46388	9.94347	52.0881	1.95812e-12	3.90226e-11
Proteobacteria	Betaproteobacteria	Methylophilales	unclassified	unclassified	NA	5.19985	3.36318	50.0092	5.12334e-12	9.85802e-11
Actinobacteria	Actinobacteria	Actinomycetales	Propionibacteriaceae	Propionibacterium	NA	6.28094	4.97364	49.3939	6.81637e-12	1.26785e-10
Proteobacteria	Alphaproteobacteria	Rhodospirillales	Acetobacteraceae	Craurococcus	NA	-6.38139	5.46281	48.6497	9.63249e-12	1.73385e-10
Actinobacteria	Actinobacteria	Actinomycetales	Thermomonosporaceae	Spirillospora	NA	4.52653	2.36682	48.1395	1.22134e-11	2.09809e-10
Acidobacteria	Acidobacteriia	Acidobacteriales	Koribacteraceae	Candidatus Koribacter	NA	7.58299	6.14766	48.1056	1.24081e-11	2.09809e-10
Proteobacteria	Alphaproteobacteria	Rhizobiales	Bradyrhizobiaceae	Afipia	NA	4.51992	2.36265	48.0363	1.28147e-11	2.10312e-10
Proteobacteria	Alphaproteobacteria	Rhizobiales	Phyllobacteriaceae	unclassified	NA	8.60257	7.81853	47.8027	1.42876e-11	2.27785e-10
Proteobacteria	Alphaproteobacteria	Rhizobiales	Methylobacteriaceae	unclassified	NA	6.77046	5.8263	46.4842	2.64338e-11	4.09723e-10
Proteobacteria	Alphaproteobacteria	Sphingomonadales	unclassified	unclassified	NA	-9.21676	12.173	46.2416	2.96087e-11	4.46531e-10
Proteobacteria	Betaproteobacteria	Burkholderiales	unclassified	unclassified	NA	5.978	5.029	44.6735	6.17134e-11	9.06212e-10
Proteobacteria	Alphaproteobacteria	Rhizobiales	Aurantimonadaceae	unclassified	NA	7.13318	6.22631	44.1393	7.9306e-11	1.13469e-09
Proteobacteria	Gammaproteobacteria	Xanthomonadales	Xanthomonadaceae	Xanthomonas	NA	10.2963	11.1607	43.5917	1.0259e-10	1.43113e-09
Proteobacteria	Deltaproteobacteria	Bdellovibrionales	Bacteriovoracaceae	unclassified	NA	9.31249	8.06363	43.2923	1.18111e-10	1.60746e-09
Actinobacteria	Actinobacteria	Actinomycetales	Streptosporangiaceae	unclassified	NA	5.61026	6.93362	42.6688	1.5843e-10	2.10485e-09
Proteobacteria	Deltaproteobacteria	Bdellovibrionales	Bacteriovoracaceae	Peredibacter	NA	-5.28742	4.06599	42.5902	1.64406e-10	2.13345e-09
Armatimonadetes	Chthonomonadetes	Chthonomonadales	Chthonomonadaceae	unclassified	NA	-4.52169	3.1175	42.4357	1.76828e-10	2.2425e-09
Proteobacteria	Deltaproteobacteria	Myxococcales	Cystobacterineae	unclassified	NA	-4.99273	4.44125	42.2828	1.9006e-10	2.35675e-09
Firmicutes	Bacilli	Bacillales	Staphylococcaceae	Staphylococcus	NA	5.83988	6.53226	42.1742	2.00054e-10	2.42674e-09
Bacteroidetes	At12OctB3	unclassified	unclassified	unclassified	NA	5.25429	4.21276	41.7447	2.45028e-10	2.90906e-09
Proteobacteria	Alphaproteobacteria	Rhizobiales	Bradyrhizobiaceae	Bosea	NA	9.18483	8.10897	40.7554	3.91204e-10	4.45498e-09
Bacteroidetes	Flavobacteriia	Flavobacteriales	Weeksellaceae	unclassified	NA	-10.5729	9.18405	40.7554	3.91208e-10	4.45498e-09
Proteobacteria	Gammaproteobacteria	Legionellales	unclassified	unclassified	NA	-6.23701	5.30116	39.7177	6.39809e-10	7.12484e-09
Acidobacteria	AT-s54	unclassified	unclassified	unclassified	NA	5.0144	4.45535	39.6805	6.51195e-10	7.12484e-09
Actinobacteria	Actinobacteria	Bifidobacteriales	Bifidobacteriaceae	Gardnerella	NA	3.90886	2.03837	39.104	8.56356e-10	9.18936e-09
Proteobacteria	Deltaproteobacteria	Myxococcales	Myxococcaceae	Myxococcus	NA	7.66157	7.31664	38.9962	9.01408e-10	9.49029e-09
Proteobacteria	Gammaproteobacteria	Xanthomonadales	Xanthomonadaceae	Achromobacter	NA	8.4703	8.54979	38.9007	9.43287e-10	9.7473e-09
Chloroflexi	TK10	AKYG885	unclassified	unclassified	NA	7.51277	7.34665	38.1962	1.3191e-09	1.33828e-08
Proteobacteria	Alphaproteobacteria	Rhodobacterales	Rhodobacteraceae	unclassified	NA	-5.4721	5.8974	38.08	1.3942e-09	1.38922e-08
Verrucomicrobia	unclassified	unclassified	unclassified	unclassified	NA	-7.55697	7.61152	37.1815	2.1403e-09	2.09524e-08
Chloroflexi	SAR202	unclassified	unclassified	unclassified	NA	-6.50044	6.52427	37.1	2.22536e-09	2.14095e-08
Proteobacteria	Deltaproteobacteria	Myxococcales	Polyangiaceae	Polyangium	NA	5.81732	6.42766	36.728	2.65827e-09	2.51409e-08
Proteobacteria	Betaproteobacteria	Burkholderiales	Oxalobacteraceae	Duganella	NA	5.04662	4.99511	35.8081	4.12895e-09	3.83992e-08
Actinobacteria	Actinobacteria	Actinomycetales	Microbacteriaceae	Mycetocola	NA	-6.12103	7.73208	34.5903	7.40833e-09	6.7768e-08
Proteobacteria	Deltaproteobacteria	Myxococcales	Myxococcaceae	Corallococcus	NA	-4.29691	5.64728	34.3368	8.36872e-09	7.53185e-08
Actinobacteria	Actinobacteria	Actinomycetales	Corynebacteriaceae	Corynebacterium	NA	4.23261	4.07845	34.2568	8.69696e-09	7.70302e-08
TM7	SC3	unclassified	unclassified	unclassified	NA	-5.06432	4.78373	34.0089	9.7991e-09	8.41421e-08
NKB19	TSBW08	unclassified	unclassified	unclassified	NA	-6.35319	6.86212	34.0084	9.8015e-09	8.41421e-08
Acidobacteria	BPC102	MVS-40	unclassified	unclassified	NA	-8.02143	8.40541	33.8051	1.08096e-08	9.13907e-08
Proteobacteria	Alphaproteobacteria	Rhizobiales	Bradyrhizobiaceae	Blastobacter	NA	5.3312	5.00144	33.2934	1.38341e-08	1.15216e-07
Proteobacteria	Gammaproteobacteria	Xanthomonadales	Xanthomonadaceae	Dyella	NA	6.98982	7.97976	33.0588	1.54919e-08	1.27125e-07
Proteobacteria	Deltaproteobacteria	Myxococcales	Nannocystaceae	Nannocystis	NA	10.5761	9.98392	32.8036	1.7524e-08	1.41716e-07
Actinobacteria	Actinobacteria	Actinomycetales	Cellulomonadaceae	Cellulomonas	NA	9.2833	10.2266	31.0628	4.07056e-08	3.24482e-07
Bacteroidetes	Cytophagia	Cytophagales	Cytophagaceae	Rhodocytophaga	NA	5.62781	5.67016	31.0224	4.15126e-08	3.26254e-07
Actinobacteria	Actinobacteria	Actinomycetales	Streptomycetaceae	unclassified	NA	10.9847	11.9956	30.7316	4.7807e-08	3.70504e-07
Actinobacteria	Actinobacteria	Actinomycetales	Micromonosporaceae	Micromonospora	NA	9.20818	10.5711	29.9651	6.94008e-08	5.30488e-07
Planctomycetes	Planctomycetia	Gemmatales	Gemmataceae	unclassified	NA	-6.26972	6.60024	29.935	7.04256e-08	5.31047e-07
Actinobacteria	Actinobacteria	Actinomycetales	Kineosporiaceae	Kineosporia	NA	-3.226	1.55409	29.743	7.73259e-08	5.75305e-07
Bacteroidetes	Saprospirae	Saprospirales	Chitinophagaceae	Lacibacter	NA	-6.53752	7.33903	29.4331	8.99353e-08	6.60315e-07
Proteobacteria	Alphaproteobacteria	Rhodobacterales	Rhodobacteraceae	Rhodobacter	NA	-8.3514	9.27281	28.7423	1.2599e-07	9.13021e-07
Proteobacteria	Alphaproteobacteria	Rhizobiales	Rhizobiaceae	Kaistia	NA	6.48515	7.45686	28.4036	1.48673e-07	1.06359e-06
Proteobacteria	Alphaproteobacteria	Rhizobiales	Phyllobacteriaceae	Aminobacter	NA	-7.8597	9.14753	28.2671	1.5893e-07	1.12197e-06
Proteobacteria	Gammaproteobacteria	Enterobacteriales	Enterobacteriaceae	Providencia	NA	-8.28114	9.79379	28.2425	1.60855e-07	1.12197e-06
Proteobacteria	Alphaproteobacteria	Rhizobiales	Brucellaceae	unclassified	NA	10.3369	11.4221	27.1483	2.74976e-07	1.89428e-06
Proteobacteria	Deltaproteobacteria	Myxococcales	OM27	unclassified	NA	7.31973	8.43689	26.8165	3.23647e-07	2.20238e-06
Bacteroidetes	Cytophagia	Cytophagales	Cytophagaceae	Pontibacter	NA	-4.28307	5.9462	26.6463	3.51882e-07	2.36566e-06
Actinobacteria	Thermoleophilia	Gaiellales	unclassified	unclassified	NA	-5.2321	5.56619	26.4845	3.8102e-07	2.53106e-06
Armatimonadetes	Fimbriimonadia	Fimbriimonadales	Fimbriimonadaceae	Fimbriimonas	NA	-8.09186	10.8013	26.4595	3.85727e-07	2.53218e-06
Chlorobi	OPB56	unclassified	unclassified	unclassified	NA	6.46078	10.0806	25.766	5.4273e-07	3.52143e-06
Verrucomicrobia	Opitutae	Opitutales	Opitutaceae	Opitutus	NA	-5.69092	7.02305	25.5809	5.94603e-07	3.81366e-06
Chloroflexi	Anaerolineae	Caldilineales	Caldilineaceae	Caldilinea	NA	-10.0559	12.7068	24.3323	1.10206e-06	6.98809e-06
Proteobacteria	Deltaproteobacteria	unclassified	unclassified	unclassified	NA	5.14144	6.72385	24.2157	1.16756e-06	7.32022e-06
Thermi	Deinococci	Deinococcales	Trueperaceae	unclassified	NA	4.19317	5.49944	24.0198	1.2866e-06	7.92173e-06
Proteobacteria	Betaproteobacteria	Nitrosomonadales	Nitrosomonadaceae	unclassified	NA	-7.21681	9.27462	24.0116	1.2919e-06	7.92173e-06
Actinobacteria	Actinobacteria	Actinomycetales	Frankiaceae	unclassified	NA	8.65231	12.1297	23.9034	1.36305e-06	8.26717e-06
Proteobacteria	Gammaproteobacteria	Legionellales	Coxiellaceae	unclassified	NA	5.3685	6.24914	23.6132	1.57416e-06	9.44495e-06
Firmicutes	Bacilli	Lactobacillales	Streptococcaceae	Lactococcus	NA	-4.95639	8.21566	23.3824	1.76535e-06	1.04794e-05
Chloroflexi	TK10	AKYG885	23	unclassified	NA	-4.12994	5.81413	23.2474	1.88779e-06	1.10883e-05
TM7	TM7-3	unclassified	unclassified	unclassified	NA	-7.73008	9.69125	22.8958	2.24854e-06	1.30696e-05
Planctomycetes	Planctomycetia	Pirellulales	Pirellulaceae	A17	NA	3.63145	3.73478	22.6694	2.5168e-06	1.44781e-05
Proteobacteria	Betaproteobacteria	Burkholderiales	Comamonadaceae	Delftia	NA	-9.92793	13.1384	22.5594	2.65851e-06	1.51372e-05
Proteobacteria	Alphaproteobacteria	Sphingomonadales	Sphingomonadaceae	Novosphingobium	NA	7.08425	9.5589	22.5094	2.72557e-06	1.53623e-05
Elusimicrobia	Elusimicrobia	FAC88	unclassified	unclassified	NA	3.57492	5.19066	21.6278	4.23212e-06	2.36152e-05
Chloroflexi	TK10	WMSP1	FFCH4570	unclassified	NA	4.24683	5.03048	21.5701	4.35588e-06	2.40652e-05
Chloroflexi	Anaerolineae	SBR1031	oc28	unclassified	NA	-3.19912	3.35181	21.0338	5.69705e-06	3.11496e-05
Proteobacteria	Betaproteobacteria	Nitrosomonadales	Nitrosomonadaceae	Nitrosospira	NA	-3.58055	4.50035	21.0154	5.74984e-06	3.11496e-05
Firmicutes	Bacilli	Bacillales	Exiguobacteraceae	Exiguobacterium	NA	-6.92719	10.1471	19.7615	1.07932e-05	5.79095e-05
OD1	unclassified	unclassified	unclassified	unclassified	NA	-5.25674	8.92277	19.1068	1.50135e-05	7.97861e-05
Chloroflexi	Anaerolineae	SBR1031	SJA-101	unclassified	NA	4.59988	7.42651	18.2162	2.3555e-05	0.000123997
Bacteroidetes	Flavobacteriia	Flavobacteriales	Flavobacteriaceae	unclassified	NA	5.45389	9.06032	16.3006	6.24342e-05	0.000325592
Proteobacteria	Alphaproteobacteria	Rickettsiales	Rickettsiaceae	unclassified	NA	3.52744	5.82832	16.2454	6.42223e-05	0.000331815
Proteobacteria	Alphaproteobacteria	Rhizobiales	Beijerinckiaceae	Chelatococcus	NA	2.7601	5.3709	15.6509	8.70736e-05	0.000445753
Actinobacteria	Actinobacteria	Actinomycetales	Actinosynnemataceae	unclassified	NA	3.99961	6.44869	15.3641	0.00010088	0.000511737
Bacteroidetes	Cytophagia	Cytophagales	unclassified	unclassified	NA	3.36654	4.56343	14.483	0.000158774	0.000798162
Verrucomicrobia	Spartobacteria	Chthoniobacterales	Chthoniobacteraceae	OR-59	NA	-6.2718	11.8786	14.0244	0.000201228	0.00100255
Actinobacteria	Actinobacteria	Actinomycetales	Glycomycetaceae	Glycomyces	NA	-3.43836	4.95852	14.0033	0.000203433	0.00100456
Proteobacteria	Deltaproteobacteria	Spirobacillales	unclassified	unclassified	NA	4.47604	7.74681	13.8542	0.000219758	0.00107372
Proteobacteria	Alphaproteobacteria	Rhizobiales	Bradyrhizobiaceae	unclassified	NA	-4.84801	8.55095	13.8408	0.000221286	0.00107372
Proteobacteria	Deltaproteobacteria	MIZ46	unclassified	unclassified	NA	3.31429	6.26726	11.8402	0.000627691	0.00301941
Cyanobacteria	ML635J-21	unclassified	unclassified	unclassified	NA	4.7841	11.2362	11.0699	0.000941349	0.00448951
Firmicutes	Bacilli	Bacillales	Paenibacillaceae	Paenibacillus	NA	-5.65129	13.5484	11.0409	0.000955828	0.00451993
Bacteroidetes	Sphingobacteriia	Sphingobacteriales	Sphingobacteriaceae	unclassified	NA	5.00292	10.5509	11.0058	0.00097371	0.0045658
Actinobacteria	Actinobacteria	Actinomycetales	Geodermatophilaceae	Blastococcus	NA	-3.15804	7.11571	10.3513	0.00137682	0.00640223
Bacteroidetes	Saprospirae	Saprospirales	Chitinophagaceae	Niabella	NA	3.93878	9.14601	10.3065	0.00141002	0.00650239
Verrucomicrobia	Spartobacteria	Chthoniobacterales	Chthoniobacteraceae	DA101	NA	-5.08921	12.478	10.0993	0.00157408	0.00719948
Gemmatimonadetes	Gemmatimonadetes	Ellin5290	unclassified	unclassified	NA	-3.65014	8.41553	9.80398	0.00184221	0.00835736

## Sheet: NAM-32
Phylum	Class	Order	Family	Genus	Species	logFC	logCPM	F	PValue	FDR
Proteobacteria	Alphaproteobacteria	Rhodospirillales	Rhodospirillaceae	Dongia	NA	-8.09135	5.40914	95.8773	7.60906e-21	3.46181e-18
Proteobacteria	Alphaproteobacteria	Sphingomonadales	Sphingomonadaceae	Sphingobium	NA	-7.73295	4.8835	94.7266	1.24079e-20	3.46181e-18
Actinobacteria	Actinobacteria	Actinomycetales	Geodermatophilaceae	Modestobacter	NA	7.96267	6.09087	81.2789	4.05808e-18	7.54802e-16
Firmicutes	Bacilli	Bacillales	Thermoactinomycetaceae	unclassified	NA	-5.77536	3.13557	72.5627	1.86947e-16	2.60791e-14
Actinobacteria	Actinobacteria	Actinomycetales	Actinosynnemataceae	Kibdelosporangium	NA	-7.24168	6.74856	69.3072	7.9445e-16	8.86606e-14
Proteobacteria	Alphaproteobacteria	Rhodobacterales	Rhodobacteraceae	unclassified	NA	-8.29348	5.8974	66.4712	2.82294e-15	2.62534e-13
Proteobacteria	Gammaproteobacteria	Enterobacteriales	Enterobacteriaceae	Moellerella	NA	5.56878	3.10505	64.5293	6.75295e-15	4.77575e-13
Chloroflexi	TK10	AKYG885	5B-12	unclassified	NA	-5.1402	2.66365	64.2676	7.59704e-15	4.77575e-13
Actinobacteria	Actinobacteria	Actinomycetales	Williamsiaceae	Williamsia	NA	-6.21209	4.81226	64.2369	7.70282e-15	4.77575e-13
Proteobacteria	Deltaproteobacteria	Myxococcales	Polyangiaceae	Polyangium	NA	8.43272	6.42766	61.9862	2.12697e-14	1.18685e-12
Proteobacteria	Betaproteobacteria	Burkholderiales	Comamonadaceae	Ramlibacter	NA	-7.78374	7.86239	61.4897	2.66285e-14	1.35079e-12
Actinobacteria	Actinobacteria	Actinomycetales	Promicromonosporaceae	Cellulosimicrobium	NA	8.04004	7.72194	60.3177	4.52967e-14	2.1063e-12
GAL15	unclassified	unclassified	unclassified	unclassified	NA	6.3473	4.23164	58.6688	9.58492e-14	4.11414e-12
Actinobacteria	Actinobacteria	Actinomycetales	Nocardioidaceae	Marmoricola	NA	5.05398	2.71942	57.2513	1.82942e-13	7.29155e-12
Proteobacteria	Gammaproteobacteria	Pseudomonadales	Moraxellaceae	Perlucidibaca	NA	-5.35605	3.73967	53.613	9.69665e-13	3.60715e-11
Proteobacteria	Gammaproteobacteria	Xanthomonadales	Xanthomonadaceae	Dyella	NA	9.80481	7.97976	51.9449	2.09196e-12	7.29573e-11
Proteobacteria	Deltaproteobacteria	Myxococcales	Polyangiaceae	Chondromyces	NA	-8.33851	9.94347	51.1724	2.98949e-12	9.81257e-11
MVP-21	unclassified	unclassified	unclassified	unclassified	NA	-5.65301	4.4149	50.992	3.2498e-12	1.00744e-10
Bacteroidetes	Bacteroidia	Bacteroidales	unclassified	unclassified	NA	6.86831	5.19814	50.3337	4.40783e-12	1.29451e-10
WS3	PRR-12	LD1-PA13	unclassified	unclassified	NA	-6.23514	5.09027	49.925	5.32731e-12	1.48632e-10
Proteobacteria	Alphaproteobacteria	Rhodospirillales	Acetobacteraceae	Craurococcus	NA	-6.23596	5.46281	47.2395	1.85782e-11	4.93648e-10
Actinobacteria	Actinobacteria	Actinomycetales	Cryptosporangiaceae	Cryptosporangium	NA	5.05224	5.18641	46.1692	3.06279e-11	7.76835e-10
Bacteroidetes	Bac22	unclassified	unclassified	unclassified	NA	-5.48567	5.42918	45.8494	3.55704e-11	8.58397e-10
Proteobacteria	Deltaproteobacteria	Bdellovibrionales	Bacteriovoracaceae	unclassified	NA	9.71562	8.06363	45.7698	3.69203e-11	8.58397e-10
Bacteroidetes	At12OctB3	unclassified	unclassified	unclassified	NA	5.56595	4.21276	45.6683	3.87172e-11	8.64167e-10
Armatimonadetes	Fimbriimonadia	Fimbriimonadales	Fimbriimonadaceae	unclassified	NA	6.52098	5.11847	45.4587	4.27085e-11	9.1659e-10
Elusimicrobia	Elusimicrobia	IIb	unclassified	unclassified	NA	-6.09057	5.37591	44.1447	7.91038e-11	1.63481e-09
Verrucomicrobia	Methylacidiphilae	S-BQ2-57	unclassified	unclassified	NA	5.84623	6.7331	42.9222	1.40596e-10	2.80187e-09
Proteobacteria	TA18	CV90	unclassified	unclassified	NA	4.71587	3.56155	42.7519	1.52338e-10	2.93119e-09
Firmicutes	Clostridia	Clostridiales	Lachnospiraceae	Clostridium	NA	5.61294	8.03358	42.069	2.10233e-10	3.91034e-09
Proteobacteria	Deltaproteobacteria	Bdellovibrionales	Bacteriovoracaceae	Peredibacter	NA	-5.13454	4.06599	40.9413	3.58256e-10	6.44861e-09
Armatimonadetes	Chthonomonadetes	Chthonomonadales	Chthonomonadaceae	unclassified	NA	-4.36275	3.1175	40.348	4.74489e-10	8.27389e-09
Proteobacteria	Deltaproteobacteria	Myxococcales	Polyangiaceae	Aetherobacter	NA	9.15258	9.05663	40.1007	5.33504e-10	9.02107e-09
Proteobacteria	Gammaproteobacteria	Legionellales	Coxiellaceae	unclassified	NA	7.6438	6.24914	39.488	7.13539e-10	1.17104e-08
Verrucomicrobia	Pedosphaerae	Pedosphaerales	R4-41B	unclassified	NA	6.5056	6.64713	39.2436	8.01394e-10	1.24378e-08
Bacteroidetes	Flavobacteriia	Flavobacteriales	Weeksellaceae	Elizabethkingia	NA	7.53423	8.47123	39.2408	8.02441e-10	1.24378e-08
Proteobacteria	Gammaproteobacteria	Legionellales	unclassified	unclassified	NA	-6.09085	5.30116	38.5262	1.12724e-09	1.7e-08
Chloroflexi	TK10	AKYG885	unclassified	unclassified	NA	7.49187	7.34665	38.0502	1.41412e-09	2.07652e-08
WS2	Kazan-3B-09	unclassified	unclassified	unclassified	NA	3.76914	1.92996	36.5509	2.89326e-09	4.0682e-08
Bacteroidetes	Saprospirae	Saprospirales	Chitinophagaceae	Chitinophaga	NA	-9.84298	9.15172	36.5343	2.91627e-09	4.0682e-08
Proteobacteria	Gammaproteobacteria	Pseudomonadales	Moraxellaceae	unclassified	NA	6.12161	5.4335	36.3917	3.12232e-09	4.2494e-08
Verrucomicrobia	Verrucomicrobiae	Verrucomicrobiales	Verrucomicrobiaceae	Luteolibacter	NA	6.16962	6.05272	36.253	3.33659e-09	4.43289e-08
Proteobacteria	Deltaproteobacteria	Myxococcales	OM27	unclassified	NA	9.08559	8.43689	35.8016	4.1419e-09	5.37484e-08
Planctomycetes	Planctomycetia	Gemmatales	Gemmataceae	Gemmata	NA	7.31675	7.42668	35.3799	5.07026e-09	6.43002e-08
Actinobacteria	Actinobacteria	Actinomycetales	Microbacteriaceae	Mycetocola	NA	-6.16408	7.73208	34.7975	6.70593e-09	8.31536e-08
Proteobacteria	Deltaproteobacteria	FAC87	unclassified	unclassified	NA	4.41832	4.11948	34.5724	7.47216e-09	9.06406e-08
Chloroflexi	Anaerolineae	unclassified	unclassified	unclassified	NA	5.91305	5.74877	33.6662	1.15582e-08	1.36103e-07
Proteobacteria	Alphaproteobacteria	Rickettsiales	Rickettsiaceae	unclassified	NA	5.48554	5.82832	33.6395	1.17078e-08	1.36103e-07
Proteobacteria	Alphaproteobacteria	Rhizobiales	Bradyrhizobiaceae	Blastobacter	NA	5.34947	5.00144	33.4713	1.26965e-08	1.42825e-07
Actinobacteria	Actinobacteria	Actinomycetales	Micromonosporaceae	Micromonospora	NA	10.0377	10.5711	33.4548	1.27979e-08	1.42825e-07
Actinobacteria	Actinobacteria	Actinomycetales	Nocardioidaceae	Nocardioides	NA	9.03238	10.5276	33.0843	1.53027e-08	1.66353e-07
NKB19	TSBW08	unclassified	unclassified	unclassified	NA	-6.21682	6.86212	33.0574	1.55024e-08	1.66353e-07
Proteobacteria	Gammaproteobacteria	Xanthomonadales	Xanthomonadaceae	Achromobacter	NA	7.48002	8.54979	32.8831	1.6864e-08	1.77549e-07
Proteobacteria	Deltaproteobacteria	Myxococcales	Myxococcaceae	Corallococcus	NA	-4.15262	5.64728	32.6497	1.88767e-08	1.93749e-07
Proteobacteria	Deltaproteobacteria	Myxococcales	Myxococcaceae	Myxococcus	NA	6.73632	7.31664	32.6256	1.90971e-08	1.93749e-07
Proteobacteria	Gammaproteobacteria	Chromatiales	unclassified	unclassified	NA	4.95775	4.50834	32.3992	2.13058e-08	2.12297e-07
Proteobacteria	Alphaproteobacteria	Sphingomonadales	Sphingomonadaceae	Sphingosinicella	NA	-3.94577	2.93816	31.758	2.90578e-08	2.8446e-07
TM7	unclassified	unclassified	unclassified	unclassified	NA	-8.22892	8.52359	31.3538	3.53471e-08	3.40063e-07
Proteobacteria	Alphaproteobacteria	Rhizobiales	Phyllobacteriaceae	unclassified	NA	6.29821	7.81853	31.0713	4.05382e-08	3.83395e-07
Planctomycetes	Planctomycetia	Gemmatales	Gemmataceae	unclassified	NA	-6.16445	6.60024	29.2558	9.80555e-08	9.11916e-07
Actinobacteria	Actinobacteria	Actinomycetales	Cellulomonadaceae	Cellulomonas	NA	8.69767	10.2266	28.55	1.38402e-07	1.26604e-06
Bacteroidetes	Cytophagia	Cytophagales	unclassified	unclassified	NA	4.95557	4.56343	27.9473	1.85866e-07	1.67279e-06
Proteobacteria	Gammaproteobacteria	Enterobacteriales	Enterobacteriaceae	Providencia	NA	-8.15541	9.79379	27.7142	2.08342e-07	1.84531e-06
Chloroflexi	Anaerolineae	H39	unclassified	unclassified	NA	-3.70197	3.71862	27.5592	2.2479e-07	1.95989e-06
Actinobacteria	Actinobacteria	Actinomycetales	Kineosporiaceae	Kineosporia	NA	-3.06368	1.55409	27.4297	2.39522e-07	2.0562e-06
Planctomycetes	Planctomycetia	Pirellulales	Pirellulaceae	A17	NA	4.03409	3.73478	27.2337	2.6369e-07	2.22938e-06
Proteobacteria	Alphaproteobacteria	BD7-3	unclassified	unclassified	NA	-6.33419	6.78253	26.703	3.42208e-07	2.85003e-06
Proteobacteria	Gammaproteobacteria	Enterobacteriales	Enterobacteriaceae	Pseudomonas	NA	-6.40364	6.91243	26.1364	4.52201e-07	3.71071e-06
Cyanobacteria	ML635J-21	unclassified	unclassified	unclassified	NA	8.63912	11.2362	25.8016	5.33278e-07	4.3126e-06
Chloroflexi	Chloroflexi	Chloroflexales	unclassified	unclassified	NA	4.16652	5.09899	25.4749	6.26508e-07	4.99417e-06
Bacteroidetes	Cytophagia	Cytophagales	Cytophagaceae	Pontibacter	NA	-4.14115	5.9462	25.347	6.67333e-07	5.24467e-06
Actinobacteria	Thermoleophilia	Gaiellales	unclassified	unclassified	NA	-5.01873	5.56619	25.0627	7.67897e-07	5.9512e-06
Chlorobi	SJA-28	unclassified	unclassified	unclassified	NA	3.35367	2.72791	24.3532	1.09071e-06	8.33723e-06
Chloroflexi	Anaerolineae	SBR1031	SJA-101	unclassified	NA	5.52112	7.42651	24.1821	1.18717e-06	8.85836e-06
Firmicutes	Clostridia	Clostridiales	Lachnospiraceae	Coprococcus	NA	2.94463	1.57052	24.1762	1.19064e-06	8.85836e-06
WS3	PRR-12	Sediment-1	PRR-10	unclassified	NA	6.93459	9.20182	24.0497	1.26769e-06	9.30754e-06
Bacteroidetes	Saprospirae	Saprospirales	Chitinophagaceae	Trachelomonas	NA	5.69944	7.96313	24.0225	1.28488e-06	9.31123e-06
Proteobacteria	Deltaproteobacteria	Myxococcales	Nannocystaceae	Nannocystis	NA	7.97909	9.98392	22.8106	2.34588e-06	1.67812e-05
Proteobacteria	Gammaproteobacteria	Xanthomonadales	Xanthomonadaceae	Xanthomonas	NA	6.33562	11.1607	22.7852	2.37583e-06	1.67812e-05
Firmicutes	Bacilli	Lactobacillales	Streptococcaceae	Lactococcus	NA	-4.82573	8.21566	22.4961	2.74369e-06	1.91372e-05
Bacteroidetes	Cytophagia	Cytophagales	Cytophagaceae	Hymenobacter	NA	-6.78375	8.43609	22.3582	2.93896e-06	2.02462e-05
Chloroflexi	TK10	AKYG885	23	unclassified	NA	-3.98702	5.81413	22.0522	3.42371e-06	2.32979e-05
Proteobacteria	Alphaproteobacteria	Rhizobiales	Brucellaceae	unclassified	NA	8.69751	11.4221	21.7799	3.92228e-06	2.63691e-05
Proteobacteria	Gammaproteobacteria	Pseudomonadales	Pseudomonadaceae	unclassified	NA	-5.42516	6.92702	20.1193	9.01482e-06	5.98842e-05
Proteobacteria	Betaproteobacteria	Nitrosomonadales	Nitrosomonadaceae	Nitrosospira	NA	-3.43029	4.50035	19.6658	1.1326e-05	7.43519e-05
Chloroflexi	Anaerolineae	SBR1031	oc28	unclassified	NA	-3.06044	3.35181	19.5842	1.18011e-05	7.65702e-05
Bacteroidetes	Cytophagia	Cytophagales	Cytophagaceae	Rhodocytophaga	NA	4.17935	5.67016	19.2598	1.38977e-05	8.91372e-05
Proteobacteria	Alphaproteobacteria	Rhizobiales	Bradyrhizobiaceae	Bosea	NA	5.34021	8.10897	19.0324	1.55884e-05	9.88213e-05
Proteobacteria	Betaproteobacteria	Burkholderiales	Oxalobacteraceae	Massilia	NA	8.16198	12.2108	19.0105	1.57618e-05	9.88213e-05
Bacteroidetes	Flavobacteriia	Flavobacteriales	Cryomorphaceae	Fluviicola	NA	-6.07649	9.10897	18.4414	2.10165e-05	0.000130302
Proteobacteria	Deltaproteobacteria	Spirobacillales	unclassified	unclassified	NA	-5.29956	7.74681	18.0483	2.56472e-05	0.000157265
Actinobacteria	Actinobacteria	Actinomycetales	Frankiaceae	unclassified	NA	6.71289	12.1297	16.9765	4.4222e-05	0.000268216
Actinobacteria	Thermoleophilia	Gaiellales	Gaiellaceae	Gaiella	NA	2.65492	2.29015	16.5968	5.36702e-05	0.000322021
Verrucomicrobia	Spartobacteria	Chthoniobacterales	Chthoniobacteraceae	Ellin506	NA	-5.60893	10.7914	15.4713	9.54759e-05	0.000566761
Gemmatimonadetes	Gemm-2	unclassified	unclassified	unclassified	NA	-4.17752	7.37876	14.7379	0.000139221	0.000817739
Actinobacteria	Actinobacteria	Actinomycetales	Glycomycetaceae	Glycomyces	NA	-3.57317	4.95852	14.6834	0.000143186	0.000832266
Proteobacteria	unclassified	unclassified	unclassified	unclassified	NA	4.662	8.16645	14.3557	0.000169557	0.000975392
Actinobacteria	Actinobacteria	Actinomycetales	Streptomycetaceae	unclassified	NA	6.15515	11.9956	14.2191	0.000181953	0.00103602
Proteobacteria	Deltaproteobacteria	Bdellovibrionales	Bdellovibrionaceae	Bdellovibrio	NA	-4.4565	7.83264	13.8677	0.000218226	0.00123
Proteobacteria	Gammaproteobacteria	Xanthomonadales	Xanthomonadaceae	Dokdonella	NA	4.7137	9.10533	12.5324	0.000436926	0.00243805
Actinobacteria	Actinobacteria	Actinomycetales	Nocardiaceae	Nocardia	NA	3.76823	8.77705	11.2796	0.000842824	0.0046564
Actinobacteria	Actinobacteria	Actinomycetales	Intrasporangiaceae	unclassified	NA	4.32717	9.43569	10.3146	0.0014039	0.00768015

## Sheet: NAM-37
Phylum	Class	Order	Family	Genus	Species	logFC	logCPM	F	PValue	FDR
Proteobacteria	Alphaproteobacteria	Rhodospirillales	Rhodospirillaceae	Dongia	NA	-8.32599	5.40914	98.8675	2.14529e-21	1.19707e-18
Proteobacteria	Alphaproteobacteria	Sphingomonadales	Sphingomonadaceae	Sphingobium	NA	-7.80539	4.8835	95.6458	8.39498e-21	2.3422e-18
Proteobacteria	Alphaproteobacteria	Caulobacterales	unclassified	unclassified	NA	7.423	4.7155	92.084	3.82859e-20	7.12118e-18
Actinobacteria	Actinobacteria	Actinomycetales	Streptosporangiaceae	Nonomuraea	NA	-8.13193	5.4832	90.1847	8.63335e-20	1.20435e-17
TM6	SBRH58	unclassified	unclassified	unclassified	NA	7.20669	4.5153	87.8602	2.34427e-19	2.61621e-17
Actinobacteria	Actinobacteria	Actinomycetales	Nocardiaceae	unclassified	NA	6.29539	3.70323	74.868	6.74708e-17	6.27479e-15
Firmicutes	Bacilli	Bacillales	Thermoactinomycetaceae	unclassified	NA	-5.85291	3.13557	73.8106	1.07618e-16	8.57869e-15
Actinobacteria	Actinobacteria	Actinomycetales	Actinosynnemataceae	Kibdelosporangium	NA	-7.30874	6.74856	70.0282	5.76192e-16	4.01894e-14
Proteobacteria	Alphaproteobacteria	Rhodobacterales	Rhodobacteraceae	unclassified	NA	-8.25181	5.8974	66.2034	3.1831e-15	1.97352e-13
Chloroflexi	TK10	AKYG885	5B-12	unclassified	NA	-5.21822	2.66365	65.5709	4.22791e-15	2.35918e-13
Actinobacteria	Actinobacteria	Actinomycetales	Williamsiaceae	Williamsia	NA	-6.2847	4.81226	65.1947	5.00652e-15	2.53967e-13
Actinobacteria	Actinobacteria	Actinomycetales	Micrococcaceae	unclassified	NA	7.77677	6.41581	62.5414	1.65487e-14	7.69515e-13
Proteobacteria	Betaproteobacteria	Burkholderiales	Alcaligenaceae	Bordetella	NA	7.17149	5.61795	61.1192	3.14936e-14	1.3518e-12
Proteobacteria	Gammaproteobacteria	Vibrionales	Vibrionaceae	Listonella	NA	-8.40312	6.20189	58.5814	9.97419e-14	3.97543e-12
Proteobacteria	Betaproteobacteria	Burkholderiales	Comamonadaceae	Ramlibacter	NA	-7.31532	7.86239	57.1909	1.88055e-13	6.99564e-12
Verrucomicrobia	Methylacidiphilae	Methylacidiphilales	LD19	unclassified	NA	8.68417	6.69323	56.4951	2.58471e-13	9.01418e-12
Proteobacteria	Gammaproteobacteria	Pseudomonadales	Moraxellaceae	Perlucidibaca	NA	-5.4318	3.73967	54.6201	6.10347e-13	2.00338e-11
Actinobacteria	Actinobacteria	Actinomycetales	Micromonosporaceae	Pilimelia	NA	-8.5469	7.49493	54.2475	7.24283e-13	2.24528e-11
MVP-21	unclassified	unclassified	unclassified	unclassified	NA	-5.72667	4.4149	51.8651	2.17052e-12	6.37447e-11
Proteobacteria	Deltaproteobacteria	Myxococcales	Polyangiaceae	Chondromyces	NA	-8.40001	9.94347	51.6369	2.4118e-12	6.72893e-11
WS3	PRR-12	LD1-PA13	unclassified	unclassified	NA	-6.30709	5.09027	50.6612	3.78737e-12	1.00636e-10
Proteobacteria	Gammaproteobacteria	Pasteurellales	Pasteurellaceae	Actinobacillus	NA	4.54926	2.37929	48.6305	9.7189e-12	2.46507e-10
Proteobacteria	Alphaproteobacteria	Rhodospirillales	Acetobacteraceae	Craurococcus	NA	-6.30708	5.46281	47.9309	1.34598e-11	3.26547e-10
Proteobacteria	Deltaproteobacteria	unclassified	unclassified	unclassified	NA	8.20304	6.72385	47.5306	1.62195e-11	3.77104e-10
Proteobacteria	Alphaproteobacteria	Sphingomonadales	unclassified	unclassified	NA	-9.30229	12.173	46.7216	2.3659e-11	5.25239e-10
Bacteroidetes	Bac22	unclassified	unclassified	unclassified	NA	-5.55686	5.42918	46.6491	2.44735e-11	5.25239e-10
Actinobacteria	Actinobacteria	Actinomycetales	Pseudonocardiaceae	Amycolatopsis	NA	-8.56533	8.6156	44.9946	5.30863e-11	1.09712e-09
Bacteroidetes	Saprospirae	Saprospirales	Chitinophagaceae	Trachelomonas	NA	8.86424	7.96313	44.3615	7.14455e-11	1.42381e-09
Proteobacteria	Deltaproteobacteria	Bdellovibrionales	Bacteriovoracaceae	Peredibacter	NA	-5.17768	4.06599	41.4588	2.80462e-10	5.2684e-09
Proteobacteria	Deltaproteobacteria	Myxococcales	Cystobacterineae	unclassified	NA	-4.91573	4.44125	41.3887	2.89912e-10	5.2684e-09
Armatimonadetes	Chthonomonadetes	Chthonomonadales	Chthonomonadaceae	unclassified	NA	-4.44032	3.1175	41.3686	2.92689e-10	5.2684e-09
Planctomycetes	Planctomycetia	Pirellulales	Pirellulaceae	Pirellula	NA	3.91583	2.01572	40.6172	4.1767e-10	7.28313e-09
Proteobacteria	Betaproteobacteria	Methylophilales	unclassified	unclassified	NA	4.54835	3.36318	40.2265	5.02611e-10	8.49869e-09
Proteobacteria	Betaproteobacteria	Gallionellales	Gallionellaceae	unclassified	NA	6.43359	6.01724	39.1428	8.40707e-10	1.37975e-08
Firmicutes	Bacilli	Bacillales	unclassified	unclassified	NA	-6.56482	5.39191	37.963	1.47417e-09	2.35025e-08
Actinobacteria	Actinobacteria	Actinomycetales	Nocardioidaceae	Nocardioides	NA	10.0168	10.5276	37.7335	1.64464e-09	2.54919e-08
Bacteroidetes	At12OctB3	unclassified	unclassified	unclassified	NA	4.9044	4.21276	37.4059	1.92285e-09	2.89987e-08
Fibrobacteres	Fibrobacteria	258ds10	unclassified	unclassified	NA	-5.48314	5.61788	36.2766	3.2991e-09	4.84447e-08
Proteobacteria	Gammaproteobacteria	Alteromonadales	OM60	Haliea	NA	3.75254	1.9243	36.192	3.43536e-09	4.91521e-08
WS3	PRR-12	Sediment-1	PRR-10	unclassified	NA	9.29314	9.20182	35.6021	4.55758e-09	6.24782e-08
Bacteroidetes	Saprospirae	Saprospirales	Chitinophagaceae	Niastella	NA	-6.93365	7.09393	35.587	4.59069e-09	6.24782e-08
Proteobacteria	Deltaproteobacteria	Myxococcales	Myxococcaceae	Corallococcus	NA	4.25021	5.64728	34.8562	6.5194e-09	8.66149e-08
Chloroflexi	Anaerolineae	CFB-26	unclassified	unclassified	NA	-5.91547	6.17728	33.5429	1.22658e-08	1.56979e-07
NKB19	TSBW08	unclassified	unclassified	unclassified	NA	-6.28361	6.86212	33.524	1.23783e-08	1.56979e-07
TM7	SC3	unclassified	unclassified	unclassified	NA	-4.98831	4.78373	33.3099	1.37244e-08	1.70182e-07
Gemmatimonadetes	Gemm-2	unclassified	unclassified	unclassified	NA	-7.33022	7.37876	33.2106	1.43981e-08	1.71162e-07
NKB19	unclassified	unclassified	unclassified	unclassified	NA	4.76362	3.82191	33.2079	1.44168e-08	1.71162e-07
Actinobacteria	Acidimicrobiia	Acidimicrobiales	EB1017	unclassified	NA	-9.66332	9.39338	32.774	1.7776e-08	2.06646e-07
Proteobacteria	Alphaproteobacteria	Sphingomonadales	Sphingomonadaceae	Sphingosinicella	NA	-4.02352	2.93816	32.6798	1.86041e-08	2.11858e-07
Proteobacteria	Gammaproteobacteria	Legionellales	Coxiellaceae	unclassified	NA	6.61607	6.24914	32.2353	2.30642e-08	2.57397e-07
Acidobacteria	Acidobacteriia	Acidobacteriales	Koribacteraceae	Candidatus Koribacter	NA	5.73371	6.14766	32.1467	2.40738e-08	2.63396e-07
Proteobacteria	Deltaproteobacteria	Myxococcales	Nannocystaceae	Plesiocystis	NA	-7.35725	7.53465	31.6588	3.04887e-08	3.27167e-07
Chlorobi	OPB56	unclassified	unclassified	unclassified	NA	7.44163	10.0806	31.3663	3.51324e-08	3.69885e-07
Actinobacteria	Actinobacteria	Actinomycetales	Frankiaceae	unclassified	NA	10.5908	12.1297	30.9089	4.38635e-08	4.53256e-07
Planctomycetes	Planctomycetia	B97	unclassified	unclassified	NA	3.34722	1.73471	30.0122	6.78277e-08	6.88143e-07
Bacteroidetes	Flavobacteriia	Flavobacteriales	Cryomorphaceae	unclassified	NA	5.70396	5.5055	29.8488	7.34451e-08	7.31828e-07
Actinobacteria	Thermoleophilia	Solirubrobacterales	Patulibacteraceae	unclassified	NA	-7.27905	8.22001	29.6906	7.93272e-08	7.65424e-07
Bacteroidetes	Saprospirae	Saprospirales	Chitinophagaceae	Lacibacter	NA	-6.59286	7.33903	29.6846	7.95602e-08	7.65424e-07
Proteobacteria	Alphaproteobacteria	Rhizobiales	Bradyrhizobiaceae	unclassified	NA	-8.28029	8.55095	29.1644	1.02526e-07	9.6965e-07
Chloroflexi	S085	unclassified	unclassified	unclassified	NA	-6.91016	7.66774	28.5979	1.35201e-07	1.25737e-06
Actinobacteria	Actinobacteria	Actinomycetales	Kineosporiaceae	Kineosporia	NA	-3.14286	1.55409	28.5559	1.38005e-07	1.26241e-06
Proteobacteria	Alphaproteobacteria	Rhizobiales	Methylobacteriaceae	unclassified	NA	4.90088	5.8263	28.519	1.40512e-07	1.26461e-06
Chloroflexi	Anaerolineae	H39	unclassified	unclassified	NA	-3.77779	3.71862	28.4143	1.47894e-07	1.30992e-06
Chloroflexi	Anaerolineae	Ardenscatenales	Ardenscatenaceae	Ardenscatena	NA	-6.27229	7.36834	28.3668	1.5137e-07	1.31976e-06
Proteobacteria	Alphaproteobacteria	Rhizobiales	Phyllobacteriaceae	Aminobacter	NA	-7.79474	9.14753	27.9965	1.81441e-07	1.5576e-06
Actinobacteria	Actinobacteria	Actinomycetales	Streptomycetaceae	unclassified	NA	10.0171	11.9956	27.4022	2.42778e-07	2.05258e-06
Planctomycetes	Planctomycetia	Gemmatales	Gemmataceae	Gemmata	NA	6.09905	7.42668	27.2917	2.56299e-07	2.13455e-06
Gemmatimonadetes	Gemmatimonadetes	Gemmatimonadales	Gemmatimonadaceae	Gemmatimonas	NA	-7.52322	9.33676	27.2121	2.66501e-07	2.18688e-06
Proteobacteria	Alphaproteobacteria	BD7-3	unclassified	unclassified	NA	-6.40117	6.78253	27.0711	2.85597e-07	2.30961e-06
Bacteroidetes	Cytophagia	Cytophagales	Cytophagaceae	Rhodocytophaga	NA	5.10701	5.67016	26.6871	3.44888e-07	2.74925e-06
Chloroflexi	unclassified	unclassified	unclassified	unclassified	NA	-5.36866	7.77366	26.3017	4.16865e-07	3.2762e-06
Actinobacteria	Thermoleophilia	Gaiellales	unclassified	unclassified	NA	-5.15804	5.56619	25.9729	4.90129e-07	3.7985e-06
Verrucomicrobia	Opitutae	Opitutales	Opitutaceae	Opitutus	NA	-5.60092	7.02305	25.0411	7.76136e-07	5.93266e-06
Bacteroidetes	Cytophagia	Cytophagales	Cytophagaceae	Pontibacter	NA	4.03358	5.9462	24.8879	8.37191e-07	6.31287e-06
Bacteroidetes	Sphingobacteriia	Sphingobacteriales	Sphingobacteriaceae	Mucilaginibacter	NA	-5.58284	6.78152	24.855	8.50921e-07	6.33085e-06
Proteobacteria	Alphaproteobacteria	Rhizobiales	Aurantimonadaceae	unclassified	NA	4.75318	6.22631	24.0484	1.26849e-06	9.31335e-06
Actinobacteria	Actinobacteria	Actinomycetales	Micromonosporaceae	Micromonospora	NA	7.77149	10.5711	23.9692	1.31928e-06	9.56051e-06
Firmicutes	Bacilli	Lactobacillales	Streptococcaceae	Lactococcus	NA	-4.88977	8.21566	22.9307	2.20987e-06	1.58091e-05
Proteobacteria	Deltaproteobacteria	Myxococcales	Polyangiaceae	Sorangium	NA	-7.19229	10.0662	20.6493	6.90816e-06	4.83274e-05
Bacteroidetes	Saprospirae	Saprospirales	Chitinophagaceae	Niabella	NA	6.14825	9.14601	20.6434	6.92866e-06	4.83274e-05
Proteobacteria	Gammaproteobacteria	Pseudomonadales	Pseudomonadaceae	unclassified	NA	-5.49179	6.92702	20.4603	7.5958e-06	5.23266e-05
Proteobacteria	Betaproteobacteria	Nitrosomonadales	Nitrosomonadaceae	Nitrosospira	NA	-3.50372	4.50035	20.3245	8.13165e-06	5.53349e-05
Chloroflexi	Anaerolineae	SBR1031	oc28	unclassified	NA	-3.11295	3.35181	20.1547	8.8561e-06	5.95386e-05
Chloroflexi	TK10	AKYG885	23	unclassified	NA	-3.71197	5.81413	19.9968	9.58804e-06	6.3692e-05
Proteobacteria	Alphaproteobacteria	Caulobacterales	Caulobacteraceae	Asticcacaulis	NA	4.10386	5.78991	19.7763	1.07128e-05	7.03263e-05
Cyanobacteria	ML635J-21	unclassified	unclassified	unclassified	NA	7.05968	11.2362	19.6609	1.13541e-05	7.36696e-05
Proteobacteria	Gammaproteobacteria	Xanthomonadales	Xanthomonadaceae	Xanthomonas	NA	5.706	11.1607	19.5573	1.19619e-05	7.67211e-05
Firmicutes	Bacilli	Bacillales	Exiguobacteraceae	Exiguobacterium	NA	-6.64986	10.1471	18.7747	1.77554e-05	0.000112585
TM7	TM7-3	unclassified	unclassified	unclassified	NA	-6.57744	9.69125	18.6432	1.89761e-05	0.000118974
Proteobacteria	TA18	PHOS-HD29	unclassified	unclassified	NA	2.49706	1.42583	17.9617	2.67988e-05	0.000166152
Bacteroidetes	Flavobacteriia	Flavobacteriales	Flavobacteriaceae	unclassified	NA	-5.73977	9.06032	17.8958	2.77107e-05	0.000169918
Proteobacteria	Alphaproteobacteria	Rhizobiales	Bradyrhizobiaceae	Bosea	NA	5.0885	8.10897	17.6946	3.06905e-05	0.000186144
Proteobacteria	Deltaproteobacteria	Myxococcales	Myxococcaceae	Myxococcus	NA	4.45033	7.31664	17.3537	3.64949e-05	0.000218969
Proteobacteria	Deltaproteobacteria	Myxococcales	OM27	unclassified	NA	5.34397	8.43689	17.0268	4.31027e-05	0.000255865
Thermi	Deinococci	Deinococcales	Trueperaceae	unclassified	NA	-3.49739	5.49944	16.8985	4.60137e-05	0.00027027
Planctomycetes	Phycisphaerae	CPla-3	unclassified	unclassified	NA	4.32655	6.69394	16.1722	6.66712e-05	0.000387526
Proteobacteria	Alphaproteobacteria	Rhizobiales	Brucellaceae	unclassified	NA	6.82626	11.4221	15.6862	8.55116e-05	0.000491912
Actinobacteria	Actinobacteria	Actinomycetales	Intrasporangiaceae	unclassified	NA	-5.26149	9.43569	14.2718	0.000177064	0.00100818
Proteobacteria	Gammaproteobacteria	Xanthomonadales	Xanthomonadaceae	Dokdonella	NA	-4.55186	9.10533	11.9224	0.000601196	0.00338856
Elusimicrobia	Elusimicrobia	IIb	unclassified	unclassified	NA	-2.6272	5.37591	11.687	0.000680249	0.00379579
Acidobacteria	S035	unclassified	unclassified	unclassified	NA	-3.99914	8.32263	10.7683	0.0011039	0.00609879
Proteobacteria	Alphaproteobacteria	Caulobacterales	Caulobacteraceae	Arthrospira	NA	2.49381	5.0766	10.7382	0.00112164	0.00613605
Verrucomicrobia	Verrucomicrobiae	Verrucomicrobiales	Verrucomicrobiaceae	Prosthecobacter	NA	5.54364	14.0546	10.5413	0.00124488	0.0067441
Proteobacteria	Alphaproteobacteria	Rhizobiales	Phyllobacteriaceae	Mesorhizobium	NA	-4.62515	11.8384	10.0547	0.00161193	0.00864865
Actinobacteria	Thermoleophilia	Solirubrobacterales	Conexibacteraceae	unclassified	NA	3.42345	8.247	9.7794	0.00186652	0.00991921

## Sheet: NAM-43
Phylum	Class	Order	Family	Genus	Species	logFC	logCPM	F	PValue	FDR
Proteobacteria	Deltaproteobacteria	Myxococcales	Myxococcaceae	Anaeromyxobacter	NA	8.3195	5.56527	102.425	4.79756e-22	2.34689e-19
Proteobacteria	Alphaproteobacteria	Rhodospirillales	Rhodospirillaceae	Dongia	NA	-8.48042	5.40914	101.089	8.4118e-22	2.34689e-19
Proteobacteria	Alphaproteobacteria	Sphingomonadales	Sphingomonadaceae	Sphingobium	NA	-7.96266	4.8835	98.0215	3.06725e-21	5.70509e-19
Actinobacteria	Actinobacteria	Actinomycetales	Streptosporangiaceae	Nonomuraea	NA	-8.23952	5.4832	91.7646	4.38883e-20	6.12241e-18
Proteobacteria	Alphaproteobacteria	Rhizobiales	Beijerinckiaceae	Chelatococcus	NA	8.08596	5.3709	88.633	1.68105e-19	1.87605e-17
Actinobacteria	Actinobacteria	Actinomycetales	Cryptosporangiaceae	Cryptosporangium	NA	7.71459	5.18641	86.1967	4.80395e-19	4.46767e-17
Actinobacteria	Actinobacteria	Actinomycetales	Thermomonosporaceae	Actinoallomurus	NA	6.72267	4.07803	80.0644	6.89383e-18	5.49537e-16
Firmicutes	Bacilli	Bacillales	Planococcaceae	unclassified	NA	6.59491	3.96496	78.366	1.4494e-17	1.01095e-15
Firmicutes	Bacilli	Bacillales	Thermoactinomycetaceae	unclassified	NA	-6.02231	3.13557	76.5018	3.28553e-17	2.03703e-15
Actinobacteria	Actinobacteria	Actinomycetales	Actinosynnemataceae	Kibdelosporangium	NA	-7.4534	6.74856	71.813	2.60656e-16	1.45446e-14
Proteobacteria	Alphaproteobacteria	Rhodobacterales	Rhodobacteraceae	unclassified	NA	-8.51372	5.8974	68.669	1.05615e-15	5.35754e-14
Chloroflexi	TK10	AKYG885	5B-12	unclassified	NA	-5.33857	2.66365	67.7094	1.62148e-15	7.53989e-14
Firmicutes	Bacilli	Bacillales	Paenibacillaceae	Saccharibacillus	NA	6.25523	4.39279	61.05	3.24965e-14	1.39485e-12
Proteobacteria	Alphaproteobacteria	Rhodobacterales	Hyphomonadaceae	Woodsholea	NA	6.49819	5.16528	60.6228	3.94411e-14	1.57201e-12
Proteobacteria	Betaproteobacteria	Burkholderiales	Comamonadaceae	Pseudorhodoferax	NA	10.7361	9.35225	58.6402	9.71062e-14	3.61235e-12
Actinobacteria	Actinobacteria	Actinomycetales	Microbacteriaceae	Clavibacter	NA	8.89872	7.91012	56.7366	2.31442e-13	8.07153e-12
TM6	SJA-4	unclassified	unclassified	unclassified	NA	5.50024	3.41259	55.3295	4.40764e-13	1.44674e-11
Proteobacteria	Betaproteobacteria	Rhodocyclales	Rhodocyclaceae	Uliginosibacterium	NA	4.92943	2.63628	54.2534	7.22305e-13	2.23915e-11
MVP-21	unclassified	unclassified	unclassified	unclassified	NA	-5.88682	4.4149	53.7443	9.12812e-13	2.68079e-11
Proteobacteria	Alphaproteobacteria	Rickettsiales	Rickettsiaceae	unclassified	NA	7.46774	5.82832	52.6315	1.52394e-12	4.2518e-11
WS3	PRR-12	LD1-PA13	unclassified	unclassified	NA	-6.4632	5.09027	52.2427	1.8233e-12	4.67518e-11
Firmicutes	Bacilli	Bacillales	Staphylococcaceae	Staphylococcus	NA	6.78048	6.53226	52.2191	1.84326e-12	4.67518e-11
Chloroflexi	Anaerolineae	SBR1031	SJA-101	unclassified	NA	9.48872	7.42651	51.4607	2.61641e-12	6.34764e-11
Actinobacteria	Thermoleophilia	Gaiellales	02E	unclassified	NA	7.17225	5.50952	50.6271	3.84772e-12	8.94595e-11
Proteobacteria	Betaproteobacteria	Burkholderiales	Comamonadaceae	Hylemonella	NA	7.03271	6.82617	49.6252	6.12245e-12	1.36653e-10
Proteobacteria	Alphaproteobacteria	Rhodospirillales	Acetobacteraceae	Craurococcus	NA	-6.46124	5.46281	49.4152	6.7493e-12	1.4485e-10
Chlorobi	unclassified	unclassified	unclassified	unclassified	NA	5.97804	4.87006	48.4414	1.06122e-11	2.18775e-10
Bacteroidetes	Bac22	unclassified	unclassified	unclassified	NA	-5.71119	5.42918	48.3686	1.0978e-11	2.18775e-10
Proteobacteria	Alphaproteobacteria	Rickettsiales	unclassified	unclassified	NA	5.29864	3.99849	47.8255	1.4137e-11	2.72016e-10
Gemmatimonadetes	unclassified	unclassified	unclassified	unclassified	NA	-8.15868	7.04275	47.587	1.57987e-11	2.80636e-10
Proteobacteria	Alphaproteobacteria	Sphingomonadales	unclassified	unclassified	NA	-9.43194	12.173	47.5639	1.59702e-11	2.80636e-10
Gemmatimonadetes	Gemmatimonadetes	KD8-87	unclassified	unclassified	NA	6.56606	5.74146	47.5473	1.60938e-11	2.80636e-10
TM7	TM7-3	I025	unclassified	unclassified	NA	6.61126	5.8537	46.9303	2.14617e-11	3.62898e-10
Verrucomicrobia	Methylacidiphilae	Methylacidiphilales	LD19	unclassified	NA	7.46534	6.69323	46.0154	3.29112e-11	5.40131e-10
Actinobacteria	Actinobacteria	Actinomycetales	Pseudonocardiaceae	Amycolatopsis	NA	-8.70134	8.6156	45.9124	3.45375e-11	5.48155e-10
Actinobacteria	Acidimicrobiia	Acidimicrobiales	C111	Ilumatobacter	NA	4.38959	2.28381	45.8618	3.53649e-11	5.48155e-10
Planctomycetes	Phycisphaerae	Phycisphaerales	unclassified	unclassified	NA	4.3304	2.2484	45.3862	4.41845e-11	6.6635e-10
Actinobacteria	Actinobacteria	Actinomycetales	Nocardioidaceae	Nocardioides	NA	11.4833	10.5276	44.6704	6.18032e-11	9.07531e-10
Proteobacteria	Deltaproteobacteria	Myxococcales	Haliangiaceae	Haliangium	NA	5.10182	4.84498	44.0968	8.09058e-11	1.15757e-09
Actinobacteria	Actinobacteria	Actinomycetales	Micromonosporaceae	Micromonospora	NA	12.3205	10.5711	43.0319	1.33515e-10	1.86253e-09
WPS-2	unclassified	unclassified	unclassified	unclassified	NA	4.95127	5.05995	42.4961	1.71868e-10	2.33908e-09
Actinobacteria	Actinobacteria	Actinomycetales	Cellulomonadaceae	Cellulomonas	NA	11.8749	10.2266	42.229	1.94945e-10	2.58999e-09
Chlorobi	OPB56	unclassified	unclassified	unclassified	NA	9.07494	10.0806	40.8716	3.70262e-10	4.8048e-09
Proteobacteria	Gammaproteobacteria	Legionellales	unclassified	unclassified	NA	-6.24424	5.30116	39.8595	5.98166e-10	7.58583e-09
WS3	PRR-12	Sediment-1	PRR-10	unclassified	NA	10.0968	9.20182	39.5838	6.81817e-10	8.45453e-09
Firmicutes	Bacilli	Bacillales	unclassified	unclassified	NA	-6.71933	5.39191	39.0777	8.67125e-10	1.05186e-08
Chloroflexi	SAR202	unclassified	unclassified	unclassified	NA	-6.57594	6.52427	37.6493	1.71199e-09	2.03253e-08
Bacteroidetes	Saprospirae	Saprospirales	Chitinophagaceae	Chitinophaga	NA	-10.0396	9.15172	37.4394	1.89235e-09	2.17481e-08
Proteobacteria	Alphaproteobacteria	Rhizobiales	Methylobacteriaceae	Methylobacterium	NA	-8.07979	8.4303	37.4202	1.90978e-09	2.17481e-08
Armatimonadetes	Fimbriimonadia	Fimbriimonadales	Fimbriimonadaceae	unclassified	NA	5.60703	5.11847	36.3461	3.19107e-09	3.56124e-08
Bacteroidetes	Saprospirae	Saprospirales	Chitinophagaceae	Niastella	NA	-7.02235	7.09393	36.2415	3.35498e-09	3.67074e-08
Proteobacteria	Deltaproteobacteria	Myxococcales	Myxococcaceae	Corallococcus	NA	-4.37607	5.64728	35.2582	5.37494e-09	5.76773e-08
Proteobacteria	Alphaproteobacteria	Sphingomonadales	Sphingomonadaceae	Sphingosinicella	NA	-4.19337	2.93816	34.6831	7.08505e-09	7.45935e-08
TM7	SC3	unclassified	unclassified	unclassified	NA	-5.11852	4.78373	34.5413	7.58472e-09	7.76246e-08
NKB19	TSBW08	unclassified	unclassified	unclassified	NA	-6.42762	6.86212	34.5232	7.65117e-09	7.76246e-08
Proteobacteria	Alphaproteobacteria	Rhizobiales	Brucellaceae	unclassified	NA	12.5444	11.4221	34.4057	8.09577e-09	8.06686e-08
Bacteroidetes	Saprospirae	Saprospirales	Chitinophagaceae	Niabella	NA	8.86618	9.14601	34.1806	9.02186e-09	8.83192e-08
Chloroflexi	Anaerolineae	CFB-26	unclassified	unclassified	NA	-5.94894	6.17728	33.893	1.03618e-08	9.96875e-08
Verrucomicrobia	Verrucomicrobiae	Verrucomicrobiales	Verrucomicrobiaceae	Luteolibacter	NA	5.86979	6.05272	33.7215	1.1254e-08	1.06436e-07
Actinobacteria	Actinobacteria	Actinomycetales	Frankiaceae	unclassified	NA	11.3525	12.1297	33.6614	1.15849e-08	1.0774e-07
Proteobacteria	Deltaproteobacteria	Myxococcales	Nannocystaceae	Nannocystis	NA	10.7095	9.98392	33.3175	1.3674e-08	1.2379e-07
Proteobacteria	Gammaproteobacteria	Xanthomonadales	Xanthomonadaceae	Luteimonas	NA	-10.1612	10.9018	33.3054	1.37544e-08	1.2379e-07
Verrucomicrobia	Spartobacteria	Chthoniobacterales	Chthoniobacteraceae	Ellin506	NA	-9.92325	10.7914	33.1064	1.514e-08	1.34097e-07
Proteobacteria	Deltaproteobacteria	Myxococcales	Polyangiaceae	Aetherobacter	NA	7.71712	9.05663	31.9594	2.63577e-08	2.29807e-07
Actinobacteria	Actinobacteria	Actinomycetales	Kineosporiaceae	Kineosporia	NA	-3.31614	1.55409	31.0285	4.13899e-08	3.55317e-07
Armatimonadetes	Fimbriimonadia	Fimbriimonadales	unclassified	unclassified	NA	4.889	6.31779	30.7592	4.71709e-08	3.98808e-07
Cyanobacteria	ML635J-21	unclassified	unclassified	unclassified	NA	9.88087	11.2362	30.6738	4.9169e-08	4.09497e-07
Proteobacteria	Gammaproteobacteria	Legionellales	Coxiellaceae	Aquicella	NA	5.16492	5.83768	30.2716	5.97849e-08	4.90588e-07
Chloroflexi	Anaerolineae	H39	unclassified	unclassified	NA	-3.92588	3.71862	30.1112	6.46373e-08	5.22719e-07
Planctomycetes	Planctomycetia	Pirellulales	Pirellulaceae	unclassified	NA	-7.53184	7.1087	29.632	8.16261e-08	6.50676e-07
Proteobacteria	Alphaproteobacteria	Rhizobiales	Hyphomicrobiaceae	Rhodobium	NA	-8.21036	8.89459	29.4581	8.88431e-08	6.98232e-07
Chloroflexi	Anaerolineae	Ardenscatenales	Ardenscatenaceae	Ardenscatena	NA	-6.3587	7.36834	28.9147	1.15815e-07	8.9757e-07
NKB19	unclassified	unclassified	unclassified	unclassified	NA	4.3284	3.82191	28.3349	1.53749e-07	1.17523e-06
WS3	PRR-12	Sediment-1	unclassified	unclassified	NA	-8.86321	10.5986	28.0875	1.73533e-07	1.30853e-06
Bacteroidetes	Flavobacteriia	Flavobacteriales	Weeksellaceae	Elizabethkingia	NA	5.9251	8.47123	27.8873	1.91406e-07	1.42406e-06
Proteobacteria	Gammaproteobacteria	Vibrionales	Vibrionaceae	Vibrio	NA	-9.63768	11.5718	27.6751	2.12371e-07	1.55925e-06
Proteobacteria	Gammaproteobacteria	Enterobacteriales	Enterobacteriaceae	Pseudomonas	NA	-6.61405	6.91243	27.2484	2.618e-07	1.8972e-06
Gemmatimonadetes	Gemmatimonadetes	Gemmatimonadales	Gemmatimonadaceae	Gemmatimonas	NA	-7.50797	9.33676	27.185	2.70073e-07	1.93206e-06
Actinobacteria	Actinobacteria	Actinomycetales	Streptomycetaceae	unclassified	NA	9.82938	11.9956	26.7566	3.33314e-07	2.35429e-06
Proteobacteria	Alphaproteobacteria	Sphingomonadales	Sphingomonadaceae	Novosphingobium	NA	7.79926	9.5589	25.6598	5.7191e-07	3.98907e-06
Bacteroidetes	Flavobacteriia	Flavobacteriales	Cryomorphaceae	unclassified	NA	5.16071	5.5055	25.6072	5.86931e-07	4.0433e-06
Planctomycetes	Phycisphaerae	CPla-3	unclassified	unclassified	NA	5.7659	6.69394	25.4149	6.45338e-07	4.39145e-06
Bacteroidetes	Bacteroidia	Bacteroidales	unclassified	unclassified	NA	4.38582	5.19814	25.1926	7.20172e-07	4.84164e-06
Firmicutes	Bacilli	Lactobacillales	Streptococcaceae	Lactococcus	NA	5.19084	8.21566	25.01	7.88158e-07	5.23562e-06
Proteobacteria	Deltaproteobacteria	Myxococcales	OM27	unclassified	NA	6.7062	8.43689	23.7074	1.50226e-06	9.86188e-06
Chloroflexi	unclassified	unclassified	unclassified	unclassified	NA	5.00709	7.77366	23.5415	1.63123e-06	1.0584e-05
Acidobacteria	Acidobacteriia	Acidobacteriales	Koribacteraceae	Candidatus Koribacter	NA	4.52112	6.14766	22.1358	3.28381e-06	2.10617e-05
Actinobacteria	Actinobacteria	Actinomycetales	Propionibacteriaceae	unclassified	NA	4.65332	8.3542	21.9072	3.68064e-06	2.33386e-05
Proteobacteria	Gammaproteobacteria	Xanthomonadales	Xanthomonadaceae	Rhodanobacter	NA	-7.64078	10.3489	20.8051	6.38894e-06	4.00565e-05
Actinobacteria	unclassified	unclassified	unclassified	unclassified	NA	3.77995	6.51923	19.6224	1.15762e-05	7.17721e-05
Actinobacteria	Actinobacteria	Actinomycetales	Nocardiaceae	Nocardia	NA	5.30022	8.77705	19.2043	1.42928e-05	8.76415e-05
Bacteroidetes	Cytophagia	Cytophagales	Cytophagaceae	Sporocytophaga	NA	3.64772	5.27808	18.3563	2.19415e-05	0.00013308
Thermi	Deinococci	Deinococcales	Trueperaceae	unclassified	NA	-3.65137	5.49944	18.0623	2.54665e-05	0.000152799
OD1	unclassified	unclassified	unclassified	unclassified	NA	5.05377	8.92277	17.8168	2.8844e-05	0.000171223
Proteobacteria	Gammaproteobacteria	Xanthomonadales	Xanthomonadaceae	Luteibacter	NA	-5.72529	9.18456	16.2082	6.54561e-05	0.000384468
Proteobacteria	Deltaproteobacteria	Bdellovibrionales	Bdellovibrionaceae	Bdellovibrio	NA	4.72407	7.83264	15.1752	0.000111165	0.000646147
Acidobacteria	BPC102	MVS-40	unclassified	unclassified	NA	-4.33435	8.40541	14.1361	0.000189935	0.00109262
Proteobacteria	Betaproteobacteria	Burkholderiales	Oxalobacteraceae	Massilia	NA	6.40846	12.2108	13.705	0.000237422	0.00135185
Proteobacteria	unclassified	unclassified	unclassified	unclassified	NA	4.43618	8.16645	13.2622	0.000298762	0.00168393
Bacteroidetes	Cytophagia	Cytophagales	Cytophagaceae	Pontibacter	NA	2.72753	5.9462	12.7886	0.000382258	0.002133
Proteobacteria	Deltaproteobacteria	NB1-j	NB1-i	unclassified	NA	2.58388	4.35998	11.9267	0.000599838	0.00331396
Proteobacteria	Deltaproteobacteria	Myxococcales	Polyangiaceae	Sorangium	NA	4.92523	10.0662	11.5935	0.000714501	0.00390874
Firmicutes	Bacilli	Bacillales	Exiguobacteraceae	Exiguobacterium	NA	4.78616	10.1471	11.2139	0.000872515	0.00472683
Actinobacteria	Actinobacteria	Actinomycetales	Nocardioidaceae	unclassified	NA	5.51885	13.215	11.1933	0.000882013	0.00473234
Proteobacteria	Alphaproteobacteria	BD7-3	unclassified	unclassified	NA	-3.53302	6.78253	11.0727	0.000939927	0.00499504
Proteobacteria	Gammaproteobacteria	Vibrionales	Vibrionaceae	Listonella	NA	-2.75215	6.20189	10.8825	0.00103922	0.00547063
Proteobacteria	Alphaproteobacteria	Rhodospirillales	Acetobacteraceae	Roseomonas	NA	4.88829	11.2513	10.4507	0.0013061	0.00681125
TM7	TM7-3	unclassified	unclassified	unclassified	NA	-4.43965	9.69125	10.422	0.00132614	0.00685173

## Sheet: NAM-46
Phylum	Class	Order	Family	Genus	Species	logFC	logCPM	F	PValue	FDR
Firmicutes	Bacilli	Lactobacillales	Enterococcaceae	Enterococcus	NA	14.5257	11.7222	139.065	1.60403e-28	8.95047e-26
Proteobacteria	Gammaproteobacteria	Enterobacteriales	Enterobacteriaceae	Klebsiella	NA	10.553	7.75746	116.964	1.15855e-24	3.23234e-22
Proteobacteria	Betaproteobacteria	Burkholderiales	Comamonadaceae	Hydrogenophaga	NA	9.35012	6.56849	108.758	3.41224e-23	6.34677e-21
Actinobacteria	Actinobacteria	Actinomycetales	Intrasporangiaceae	Knoellia	NA	8.51627	5.75521	103.572	2.96564e-22	4.13707e-20
Firmicutes	Clostridia	Clostridiales	Lachnospiraceae	Clostridium	NA	10.7923	8.03358	102.683	4.30658e-22	4.80614e-20
Proteobacteria	Alphaproteobacteria	Rhodospirillales	Rhodospirillaceae	Dongia	NA	-8.25461	5.40914	97.8829	3.25241e-21	3.02474e-19
Proteobacteria	Alphaproteobacteria	Sphingomonadales	Sphingomonadaceae	Sphingobium	NA	-7.7328	4.8835	94.7246	1.24181e-20	9.89897e-19
Actinobacteria	Actinobacteria	Actinomycetales	Streptosporangiaceae	Nonomuraea	NA	-8.0607	5.4832	89.2595	1.28419e-19	8.95726e-18
Proteobacteria	Betaproteobacteria	Burkholderiales	Oxalobacteraceae	Naxibacter	NA	6.50511	3.88418	77.902	1.77635e-17	1.07159e-15
OD1	ZB2	unclassified	unclassified	unclassified	NA	8.24865	6.64306	77.7243	1.92042e-17	1.07159e-15
Actinobacteria	Actinobacteria	Actinomycetales	Cellulomonadaceae	unclassified	NA	7.97434	6.08908	74.9879	6.39944e-17	3.24626e-15
Actinobacteria	Actinobacteria	Actinomycetales	Propionibacteriaceae	unclassified	NA	10.9791	8.3542	72.8447	1.64989e-16	7.67197e-15
Firmicutes	Bacilli	Bacillales	Thermoactinomycetaceae	unclassified	NA	-5.77518	3.13557	72.5603	1.87144e-16	8.03281e-15
Proteobacteria	Gammaproteobacteria	Enterobacteriales	Enterobacteriaceae	Enterobacter	NA	13.8072	12.8884	71.3407	3.21453e-16	1.28122e-14
Actinobacteria	Actinobacteria	Actinomycetales	Actinosynnemataceae	Kibdelosporangium	NA	-7.24154	6.74856	69.3058	7.94948e-16	2.95721e-14
Actinobacteria	Actinobacteria	Actinomycetales	Williamsiaceae	Williamsia	NA	-6.21193	4.81226	64.3557	7.30184e-15	2.49643e-13
Chloroflexi	TK10	AKYG885	5B-12	unclassified	NA	-5.14002	2.66365	64.2651	7.60562e-15	2.49643e-13
Proteobacteria	Gammaproteobacteria	Xanthomonadales	Xanthomonadaceae	Xanthomonas	NA	13.7696	11.1607	62.0113	2.10301e-14	6.51932e-13
Proteobacteria	Betaproteobacteria	Burkholderiales	Comamonadaceae	Ramlibacter	NA	-7.78362	7.86239	61.4886	2.66416e-14	7.74628e-13
Chlorobi	OPB56	unclassified	unclassified	unclassified	NA	12.5975	10.0806	61.3974	2.77644e-14	7.74628e-13
Actinobacteria	Actinobacteria	Actinomycetales	Micromonosporaceae	Pilimelia	NA	-9.02279	7.49493	57.6067	1.55541e-13	4.13296e-12
Proteobacteria	Gammaproteobacteria	Pseudomonadales	Moraxellaceae	Perlucidibaca	NA	-5.35588	3.73967	53.6111	9.70515e-13	2.46158e-11
Verrucomicrobia	Pedosphaerae	Pedosphaerales	Ellin515	unclassified	NA	5.4525	3.89	51.5086	2.55907e-12	6.20854e-11
Proteobacteria	Gammaproteobacteria	Alteromonadales	Alteromonadaceae	unclassified	NA	5.91826	4.20082	51.3337	2.77458e-12	6.4509e-11
Proteobacteria	Deltaproteobacteria	Myxococcales	Polyangiaceae	Chondromyces	NA	-8.3384	9.94347	51.1417	3.03224e-12	6.76795e-11
Proteobacteria	Alphaproteobacteria	Caulobacterales	Caulobacteraceae	Asticcacaulis	NA	7.50265	5.78991	49.8466	5.52465e-12	1.18568e-10
Proteobacteria	Betaproteobacteria	Burkholderiales	unclassified	unclassified	NA	6.24126	5.029	47.6335	1.54601e-11	3.19508e-10
Proteobacteria	Alphaproteobacteria	Rhodospirillales	Acetobacteraceae	Craurococcus	NA	-6.23581	5.46281	47.3203	1.78912e-11	3.56545e-10
Bacteroidetes	Bac22	unclassified	unclassified	unclassified	NA	-5.48552	5.42918	45.8479	3.55948e-11	6.65306e-10
Proteobacteria	Deltaproteobacteria	Myxococcales	Myxococcaceae	Myxococcus	NA	8.63606	7.31664	45.8375	3.57691e-11	6.65306e-10
Cyanobacteria	ML635J-21	unclassified	unclassified	unclassified	NA	13.7212	11.2362	45.7403	3.7434e-11	6.73812e-10
Proteobacteria	Alphaproteobacteria	Rhizobiales	Aurantimonadaceae	unclassified	NA	7.23901	6.22631	45.056	5.15789e-11	8.99406e-10
Elusimicrobia	Elusimicrobia	IIb	unclassified	unclassified	NA	-6.09042	5.37591	44.2237	7.62242e-11	1.28888e-09
Actinobacteria	Actinobacteria	Actinomycetales	Frankiaceae	unclassified	NA	14.2497	12.1297	44.1389	7.93227e-11	1.30183e-09
Actinobacteria	Actinobacteria	Actinomycetales	Propionibacteriaceae	Propionibacterium	NA	5.8032	4.97364	43.9749	8.56753e-11	1.35395e-09
Bacteroidetes	Saprospirae	Saprospirales	Chitinophagaceae	Niabella	NA	10.8011	9.14601	43.9337	8.73519e-11	1.35395e-09
Proteobacteria	Gammaproteobacteria	Xanthomonadales	Xanthomonadaceae	Dyella	NA	8.38438	7.97976	42.3648	1.82842e-10	2.75745e-09
Actinobacteria	Actinobacteria	Actinomycetales	Streptomycetaceae	unclassified	NA	14.1805	11.9956	41.7406	2.45503e-10	3.60501e-09
Proteobacteria	Deltaproteobacteria	Bdellovibrionales	Bacteriovoracaceae	Peredibacter	NA	-5.11931	4.06599	40.8	3.83023e-10	5.36278e-09
Actinobacteria	Actinobacteria	Actinomycetales	Cryptosporangiaceae	unclassified	NA	-8.28465	8.65653	40.7923	3.84429e-10	5.36278e-09
Proteobacteria	Alphaproteobacteria	Rhizobiales	Rhizobiaceae	Kaistia	NA	8.39322	7.45686	40.5669	4.27734e-10	5.78356e-09
Proteobacteria	Deltaproteobacteria	Myxococcales	Cystobacterineae	unclassified	NA	-4.84198	4.44125	40.5298	4.35322e-10	5.78356e-09
Armatimonadetes	Chthonomonadetes	Chthonomonadales	Chthonomonadaceae	unclassified	NA	-4.36257	3.1175	40.346	4.74932e-10	6.16307e-09
Proteobacteria	Gammaproteobacteria	Legionellales	unclassified	unclassified	NA	-6.0907	5.30116	38.5957	1.09058e-09	1.38306e-08
Firmicutes	Bacilli	Bacillales	unclassified	unclassified	NA	-6.49339	5.39191	37.5044	1.83461e-09	2.27491e-08
Bacteroidetes	Saprospirae	Saprospirales	Chitinophagaceae	Chitinophaga	NA	-9.84287	9.15172	36.5149	2.94353e-09	3.57064e-08
Verrucomicrobia	unclassified	unclassified	unclassified	unclassified	NA	-7.42375	7.61152	36.4032	3.10516e-09	3.68655e-08
Verrucomicrobia	Verrucomicrobiae	Verrucomicrobiales	Verrucomicrobiaceae	Luteolibacter	NA	6.13204	6.05272	35.9877	3.78856e-09	4.4042e-08
Fibrobacteres	Fibrobacteria	258ds10	unclassified	unclassified	NA	-5.4123	5.61788	35.6451	4.46459e-09	5.08417e-08
Proteobacteria	Betaproteobacteria	Burkholderiales	Alcaligenaceae	Bordetella	NA	4.95017	5.61795	35.0408	5.96632e-09	6.65841e-08
Actinobacteria	Actinobacteria	Actinomycetales	Microbacteriaceae	Mycetocola	NA	-6.11281	7.73208	34.4469	7.93705e-09	8.68407e-08
Planctomycetes	Planctomycetia	Gemmatales	Gemmataceae	Gemmata	NA	7.10806	7.42668	33.9839	9.91812e-09	1.06429e-07
Acidobacteria	S035	unclassified	unclassified	unclassified	NA	-8.8798	8.32263	33.8813	1.04201e-08	1.09706e-07
Proteobacteria	Betaproteobacteria	Burkholderiales	Burkholderiaceae	Burkholderia	NA	5.96512	8.27736	33.399	1.31473e-08	1.35855e-07
NKB19	TSBW08	unclassified	unclassified	unclassified	NA	-6.21669	6.86212	33.1017	1.5175e-08	1.53957e-07
Acidobacteria	BPC102	MVS-40	unclassified	unclassified	NA	-7.87547	8.40541	33.0566	1.55085e-08	1.54531e-07
Gemmatimonadetes	Gemmatimonadetes	Ellin5290	unclassified	unclassified	NA	-8.33194	8.41553	32.8475	1.71562e-08	1.67951e-07
Gemmatimonadetes	Gemm-2	unclassified	unclassified	unclassified	NA	-7.25031	7.37876	32.7922	1.76208e-08	1.69524e-07
Proteobacteria	Deltaproteobacteria	Myxococcales	Myxococcaceae	Corallococcus	NA	-4.15248	5.64728	32.6481	1.88905e-08	1.76547e-07
TM7	SC3	unclassified	unclassified	unclassified	NA	-4.91547	4.78373	32.638	1.89836e-08	1.76547e-07
Actinobacteria	Actinobacteria	Actinomycetales	Nocardioidaceae	Nocardioides	NA	8.83167	10.5276	32.1377	2.4179e-08	2.21178e-07
Proteobacteria	Alphaproteobacteria	Sphingomonadales	Sphingomonadaceae	Sphingosinicella	NA	-3.9456	2.93816	31.7563	2.9083e-08	2.61747e-07
Proteobacteria	Deltaproteobacteria	Myxococcales	Nannocystaceae	Plesiocystis	NA	-7.29177	7.53465	31.337	3.56353e-08	3.15627e-07
Proteobacteria	Deltaproteobacteria	Myxococcales	Polyangiaceae	unclassified	NA	-9.89367	10.6788	31.2133	3.784e-08	3.29918e-07
Proteobacteria	Alphaproteobacteria	Rhizobiales	Bradyrhizobiaceae	Bosea	NA	7.34248	8.10897	30.2693	5.98513e-08	5.13801e-07
Proteobacteria	Alphaproteobacteria	Rhodobacterales	Rhodobacteraceae	unclassified	NA	-4.60151	5.8974	29.3665	9.29015e-08	7.8544e-07
Bacteroidetes	Saprospirae	Saprospirales	Chitinophagaceae	Lacibacter	NA	-6.52699	7.33903	29.3352	9.43324e-08	7.85634e-07
Proteobacteria	Alphaproteobacteria	Rickettsiales	Rickettsiaceae	unclassified	NA	4.94294	5.82832	28.5159	1.4073e-07	1.15482e-06
Proteobacteria	Alphaproteobacteria	Rhodobacterales	Rhodobacteraceae	Rhodobacter	NA	-8.26814	9.27281	28.394	1.49366e-07	1.20792e-06
Actinobacteria	Actinobacteria	Actinomycetales	Kineosporiaceae	Kineosporia	NA	-3.0635	1.55409	27.4274	2.39787e-07	1.91144e-06
Chloroflexi	Anaerolineae	H39	unclassified	unclassified	NA	-3.67518	3.71862	27.2973	2.55595e-07	2.00876e-06
Chlorobi	SJA-28	unclassified	unclassified	unclassified	NA	3.54809	2.72791	26.958	3.01917e-07	2.33986e-06
Proteobacteria	Deltaproteobacteria	Myxococcales	OM27	unclassified	NA	7.20061	8.43689	26.24	4.29712e-07	3.28465e-06
Actinobacteria	Actinobacteria	Actinomycetales	Cellulomonadaceae	Cellulomonas	NA	8.07115	10.2266	25.8678	5.16173e-07	3.89223e-06
Bacteroidetes	Cytophagia	Cytophagales	Cytophagaceae	Pontibacter	NA	-4.14101	5.9462	25.3458	6.67714e-07	4.96779e-06
Proteobacteria	Betaproteobacteria	Gallionellales	Gallionellaceae	unclassified	NA	4.82641	6.01724	25.182	7.23971e-07	5.31547e-06
Proteobacteria	Gammaproteobacteria	Xanthomonadales	Xanthomonadaceae	Achromobacter	NA	6.13365	8.54979	24.8622	8.47891e-07	6.14446e-06
Bacteroidetes	Sphingobacteriia	Sphingobacteriales	Sphingobacteriaceae	Mucilaginibacter	NA	-5.57571	6.78152	24.8138	8.68449e-07	6.21275e-06
Bacteroidetes	Cytophagia	Cytophagales	Cytophagaceae	Sporocytophaga	NA	4.26398	5.27808	23.9768	1.31434e-06	9.28355e-06
Proteobacteria	Gammaproteobacteria	Pseudomonadales	Moraxellaceae	unclassified	NA	4.64058	5.4335	23.6952	1.51139e-06	1.0542e-05
Proteobacteria	Alphaproteobacteria	Sphingomonadales	unclassified	unclassified	NA	5.72984	12.173	23.1713	1.96064e-06	1.35066e-05
Actinobacteria	Actinobacteria	Actinomycetales	Promicromonosporaceae	unclassified	NA	2.85642	1.53877	22.9218	2.21966e-06	1.51045e-05
Acidobacteria	RB25	unclassified	unclassified	unclassified	NA	2.81381	1.52713	22.638	2.55647e-06	1.71869e-05
Firmicutes	Bacilli	Lactobacillales	Streptococcaceae	Lactococcus	NA	-4.82561	8.21566	22.4954	2.74472e-06	1.82328e-05
WS3	PRR-12	LD1-PA13	unclassified	unclassified	NA	-3.60813	5.09027	22.2078	3.1679e-06	2.07963e-05
Acidobacteria	Chloracidobacteria	RB41	Ellin6075	unclassified	NA	5.1657	17.276	21.9345	3.63087e-06	2.35584e-05
OD1	unclassified	unclassified	unclassified	unclassified	NA	5.73288	8.92277	21.463	4.59569e-06	2.94758e-05
Chloroflexi	TK10	AKYG885	23	unclassified	NA	-3.89892	5.81413	21.3921	4.76151e-06	3.01923e-05
Proteobacteria	Betaproteobacteria	SC-I-84	unclassified	unclassified	NA	7.59628	11.4158	21.1618	5.34339e-06	3.35013e-05
Armatimonadetes	Fimbriimonadia	Fimbriimonadales	unclassified	unclassified	NA	3.86496	6.31779	20.8795	6.15492e-06	3.81605e-05
Chloroflexi	TK10	WMSP1	unclassified	unclassified	NA	-6.07678	8.68559	20.7545	6.5533e-06	4.0184e-05
Proteobacteria	Betaproteobacteria	Burkholderiales	Oxalobacteraceae	Massilia	NA	8.65283	12.2108	20.5067	7.42066e-06	4.50079e-05
Proteobacteria	Deltaproteobacteria	Myxococcales	Nannocystaceae	Nannocystis	NA	7.33944	9.98392	20.3846	7.88997e-06	4.73398e-05
Proteobacteria	Gammaproteobacteria	Pseudomonadales	Pseudomonadaceae	unclassified	NA	-5.42503	6.92702	20.1187	9.01755e-06	5.35297e-05
Acidobacteria	Chloracidobacteria	RB41	unclassified	unclassified	NA	4.55962	18.5346	19.8573	1.02851e-05	6.04116e-05
Proteobacteria	Betaproteobacteria	Nitrosomonadales	Nitrosomonadaceae	Nitrosospira	NA	-3.43014	4.50035	19.6645	1.13331e-05	6.58738e-05
Chloroflexi	Anaerolineae	SBR1031	oc28	unclassified	NA	-3.06026	3.35181	19.5826	1.18104e-05	6.79401e-05
Actinobacteria	Actinobacteria	Actinomycetales	Nocardiaceae	Nocardia	NA	-5.29043	8.77705	19.4441	1.26647e-05	7.21113e-05
Firmicutes	Bacilli	Bacillales	Exiguobacteraceae	Exiguobacterium	NA	-6.80216	10.1471	19.3104	1.35477e-05	7.63599e-05
Acidobacteria	Chloracidobacteria	unclassified	unclassified	unclassified	NA	2.57954	1.44703	19.1092	1.49949e-05	8.36717e-05
Actinobacteria	Actinobacteria	Actinomycetales	Nocardioidaceae	unclassified	NA	8.09881	13.215	19.0412	1.5519e-05	8.57385e-05
Bacteroidetes	Saprospirae	Saprospirales	unclassified	unclassified	NA	3.79114	5.24351	18.7756	1.77473e-05	9.70881e-05
Gemmatimonadetes	Gemmatimonadetes	N1423WL	unclassified	unclassified	NA	-6.99868	11.2782	18.1722	2.40863e-05	0.000130487
Actinobacteria	Acidimicrobiia	Acidimicrobiales	JdFBGBact	unclassified	NA	2.96811	3.89456	17.5845	3.2456e-05	0.000174139
Thermi	Deinococci	Deinococcales	Trueperaceae	unclassified	NA	-3.4262	5.49944	16.362	6.05078e-05	0.000318803
Proteobacteria	Gammaproteobacteria	Legionellales	Coxiellaceae	unclassified	NA	4.26674	6.24914	16.3485	6.09258e-05	0.000318803
Bacteroidetes	Sphingobacteriia	Sphingobacteriales	Sphingobacteriaceae	unclassified	NA	6.5724	10.5509	16.3419	6.11324e-05	0.000318803
Proteobacteria	Gammaproteobacteria	Xanthomonadales	Xanthomonadaceae	Luteibacter	NA	-5.58657	9.18456	15.6656	8.64197e-05	0.000446502
Verrucomicrobia	Spartobacteria	Chthoniobacterales	Chthoniobacteraceae	Chthoniobacter	NA	7.29099	13.2799	15.2408	0.000107476	0.000550196
Gemmatimonadetes	unclassified	unclassified	unclassified	unclassified	NA	-3.7236	7.04275	15.1655	0.000111717	0.000566708
Bacteroidetes	Flavobacteriia	Flavobacteriales	Weeksellaceae	Elizabethkingia	NA	3.98693	8.47123	14.9735	0.000123311	0.000619888
Actinobacteria	Actinobacteria	Actinomycetales	Microbacteriaceae	unclassified	NA	6.68291	12.8813	14.6871	0.00014291	0.000711998
WS3	PRR-12	Sediment-1	PRR-10	unclassified	NA	4.93991	9.20182	14.5666	0.000152072	0.00075094
Acidobacteria	Acidobacteria-6	iii1-15	unclassified	unclassified	NA	3.48397	19.1572	14.3719	0.000168147	0.000823033
Bacteroidetes	Flavobacteriia	Flavobacteriales	Cryomorphaceae	Fluviicola	NA	-4.88431	9.10897	13.3214	0.000289705	0.0014057
Armatimonadetes	Fimbriimonadia	Fimbriimonadales	Fimbriimonadaceae	Fimbriimonas	NA	5.08221	10.8013	13.2466	0.000301191	0.00144883
Planctomycetes	Phycisphaerae	WD2101	unclassified	unclassified	NA	4.73449	15.4065	13.1948	0.000309409	0.00147564
Verrucomicrobia	Pedosphaerae	Pedosphaerales	Ellin517	unclassified	NA	-5.03848	10.1458	13.0356	0.000336126	0.00158948
Proteobacteria	Alphaproteobacteria	Caulobacterales	Caulobacteraceae	Mycoplana	NA	5.67872	12.1533	12.8618	0.000367958	0.00172538
Proteobacteria	Betaproteobacteria	Burkholderiales	Comamonadaceae	Acidovorax	NA	6.20751	13.2444	12.5509	0.000432725	0.00201217
Chloroflexi	Anaerolineae	Ardenscatenales	Ardenscatenaceae	Ardenscatena	NA	-3.58537	7.36834	12.241	0.000508814	0.00234643
Gemmatimonadetes	Gemmatimonadetes	unclassified	unclassified	unclassified	NA	5.51745	14.419	12.1879	0.000523141	0.00239273
Gemmatimonadetes	Gemm-1	unclassified	unclassified	unclassified	NA	3.694	15.3621	11.8757	0.000616122	0.00279509
Bacteroidetes	Cytophagia	Cytophagales	Cytophagaceae	Dyadobacter	NA	5.70362	13.2549	11.7046	0.000673974	0.00303288
Proteobacteria	Alphaproteobacteria	Rhizobiales	Phyllobacteriaceae	unclassified	NA	3.41651	7.81853	11.6746	0.000684707	0.00305653
Actinobacteria	Actinobacteria	Actinomycetales	Intrasporangiaceae	unclassified	NA	4.55864	9.43569	11.1899	0.000883609	0.00391312
Proteobacteria	Betaproteobacteria	Burkholderiales	Alcaligenaceae	Achromobacter	NA	5.57145	13.9304	11.1424	0.000906024	0.0039808
Acidobacteria	Acidobacteria-6	iii1-15	mb2424	unclassified	NA	3.72698	16.216	10.9903	0.000981742	0.00427978
Actinobacteria	Acidimicrobiia	Acidimicrobiales	unclassified	unclassified	NA	4.7695	13.5849	10.7332	0.00112463	0.00486395
Proteobacteria	Alphaproteobacteria	Rhizobiales	Bradyrhizobiaceae	unclassified	NA	-4.11745	8.55095	10.7188	0.00113318	0.00486395
Proteobacteria	Gammaproteobacteria	Xanthomonadales	Xanthomonadaceae	Stenotrophomonas	NA	4.02894	19.2448	10.6093	0.00120081	0.00511488
Proteobacteria	Alphaproteobacteria	Ellin329	unclassified	unclassified	NA	-4.552	10.1947	10.5623	0.00123108	0.0052041
Proteobacteria	Gammaproteobacteria	Vibrionales	Vibrionaceae	Listonella	NA	-2.71766	6.20189	10.4694	0.00129322	0.0054257
Chloroflexi	C0119	unclassified	unclassified	unclassified	NA	4.67909	13.7456	10.2085	0.00148533	0.00618518
Proteobacteria	Alphaproteobacteria	Sphingomonadales	Sphingomonadaceae	unclassified	NA	4.81457	11.5383	10.1751	0.00151194	0.00624933
Proteobacteria	Alphaproteobacteria	Rhizobiales	Rhizobiaceae	Agrobacterium	NA	4.40317	15.9768	10.0657	0.00160252	0.00657505
Proteobacteria	Gammaproteobacteria	Pseudomonadales	Pseudomonadaceae	Pseudomonas	NA	3.52004	17.3871	9.98165	0.0016758	0.00682553
Acidobacteria	Chloracidobacteria	PK29	unclassified	unclassified	NA	4.29372	13.4271	9.77871	0.00186721	0.00755001
Verrucomicrobia	Verrucomicrobiae	Verrucomicrobiales	Verrucomicrobiaceae	Prosthecobacter	NA	5.26317	14.0546	9.76385	0.00188207	0.00755534
Actinobacteria	Acidimicrobiia	Acidimicrobiales	EB1017	unclassified	NA	-4.07748	9.39338	9.62761	0.00202405	0.00806727
Proteobacteria	Deltaproteobacteria	unclassified	unclassified	unclassified	NA	2.94965	6.72385	9.44636	0.00223	0.00882511
Proteobacteria	Gammaproteobacteria	Xanthomonadales	Xanthomonadaceae	unclassified	NA	4.02376	14.7248	9.26197	0.00246146	0.00967251

[truncated: 6 more sheets: NAM-48, NAM-5, NAM-72, NAM-76, NAM-79, NAM-94]
